1 **Exon Junction Complex dependent mRNA localization is linked to**  
2 **centrosome organization during ciliogenesis**

3  
4 Oh Sung Kwon<sup>1</sup>, Rahul Mishra<sup>1</sup>, Adham Safieddine<sup>2,3</sup>, Emeline Coleno<sup>2,3</sup>, Quentin  
5 Alasseur<sup>1</sup>, Marion Faucourt<sup>1</sup>, Isabelle Barbosa<sup>1</sup>, Edouard Bertrand<sup>2,3</sup>, Nathalie Spassky<sup>1</sup>  
6 and Hervé Le Hir<sup>1,\*</sup>

7  
8 <sup>1</sup>Institut de Biologie de l'Ecole Normale Supérieure (IBENS), Ecole Normale Supérieure,  
9 CNRS, INSERM, PSL Research University, 46 rue d'Ulm, 75005, Paris, France

10 <sup>2</sup>Institut de Génétique Moléculaire de Montpellier, University of Montpellier, CNRS,  
11 Montpellier, France

12 <sup>3</sup>Equipe labélisée Ligue Nationale Contre le Cancer, University of Montpellier, CNRS,  
13 Montpellier, France

14  
15  
16 \*To whom correspondence should be addressed. Tel: +33 1 44 32 39 45; Email:  
17 lehir@ens.fr

18  
19 **Running title (<50k): EJC-dependent mRNA localization to centrosomes**

20  
21  
22  
23  
24  
25  
26  
27  
28

29 **Abstract (around 150 words)**

30

31 Exon junction complexes (EJC) mark untranslated spliced mRNAs and are crucial for the  
32 mRNA lifecycle. An imbalance in EJC dosage alters mouse neural stem cell (mNSC)  
33 division and is linked to human neurodevelopmental disorders. In quiescent mNSC and  
34 immortalized human retinal pigment epithelial (RPE1) cells, centrioles form a basal body  
35 for ciliogenesis. Here, we report that EJCs accumulate at basal bodies of mNSC or RPE1  
36 cells and decline when these cells differentiate or resume growth. A high-throughput  
37 smFISH screen identifies two transcripts accumulating at centrosomes in quiescent cells,  
38 *NIN* and *BICD2*. In contrast to *BICD2*, the localization of *NIN* transcripts is EJC-  
39 dependent. *NIN* mRNA encodes a core component of centrosomes required for  
40 microtubule nucleation and anchoring. We find that EJC down-regulation impairs both  
41 pericentriolar material organization and ciliogenesis. An EJC-dependent mRNA  
42 trafficking towards centrosome and basal bodies might contribute to proper mNSC  
43 division and brain development.

44

45

46

47

48

49

50

51

52

53

54

55

56

## 57 **Introduction**

58 Messenger RNAs result from a succession of maturation steps that modify  
59 transcript extremities and excise introns. These processes are tightly coupled to the  
60 transcription machinery, and ultimately lead to the packaging of mature mRNAs into large  
61 ribonucleoparticles composed of numerous RNA-binding proteins (RBPs)<sup>1</sup>. Each  
62 messenger ribonucleoprotein (mRNP) particle is composed of ubiquitous RBPs including  
63 cap-binding proteins, exon junction complexes (EJC) and polyA-binding proteins, as well  
64 as hundreds of additional common and cell-specific RBPs<sup>2-6</sup>. These RBPs densely pack  
65 the mRNP particles<sup>7,8</sup> and govern the fate and the functions of mRNAs<sup>1</sup>.

66 EJCs are deposited upstream exon-exon junctions by the splicing machinery and  
67 are potentially present in multiple copies along transcripts<sup>9,10</sup>. The EJC core complex is  
68 composed of four proteins: the RNA helicase eIF4A3 (eukaryotic initiation factor 4A3 or  
69 DDX48), the heterodimer MAGOH/Y14 (or RBM8) and MLN51 (Metastatic Lymph  
70 Node 51 or CASC3)<sup>11,12</sup>. At the center, eIF4A3 clamps RNA to ensure an unusually stable  
71 binding<sup>13,14</sup>. A dozen of additional factors bind directly or indirectly the EJC core and  
72 constitute EJC peripheral factors<sup>15</sup>. mRNP particles are largely remodeled upon  
73 translation in the cytoplasm<sup>7,8</sup> and EJCs are disassembled at this step by scanning  
74 ribosomes<sup>16</sup>. Therefore, EJCs mark a precise period in the mRNA lifecycle between  
75 nuclear splicing and cytosolic translation. During this period, EJCs contribute to splicing  
76 regulation and to the recruitment of nuclear export factors<sup>15,17</sup>. In the cytoplasm, EJCs  
77 are intimately linked to mRNA translation and stability. First, EJCs enhance the  
78 translational efficiency of newly made mRNP by communicating with the translation  
79 machinery<sup>15,18,19</sup>. Second, EJCs serve as a signal for nonsense-mediated mRNA decay  
80 (NMD), when translation termination occurs before the last exon-exon junction. Thus,  
81 NMD couples the translation and degradation machineries to eliminate transcripts  
82 encoding truncated proteins or to regulate the stability of specific transcript in a  
83 translation-dependent manner<sup>20</sup>.

84 The implication of EJCs in several crucial steps of gene expression explains why  
85 its components are essential for cellular viability<sup>21</sup>. In several organisms, a precise dosage  
86 of EJC components is required for proper development<sup>22-28</sup>. In humans, mutations leading  
87 to hypomorphic expression of Y14 and eIF4A3 are associated to two distinct syndromes

88 with common neurodevelopmental phenotypes<sup>29</sup>. The thrombocytopenia with absent  
89 radius (TAR) syndrome is associated with a reduction of Y14 expression and it presents  
90 some defects in limb development and platelet production<sup>30</sup>. In the case of eIF4A3, it is  
91 linked to the autosomal recessive Richieri-Costa-Pereira syndrome (RCPS) presenting  
92 both limb and craniofacial dysmorphisms<sup>31</sup>. Copy number variants of EJC and NMD  
93 factors were also found in patients with intellectual disabilities<sup>32</sup>. A major step in  
94 understanding the link between EJC dosage affection and brain development and function  
95 in mammals derived from mouse genetics. A pioneer mutagenesis screen unraveled that  
96 MAGOH haploinsufficiency results in smaller body size and microcephaly by regulating  
97 division of Neural Stem Cells (NSC)<sup>33</sup>. A conditional *Magoh* allelic knock-out leading  
98 to NSC-specific reduction in MAGOH expression confirmed its importance for cortical  
99 development. In these cells, NSC mitosis is delayed, leading to a decrease of intermediary  
100 progenitors (IP), a premature generation of neurons and an increased apoptosis of their  
101 progeny<sup>33-35</sup>. Remarkably, the generation of *Rbm8a* (encoding Y14) as well as *eIF4A3*  
102 conditional haplo-insufficiency in mNSC phenocopied the effects observed with *Magoh*  
103 on embryonic neurogenesis, with a notable microcephaly<sup>36,37</sup>. However, a *Mln51*  
104 conditional haploinsufficiency only partially phenocopied the three other EJC core  
105 components with less profound neurodevelopmental disorders, suggesting a more tissue-  
106 specific involvement of MLN51<sup>38</sup>. EJC-associated NMD factors have also been  
107 associated to NSC maintenance and differentiation<sup>39-41</sup>. A proper dosage of fully  
108 assembled EJCs, and not only its free components, is thus clearly essential for NSC  
109 division, differentiation and brain development. However, the precise mechanisms at play  
110 remain elusive.

111         These observations prompted us to study EJC core proteins in primary cultures  
112 of radial glial mNSC, which are quiescent monociliated cells. Centrosomes are composed  
113 of a pair of centrioles and a matrix of pericentriolar material (PCM) that nucleates  
114 microtubules and participates in cell cycle and signaling regulation<sup>42</sup>. When cells exit the  
115 cell cycle, the centriole pair migrates to the cell surface, and the mother centriole  
116 constitutes a basal body for primary cilium formation<sup>42</sup>. We observed that EJC core  
117 proteins concentrate around centrosomes at the base of primary cilia both in mNSCs and  
118 human retinal pigment epithelial (RPE1) cells. This centrosomal accumulation of EJC  
119 proteins is predominant during the quiescent state as it diminishes upon cell

120 differentiation or cell-cycle re-entry. The accumulation of EJC complexes around  
121 centrosomes is RNA-dependent and ensured by a microtubule-dependent pathway. A  
122 single molecule FISH (smFISH) screen identifies two mRNAs, *NIN* and *BICD2*  
123 localizing at centrosome in quiescent RPE1 cells. Remarkably, both EJC and translation  
124 are essential for *NIN* mRNA localization. Down-regulation of EJC impaired ciliogenesis  
125 and organization of the PCM, establishing a potential link between the molecular and  
126 physiological functions of the EJC.

127

## 128 **Results**

129

### 130 **EIF4A3 and Y14 label centrosomes in quiescent mNSC**

131 Reduced expression of any of the EJC core components in mice induces defects  
132 in NSC division and differentiation<sup>29</sup>. This prompted us to study the expression of EJC  
133 core proteins in mNSCs. We first investigated primary cultures of glial progenitors  
134 isolated from newborn mice forebrain<sup>43</sup>. Upon serum starvation, quiescent mono-ciliated  
135 radial glial cells differentiate into ependymal cells<sup>44</sup>. Ependymal cells are multi-ciliated  
136 and are present at the surface of brain ventricles. Beating of their cilia contributes to the  
137 flow of cerebrospinal fluid. In radial glial cells, the primary cilium grows from the basal  
138 body docked at the membrane. During differentiation, amplification of centrioles leads to  
139 the production of multiple cilia at the surface of ependymal cells<sup>45</sup>.

140 Antibodies against FGFR1 Oncogene Partner (FOP) label the distal end of  
141 centrioles of mono and multiciliated cells and the pericentriolar area<sup>46,47</sup>, whereas  
142 antibodies against polyglutamylated tubulin decorate both centrioles and cilia<sup>48</sup>. Both  
143 antibodies clearly distinguished the mono- (Fig. 1a, c) and multi-ciliated (Fig. 1b, d) states  
144 of mNSCs and ependymal cells, respectively. We investigated the localization of the EJC  
145 core components eIF4A3 and Y14. As previously observed in other cells<sup>49-51</sup>, eIF4A3  
146 and Y14 were mainly nuclear in both mono- and multi-ciliated mNSCs (Fig. 1a-d).  
147 However, we noticed that both eIF4A3 and Y14 concentrate around the centrosome at the  
148 base of primary cilia in the majority of quiescent mNSCs (Fig. 1a, c, e-h and  
149 Supplementary Fig. 1a, b). In contrast, ependymal cells do not show a strong eIF4A3 and  
150 Y14 staining around centrioles (Fig. 1b, d, e-h and Supplementary Fig. 1c-d). The reduced

151 concentration of both proteins around centrioles in ependymal cells was not due to an  
152 overall lower expression of the two proteins as the nuclear signals of eIF4A3 and Y14  
153 increased by 1.5 fold in ependymal cells compared to quiescent mNSCs (Supplementary  
154 Fig. 1e, f).

155 Together, these data showed that at least two EJC core proteins accumulate in the  
156 vicinity of centrioles in monociliated mNSCs and this cytoplasmic localization decreases  
157 upon differentiation into ependymal cells.

158

### 159 **EJC core components accumulate around centrosomes in ciliated quiescent RPE1** 160 **cells**

161 To test the generality of this observation, we investigated the localization of EJC  
162 core proteins in the telomerase-immortalized Retinal Pigment Epithelial cell line hTERT-  
163 RPE1 (RPE1 cells), a popular cellular model to study primary cilia <sup>52,53</sup>. After 2 days of  
164 serum starvation, around 80% of RPE1 cells possessed a primary cilium, compared to  
165 only 9% in proliferating cells cultivated with serum (Fig. 2a-c). Y14 and MAGOH form  
166 a stable and obligated heterodimer <sup>54,55</sup>. Given that no antibodies against MAGOH  
167 provided specific immunofluorescence signals, we did not analyze MAGOH localization.  
168 And, as previously observed in other cells <sup>51,56</sup>, MLN51 is mainly detected in the  
169 cytoplasmic compartment of RPE1 cells (Supplementary Fig. 2e, f). It generated a  
170 background preventing the detection of its potential enrichment around centrosomes. As  
171 expected, eIF4A3 and Y14 were mainly localized in the nuclear compartment where they  
172 concentrated in nuclear speckles, corresponding to punctuate domains enriched in  
173 splicing factors and labeled by SC35 and/or 9G8 antibodies (Fig. 2a, b, Supplementary  
174 Fig. 1g-j and Supplementary Fig. 2a, b). Remarkably, in a large fraction of quiescent  
175 RPE1 cells, eIF4A3 and Y14 also concentrated around centrioles (Fig. 2a,d and  
176 Supplementary Fig. 2a, c). In contrast, eIF4A3 and Y14 were not accumulating around  
177 the centrosome of proliferating cells (Fig. 2b and Supplementary Fig. 2b). The relative  
178 fluorescence intensity of eIF4A3 and Y14 around centrosome was 1.5 times higher in  
179 quiescent cells than in proliferating cells (Fig. 2e and Supplementary Fig. 2d). In  
180 quiescent RPE1 cells, eIF4A3 and Y14 both accumulate around centrosomes at the base  
181 of primary cilia like in quiescent NSC.

182 We next investigated cell cycle-dependent localization of EJC proteins. For this,

183 we followed eIF4A3 and Y14 signals during a 24h time-course triggered by serum  
184 addition to quiescent RPE1 cells (Fig. 2f-h and Supplementary Fig. 3a, b). As previously  
185 reported<sup>57</sup>, the proportion of monociliated cells decreased following a two-steps mode,  
186 with roughly 20% of ciliated cells left after 24 hours (Fig. 2g). The amount of eIF4A3  
187 and Y14 started to decrease after 8 hours of serum addition and was similar to the amount  
188 observed in unsynchronized proliferating cells (Fig. 2f, h and Supplementary Fig. 3a, b).  
189 As the number of cells in S phase peaked at 16 hours after serum addition, accumulation  
190 of EJC proteins around centrosomes most likely declined during the S phase  
191 (Supplementary Fig. 3c, d).

192 Serum starvation is a kind of stress that can induces translational repression<sup>58-61</sup>.  
193 A short sodium arsenite treatment induced the formation of stress granules detected by  
194 TIA-1 and eIF4E antibodies (Supplementary Fig. 4a, b). However, EJC accumulation  
195 around centrosome did not correspond to stress-induced foci because serum starvation  
196 did not lead to accumulation of the stress granule protein TIA-1 in RPE1 cells. We also  
197 investigated the impact of translation inhibition by incubating RPE1 cells with either  
198 puromycin that dissociates translating ribosomes or cycloheximide that stalls elongating  
199 ribosomes onto mRNAs. Both treatments weakly increased the centrosomal accumulation  
200 of eIF4A3 and Y14 in quiescent RPE1 cells and had little effect in proliferating cells  
201 (Supplementary Fig. 4c-j). Therefore, the concentration of EJC proteins at the base of  
202 RPE1 primary cilia does not result from stress or partial translation inhibition triggered  
203 by serum starvation.

204

### 205 **RNA-dependent accumulation of assembled EJCs around centrosomes**

206 One question raised by these results was whether eIF4A3 and Y14 accumulate  
207 around centrosomes independently or not. Dual labeling of eIF4A3 and Y14 showed that  
208 they colocalize around centrosomes (Fig. 3a). The relative fluorescence intensities of  
209 eIF4A3 and Y14 followed similar patterns when plotted along lines crossing either  
210 nuclear speckles where the EJC subunits are concentrated (Fig. 3b), or centrosomes (Fig.  
211 3c). Analysis of 60 individual centrosomes and speckles indicated a very high correlation  
212 of localization of the two proteins in both places (Fig. 3d). To further support the  
213 hypothesis that eIF4A3 and Y14 co-exist in assembled EJCs near centrosomes in  
214 quiescent cells, we down-regulated the expression of either eIF4A3 or Y14 by RNA

215 interference. RT-qPCR, Western blotting and immunofluorescence monitoring showed  
216 that silencing of one protein did not affect the expression of the other one (Fig. 3e-i and  
217 Supplementary Fig. 5a, b). In contrast, down-regulation of Y14 strongly reduced eIF4A3  
218 intensity around centrosomes (Fig. 3h, j), and conversely down-regulation of eIF4A3  
219 strongly reduced Y14 accumulation around centrosomes (Supplementary Fig. 5a, c).

220 Since EJC complexes are assembled onto RNA<sup>12,51</sup>, we next investigated whether their  
221 presence around centrosomes depends on RNA. Quiescent RPE1 cells were  
222 permeabilized, incubated with RNase A before fixation and stained with antibodies. As a  
223 positive control, we showed that the number of P-bodies (cytosolic RNP granules  
224 involved in mRNA storage<sup>62</sup>) was reduced by 4 fold upon such treatment (Supplementary  
225 Fig. 5d-f). This short RNaseA treatment slightly reduced the amount of eIF4A3 and Y14  
226 in the vicinity of these foci (Supplementary Fig. 5j, k), as expected given that EJC complexes are  
227 assembled around nuclear speckles<sup>51</sup>. Remarkably, RNase A strongly reduced the amount  
228 of both eIF4A3 and Y14 around centrosomes (Fig. 3k, l and Supplementary Fig. 5g-i).

229 Together, the interdependent centrosomal colocalization of eIF4A3 and Y14, and  
230 its susceptibility to RNase strongly support that these proteins accumulate around  
231 centrosomes of quiescent cells as part of assembled EJC complexes.

232

### 233 **Microtubule-dependent transport of centrosomal EJC complexes**

234 Multiple mechanisms allow the transport and/or the concentration of transcripts  
235 in specific cellular locations<sup>63</sup>. Active transport of mRNP particles notably use  
236 cytoskeleton structures<sup>64,65</sup>. Centrosomes function as the major microtubule-organizing  
237 centers<sup>42</sup>. Therefore, we first questioned whether the accumulation of EJC complexes around  
238 centrioles in quiescent cells relies on the microtubule network. When quiescent RPE1  
239 cells were treated with nocodazole for two hours, a well-known microtubule destabilizer,  
240 microtubules disappeared (Supplementary Fig. 6a, b). However,  $\beta$ -tubulin  
241 immunostaining of both centrioles and cilia was not significantly affected (Fig. 4a). In  
242 contrast, this treatment reduced the fluorescence intensities of eIF4A3 and Y14 around  
243 centrosomes, by 60% and 50% respectively (Fig. 4a, d and Supplementary Fig. 6d, g).  
244 These observations indicate that EJC complexes accumulate around centrosomes in a microtubule-  
245 dependent manner. Given that centrosomes nucleate the minus-ends of microtubules,  
246 minus-end directed motors and notably cytoplasmic dynein might transport EJC-bound



247 particles to centrosomes. To test this hypothesis, we incubated quiescent RPE1 cells for  
248 90 min with Ciliobrevin D, a cell-permeable inhibitor of dynein. Indeed, such treatment  
249 efficiently disrupted the Golgi network immunostained with GM130 antibodies, as  
250 previously reported<sup>66</sup> (Supplementary Fig. 6c). Interestingly, the Ciliobrevin D treatment  
251 also reduced the fluorescence intensities of eIF4A3 and Y14 around centrosome by 40 %  
252 (Fig. 4b, e and Supplementary Fig. 6e, h) showing that centrosomal EJC concentration  
253 requires dynein motors.

254 Microtubules form a dynamic network undergoing permanent polymerization  
255 and depolymerization. To further investigate the dynamic aspect of EJC transport to  
256 centrosomes, we performed microtubule regrowth assays. When quiescent cells were ice-  
257 chilled, the microtubule network labeled with  $\beta$ -tubulin or  $\alpha$ -tubulin antibodies almost  
258 completely disappeared, and the amounts of centrosomal eIF4A3 and Y14 were reduced  
259 by 2 fold (Fig. 4c, f and Supplementary Fig. 6f, i). Placing cells back at 37°C induced  
260 microtubule regrowth. Already one minute after addition of 37°C media, astral structures  
261 reappeared at microtubule organizing centers and 15 minutes later, the microtubule  
262 network was almost completely reconstituted (Fig. 4c and Supplementary Fig. 6f).  
263 Remarkably, the intensity of eIF4A3 and Y14 at centrosome already increased after one  
264 minute back at 37°C and reached almost initial levels after 15 minutes (Fig. 4c, f and  
265 Supplementary Fig. 6f, i).

266 Together, these data indicated that an important proportion of EJC complexes  
267 are rapidly transported to centrosomes of quiescent RPE1 in a microtubule- and dynein-  
268 dependent manner.

269

## 270 **Basal body localization of *NIN* mRNAs but not *BICD2* mRNAs is both EJC- and** 271 **translation-dependent**

272 Finding EJCs assembled on RNA prompted us to search for transcripts localized  
273 around centrosomes in ciliated RPE1 cells. We used a high-throughput smFISH strategy  
274 (schematized in Fig. 5a; see also Safieddine et al.<sup>67</sup>) to screen about 700 mRNAs  
275 encoding centrosome- and cilium-related proteins (Supplementary Table 1). Briefly, we  
276 generated 50 to 100 distinct single-stranded RNA probes for each mRNA. The probes  
277 were flanked by two overhangs that hybridize with fluorescently labeled locked nucleic  
278 acids (LNA). The probe mixtures were hybridized on fixed cells following a smFISH

279 procedure as described previously <sup>68</sup>. We used RPE1 cells stably expressing centrin1-  
280 GFP for centrosome labeling and antibodies against Arl13b to stain primary cilia (Fig.  
281 5a and Supplementary Fig. 7a). Among the different mRNAs investigated, we found 21  
282 mRNAs that exhibit non-random intracellular distribution (Supplementary table 1). For  
283 example, *CHD3* (Chromodomain Helicase DNA binding protein 3; a component of  
284 NuRD chromatin remodeling complex <sup>69</sup>) accumulated in cytoplasmic protrusions while  
285 *NEK9* mRNA (also known as *Nercc1*; serine/threonine kinase controlling centrosome  
286 separation during prophase <sup>70</sup>) was distributed randomly throughout the cytoplasm  
287 (Supplementary Fig. 7a). Among the different mRNAs investigated, 18 mRNAs  
288 exhibited non-random intracellular distribution. Remarkably, two mRNAs, *BICD2* and  
289 *NIN*, specifically concentrated around centrosomes at the base of cilia (Supplementary  
290 Fig. 7a). Bicaudal D2 (*BICD2*) is a dynein adaptor involved in RNP particles and  
291 vesicles trafficking along microtubule network <sup>71</sup>. Ninein (*NIN*) is a core component of  
292 centrosomes required for microtubule nucleation and anchoring to centrosome <sup>72,73</sup>.  
293 While we screened a large fraction of mRNAs corresponding to the centrosomal and  
294 cilium proteomes, the screen was not exhaustive. Hence, additional mRNAs might  
295 localize there (see Discussion).

296 Next, to determine whether *BICD2* and *NIN* transcripts were associated to EJsCs,  
297 we performed RNA immunoprecipitations. RT-qPCR showed that both transcripts were  
298 efficiently and specifically precipitated with eIF4A3 and Y14 antibodies but not with  
299 antibodies against the unrelated protein Rab5 (Supplementary Fig. 8a). This enrichment  
300 was specific because the intron-less *SFM3B5* and *SDHAF1* transcripts were not  
301 precipitated under the same conditions (Supplementary Fig. 8a). Therefore, a significant  
302 proportion of *BICD2* and *NIN* mRNAs are bound to EJsCs in quiescent RPE1 cells.

303 We next tested whether the localization of *BICD2* and *NIN* mRNAs was EJC-  
304 dependent. Neither eIF4A3 or Y14 knock-down affected the centrosomal localization of  
305 *BICD2* mRNA (Fig. 5b, d). In contrast, both knock-downs strongly perturbed *NIN* mRNA  
306 localization that became more dispersed (Fig. 5c, e). Measurement of *NIN* mRNAs  
307 expression by RT-qPCR showed that EJC knock-downs did not alter its overall expression  
308 (Supplementary Fig. 8b). Therefore, EJsCs actively participates to the centrosomal  
309 localization of *NIN* transcripts.

310 We and others previously observed that the localization of *PCNT* and *ASPM*

311 mRNAs to centrosome during early mitosis is translation-dependent<sup>74,75</sup>. Although  
312 cycloheximide treatment had no effect, puromycin treatment prevented the accumulation  
313 of both *NIN* and *BICD2* mRNAs around centrosomes in quiescent RPE1 cells  
314 (Supplementary Fig. 7b-e).

315 Taken together, our data suggest that EJCs contribute to the transport and  
316 localization at centrosomes of *NIN* transcripts undergoing translation, whereas the  
317 localization of *BICD2* mRNA only requires translating ribosome.

318

### 319 **EJC protein depletion impairs both centrosome organization and ciliogenesis**

320 Ninein (*NIN*) is a core component of centrosomes located at the proximal end of  
321 each centriole and at sub-distal appendages of mother centrioles. It contributes to  
322 microtubule nucleation and anchoring to centrosomes<sup>72,73</sup>. We investigated the *NIN*  
323 protein by immunofluorescence. We found that either eIF4A3 or Y14 knock-down  
324 reduced by half the amount of *NIN* protein detected around centrosomes (Fig. 6a, b). This  
325 observation prompted us to analyze other centrosomal components. We observed that  
326 knock-down of either eIF4A3 or Y14 also had a strong effect on PCM-1 and FOP  
327 localizations in quiescent RPE1 cells (Fig. 6c-e). In control cells, PCM-1 labeling showed  
328 that the PCM and centriolar satellites were mainly concentrated around centrioles and  
329 radially distributed from the centrosome in a punctuated manner. eIF4A3 knock-down led  
330 to the appearance of PCM-1 dots a few microns away from centrioles, with a dispersed  
331 and scattered pattern. A Y14 knock-down had the same impact though less pronounced.  
332 In control cells, FOP staining was very focused although an extended punctuated staining  
333 is seen in 15% of the cells. However, such an extended punctuated FOP staining was  
334 observed in 80% of the cells after knock-down of either eIF4A3 or Y14 (Fig. 6c, d). The  
335 specific role of EJC in centrosome organization was further supported by the fact that  
336 down regulation of MAGOH showed similar effects (Supplementary Fig. 9). In contrast,  
337 the down-regulation of MLN51 showed no impact suggesting that EJC-related functions  
338 of MLN51 are most likely transcript and/or cell-specific, as previously reported<sup>38,76</sup>. Thus,  
339 EJC depletion triggers defects in centriolar satellite transport.

340 We also observed that eIF4A3 or Y14 knock-downs reduced both the  $\gamma$ -tubulin  
341 and PCNT fluorescence intensities at centrosomes (Supplementary Fig. 8c-e), in

342 agreement with the fact that NIN and PCM-1 are important for deposition of  $\gamma$ -tubulin  
343 and PCNT on centrosome, respectively<sup>72,77</sup>. However, although EJC knock-down impairs  
344 the localization of some centrosome components, it did not induce major changes in the  
345 microtubule network revealed by  $\beta$ -tubulin labeling (Supplementary Fig. 8f).

346 Ciliogenesis is linked to basal body integrity. As knock-down of either eIF4A3  
347 or Y14 decreased the number of ciliated cells by more than 50% (Fig. 6c, e), an imbalance  
348 in EJC dosage in quiescent RPE1 cells strongly impairs both the organization of  
349 centrosomes and ciliogenesis.

350

## 351 **Discussion**

352 Here, we show the accumulation of EJC core proteins around basal bodies, which  
353 are formed by centrioles at the base of cilia. This was observed both in primary mNSCs  
354 and quiescent RPE1 cells. These EJC proteins are assembled on RNA and localized in a  
355 microtubule-dependent manner revealing the enrichment of untranslated or partially  
356 translated EJC-bound transcripts at centrosomes. A large smFISH screen identifies  
357 *BICD2* and *NIN* mRNAs near the base of primary cilia in quiescent RPE1 cells. Knock-  
358 down of any EJC core protein prevents *NIN* mRNAs transport but not *BICD2* mRNAs  
359 transport. Thus, the EJC plays a crucial role for the spatial enrichment of specific mRNAs  
360 at a specific location in human cells. In addition, we provide evidences that an EJC  
361 imbalance affects the centrosomal accumulation of *NIN* protein and other structural  
362 components such as pericentrin and PCM1. Thus, the EJC is associated to defects in  
363 centrosomal organization and ciliogenesis.

364 We provide several complementary evidences that assembled EJCs accumulate  
365 in a RNA-dependent manner around basal bodies. EJCs are deposited by the nuclear  
366 splicing machinery and remain stably bound to transcripts until their translation in the  
367 cytoplasm<sup>15,17</sup>. So far, there is no evidence that a splicing-independent EJC assembly  
368 may occur. Therefore, the RNA-dependent enrichment of EJCs at the centrosomes signals  
369 the local concentration of spliced transcripts both in mNSC and in human RPE1. Previous  
370 studies reported the presence of RNAs in the centrosomal area in different organisms  
371 including *Tetrahymena pyriformis*, *Paramecium tetraurelia*, *Spisula solidissima*,  
372 *Ilyanassa obsoleta*, *Dano rerio*, *Xenopus laevis* and *Drosophila melanogaster*<sup>74,78-81</sup>.

373 More recently, four transcripts encoding the central PCM component, Pericentrin (PCNT),  
374 Abnormal spindle-like microcephaly-associated protein (ASPM), the nuclear mitotic  
375 apparatus protein 1 (NUMA1) and the Hyaluronan Mediated Motility Receptor (HMMR)  
376 were detected by single molecule approaches around centrosome of HeLa cells during  
377 cell division <sup>67,74,75</sup>. Here, we identified *BICD2* and *NIN* transcripts as two additional  
378 mRNAs concentrated around centrosome at the base of cilia in quiescent RPE1 cells.  
379 *BICD2*, an activating adaptor of dynein, participates to the traffic of both Golgi vesicles  
380 and RNP particles along microtubules <sup>71</sup>. Ninein, localized to the proximal end of both  
381 mother and daughter centrioles, is a core component of subdistal appendages of mother  
382 centrioles <sup>73</sup>. Ninein is important for both microtubule anchoring and nucleation at the  
383 centrosome<sup>72</sup>. The presence of several transcripts around centrosomes at different stages  
384 of the cell cycle <sup>74,75</sup>, the detection of centrosomal EJCs in proliferating cells and their  
385 accumulation during quiescence are all echoes of a major, spatially restricted and dynamic  
386 post-transcriptional program crucial for the centrosome functions, both during cell  
387 division and cilia formation.

388 Various mechanisms can lead to mRNP enrichment at particular subcellular  
389 locations such as an active transport along cytoskeletal tracks, passive diffusion coupled  
390 to site specific anchoring or local protection from degradation <sup>63,64,82</sup>. It has long been  
391 considered that most localized mRNPs are transported in a translationally repressed state  
392 to prevent ectopic expression of the encoded protein and/or favor the assembly of protein  
393 complexes. However, there are growing evidences of widespread co-translational  
394 transports <sup>83,84</sup>. Recently, a large dual protein-mRNA screen in human cells revealed that  
395 the majority of the transcripts displaying specific cytoplasmic locations reach their  
396 destination in a translation-dependent manner <sup>75</sup>. Co-translational mRNA transport is  
397 notably essential for the targeting of membrane and secreted proteins to the endoplasmic  
398 reticulum. In this case, the cytosolic translation of transcripts is arrested after translation  
399 of a signal sequence that mediates the transport of the ribosome-bound mRNP to the  
400 endoplasmic reticulum where translation resumes after translocation of the nascent  
401 polypeptide <sup>85</sup>. The delivery of *PCNT* and *ASPM* mRNAs to centrosomes requires active  
402 polysomes as well as microtubules and dynein activity <sup>74,74</sup>, and direct visualization of  
403 single polysomes in live cells with the SunTag showed that the ASPM and NUMA1  
404 polysomes are actively transported to mitotic centrosomes <sup>67</sup>. Recently, a large dual

405 protein-mRNA screen in human cells revealed that the majority of the transcripts  
406 displaying specific cytoplasmic locations reach their destination in a translation-  
407 dependent manner<sup>75</sup>. Here, we complete this list by showing that the accumulation *NIN*  
408 and *BICD2* mRNA around centrosome at the base of primary cilia is highly sensitive to  
409 puromycin treatment but not to cycloheximide treatment (Supplementary Fig. S7),  
410 strongly suggesting that nascent peptides are necessary for correct targeting. *BICD2* and  
411 *NIN* proteins are direct partners of dynein<sup>86</sup> and the N-terminal region of Ninein is  
412 important for protein targeting to mother centrioles<sup>72</sup>. It is tempting to speculate that  
413 *BICD2* and *NIN* nascent peptides somehow contribute to the co-translational and dynein-  
414 dependent delivery of their transcripts to achieve protein synthesis at their final  
415 destination.

416 So far, only one example of transcript localization requiring the EJC is known. It  
417 is the *oskar* mRNA that is transported from nurse cells to the posterior pole of *Drosophila*  
418 *melanogaster* oocytes<sup>18</sup>. Here, we report a second EJC-dependent localized transcript, the  
419 *NIN* mRNA. It is the first described in mammals, revealing that this phenomenon is not  
420 an exception restricted to fly. The EJC is likely involved in the subcellular localization of  
421 other transcripts yet to be identified. Multiple cis- and trans-acting factors participate to  
422 the active transport and the translational repression of *oskar* mRNP before it reaches the  
423 posterior pole of embryo where the protein Osk is produced<sup>63,87,88</sup>. In this multistep  
424 pathway, the EJC is only one of the actors and its precise role remains unclear. In contrast  
425 to *oskar* mRNA, the localization of *NIN* mRNA requires ongoing translation in addition  
426 to the EJC. The combination of these two signals is at first surprising because EJCs  
427 deposited on the mRNA ORF are expected to be disassembled by scanning ribosomes.  
428 Ribosomes might be halted before reaching the end of the *NIN* mRNA ORF. The  
429 differential sensitivity of *NIN* mRNA localization to cycloheximide and puromycin,  
430 suggests that a nascent *NIN* polypeptide bound to halted ribosomes cooperates with  
431 downstream EJCs for *NIN* mRNA targeting to centrosome where translation would  
432 resume. It is also worth noting that *NIN* mRNA is 10 kb long and has 50 introns, thus  
433 possibly requiring a particular EJC-driven packaging for transport. Although the  
434 molecular mechanisms involved remain unclear, the differential EJC-requirement for  
435 *BICD2* and *NIN* mRNAs localization indicate that different pathways orchestrate the  
436 ballet of transcripts accumulating around centrosome during the different phases of the

437 cell cycle<sup>74,75</sup> (Fig. 7).

438 In quiescent cells, the oldest centriole of the centrosome converts into a basal  
439 body that nucleates a non-motile primary cilium. This organelle serves as a cellular  
440 antenna and constitutes a signaling hub for both chemical and mechanical external stimuli  
441 leading to cell-fate decisions such as cell cycle re-entry or cell differentiation<sup>89</sup>. In the  
442 brain, primary cilia sense signaling molecules present in the cerebral spinal fluid<sup>90</sup>.  
443 Untranslated and partially translated mRNAs unmasked by EJCs and parked around the  
444 basal body might wait for external signals to synthesize their protein products on request  
445 and contribute to centrosome organization, ciliogenesis and cilia functions. Here, we  
446 show that downregulation of EJC core factors in RPE1 cells affects the localization of  
447 *NIN* mRNAs and consequently, the amount of NIN protein at centrosomes (Fig. 6).  
448 Furthermore, it leads to centriolar satellite scattering, pericentriolar  
449 assembly/composition defects and to abnormal ciliogenesis (Fig. 6 and Supplementary  
450 Fig. 9). Centriolar satellites are dynamic granules transported towards centrosomes along  
451 microtubules by a dynein-dependent mechanism<sup>91</sup> that are essential for centrosome  
452 assembly as well as ciliogenesis<sup>77,92</sup>. Therefore, the targeting of EJC-bound transcripts  
453 such as *NIN* mRNA toward centrosomes and possibly their local translation is critical for  
454 centrosome structure and cilia formation.

455 Brain development is particularly susceptible to centrosome dysfunction and  
456 defects in several centrosome components are associated with microcephaly<sup>93,94</sup>.  
457 Interestingly, mouse haplo-insufficiencies in EJC core factors are all associated with  
458 defects in neural stem cell division<sup>29,37</sup>. A reduction in intermediary progenitors and an  
459 increased apoptosis of progeny are observed and result in neurogenesis defaults and  
460 ultimately microcephaly. In addition, a deficient Ninein expression in embryonic mouse  
461 brain causes premature depletion of progenitors<sup>95</sup>. Thus, it is tempting to speculate that  
462 EJC-linked neurodevelopmental abnormalities observed in mouse models as well as in  
463 human syndromes at least in part originate from centrosomal and primary cilia  
464 dysfunctions in NSC, triggered by a defective post-transcriptional EJC-dependent gene  
465 regulation.

466

467

## 468 **Acknowledgements**

469

470 We thank Alice Lebreton and Dominique Weil for antibodies and Alexandre Benmerah  
471 for RPE1 cells. We thank Olivier Bensaude for critical readings of the manuscript and  
472 scientific discussions, and Nathalie Delgehyr for scientific inputs. This study was  
473 supported by the ANR (Agence Nationale de la Recherche), with the grants differEnJCe  
474 (ANR-13-BSV8-0023), spEJCificity (ANR-17-CE12-0021) to HLH, Hi-FISH (ANR-14-  
475 CE10-30) to EB, by FRM (Fondation pour la Recherche Médicale; grant bioinformatics)  
476 to EB, by LNCC (Ligue Nationale Contre le Cancer to EB (equipe labélisée), by the  
477 European Commission (Marie Curie ITN RNPnet) to HLH, the European Research  
478 Council (ERC Consolidator grant 647466) to NS, by the program «Investissements  
479 d’Avenir» launched by the French Government and implemented by ANR (ANR–10–  
480 LABX-54 MEMOLIFE and ANR–10–IDEX–0001–02 PSL\* Research University) to  
481 HLH and NS, and by continuous financial support from the Centre National de Recherche  
482 Scientifique, the Ecole Normale Supérieure and the Institut National de la Santé et de la  
483 Recherche Médicale, France.

484

## 485 **Author contribution statement**

486

487 HLH, NS and OSK conceived the project. RM and MF prepared primary cell cultures of  
488 mNSC and their differentiation into ependymal cells. OSK, RM and MF performed  
489 immunofluorescence microscopy on mNSC. OSK conducted immunofluorescence  
490 microscopy on RPE1 cells. IB performed Western blotting and QA performed RIP. AS  
491 and EC performed high-throughput smFISH screen. OSK performed microtubule  
492 regrowth assays, Sunset analyses, flow cytometry experiments, smFISH experiments, all  
493 RPE1 treatments, image analyses including quantifications. EB, HLH, NS, OSK and RM  
494 analyzed the data. OSK prepared the Figures. OSK and HLH wrote the manuscript that  
495 was reviewed and edited by EB and NS.

496

## 497 **Conflict of interest disclosure**

498



499 The authors declare no competing financial interests.

500

## 501 **Figure legends**

502

### 503 **Figure 1. EJC core components, eIF4A3 and Y14, strongly localize around** 504 **centrosomes in quiescent mNSC, but not in differentiated ependymal cells.**

505 Quiescent mNSC (a,c) and multiciliated ependymal cells (b, d) were stained for eIF4A3  
506 (a, b) or Y14 (c, d). Centrosomes were labeled by FOP antibody. Primary cilia and  
507 centriole were stained by poly-glutamylated tubulin antibody. Nuclei were stained by  
508 Hoechst. Images result from maximum intensity projections of 12 z-stacks acquired at  
509 every 0.5  $\mu\text{m}$ . Lower panels show enlarged images that are marked by white dashed  
510 square in the upper panel. Scale bars in the upper and lower panels are 5  $\mu\text{m}$  and 3  $\mu\text{m}$ ,  
511 respectively. Fluorescence intensities for eIF4A3 (e) and for Y14 (h) were quantified in 2  
512  $\mu\text{m}$  circles around centrosomes and plotted as fluorescence intensities relative to the  
513 average fluorescence intensity in quiescent mNSC (set as 1.0). The red lines mark the  
514 median values and values between the 25th lower percentile and 75th higher percentile  
515 are in the box. Whiskers above and below the box correspond 0.35th lower percentile and  
516 99.65th higher percentile, respectively. The fraction of cells with detectable centrosomal  
517 eIF4A3 (f) or Y14 (h) was determined in either quiescent mNSC or ependymal cells.  
518 Three independent experiments were performed. The number of cells analyzed for each  
519 independent experiment is provided (e-h). Error bars correspond to S.D. \*\*\*\* P  $\leq$   
520 0.0001, Mann-Whitney test (e, g) and two-tailed t-test (f, h).

521

### 522 **Figure 2. EJC core component accumulates around centrosomes in quiescent RPE1** 523 **cells and decreases upon cell cycle re-entry.**

524 Proliferating (a) and quiescent (b) RPE1 cells and RPE1 cells incubated with 10 % serum  
525 containing media during indicated times after quiescence (f) were stained for eIF4A3.  
526 Centrosomes were labeled by FOP antibody and primary cilia, and centriole were stained  
527 by poly-glutamylated tubulin antibody. Nuclei were stained by Hoechst. Right panels  
528 show enlarged images of the white dashed square in the left panel. Scale bars in the left  
529 panels are 10  $\mu\text{m}$ , and scale bars in right panels are 3  $\mu\text{m}$  (a, b, f). The proportion of  
530 ciliated cells was determined in either proliferating or quiescent cell populations (c) and  
531 the cell populations incubated with serum containing media during indicated incubation

532 times (g). The fraction of cells with detectable eIF4A3 (d) was determined in either  
533 proliferating or quiescent RPE1 cells. Quantifications of eIF4A3 fluorescence intensities  
534 (e, h) were performed as described in the legend of figure 1 except that average  
535 fluorescence intensities of eIF4A3 in proliferating cells (e) and cells with 0 hr incubation  
536 (h) are set to 1.0. Error bars correspond to S.D. n.s  $P > 0.05$ , \*  $P \leq 0.05$ , \*\*  $P \leq 0.01$ , \*\*\*  
537  $P \leq 0.001$ , and \*\*\*\*  $P \leq 0.0001$ , Mann-Whitney test (e, h) and two-tailed t-test (c, d, g).  
538 Three independent experiments were performed.

539

540 **Figure 3. RNA-dependent assembled EJC localize around centrosomes in quiescent**  
541 **cells.**

542 Quiescent RPE1 cells were immunolabeled by eIF4A3 and Y14 (a). Quiescent RPE1  
543 cells transfected with indicated siRNAs (h) and permeabilized quiescent cells incubated  
544 with RNase A or not prior to fixation (k) were stained for eIF4A3. Primary cilia and  
545 centrioles were stained by poly-glutamylated tubulin antibody (a, h, k) and centrosomes  
546 were labeled by FOP antibody (h, k). Nuclei were stained by Hoechst. Lower (a, h) or  
547 right panels (k) show enlarged images of the white dashed square in upper (a, h) or left  
548 panel (k). Images from red and yellow dashed squares in lower panel (a) are depicted in  
549 b and c, respectively. Scale bars in upper (a, h) or left (k) panels and lower (a, h) or right  
550 panels (k) panels are 10  $\mu\text{m}$  and 3  $\mu\text{m}$ , respectively. Relative fluorescence intensity of  
551 eIF4A3 and Y14 along the line on nuclear speckle (b) and centrosome (c) were plotted,  
552 and average fluorescence intensity on the line is set to 1.0. Colocalization of eIF4A3 and  
553 Y14 was analyzed in a 2  $\mu\text{m}$  circle around centrosomes and nuclear speckles (d) and  
554 plotted as described in figure 1 except that perfect colocalization is set to 1.0. Knock down  
555 efficiency of siRNAs was determined by either Western blotting (e) or RT-qPCR (f, g).  
556 Relative protein (e) or RNA level of eIF4A3 (f) and Y14 (g) normalized by GAPDH is  
557 depicted. Error bars correspond to S.D. Relative fluorescence intensities of eIF4A3 in the  
558 nucleus (i) and those for eIF4A3 around centrosome (j, l) were performed as described in  
559 the legends of figure 1 and supplementary figure 1 except that the average fluorescence  
560 intensity of eIF4A3 in Ctrl siRNA (i, j) or buffer (l) treated cells is set to 1.0. n.s  $P > 0.05$ ,  
561 \*  $P \leq 0.05$ , \*\*\*  $P \leq 0.001$ , and \*\*\*\*  $P \leq 0.0001$ , Mann-Whitney test (d, i, j, l) and two-  
562 tailed t-test (f, g). Three independent experiments were performed.

563

564 **Figure 4. An active microtubule-dependent transport is required to maintain EJC**  
565 **localization around centrosomes.**

566 eIF4A3 antibody stained quiescent RPE1 cells treated with either DMSO or Nocodazole  
567 (a), either DMSO or CiliobrevinD (b), and chilled quiescent cells subjected to a  
568 microtubule regrowth assay (c). Centrosomes were labeled by FOP antibody and primary  
569 cilia and centriole were stained by poly-glutamylated tubulin antibody (a, b).  
570 Microtubules were stained by  $\beta$ -tubulin antibody (c). Nuclei were stained by Hoechst.  
571 Lower panels show enlarged images marked by white dashed square in the upper panel.  
572 Scale bars in the upper and lower panels are 10  $\mu$ m and 3  $\mu$ m, respectively. Quantification  
573 of fluorescence intensities of eIF4A3 (d-f) were performed as described in the legend of  
574 figure 1. The average fluorescence intensities for eIF4A3 in DMSO treated cells (d, e) or  
575 in pre-incubated quiescent cells (f) are set to 1.0. n.s  $P > 0.05$ , \*  $P \leq 0.05$ , and \*\*\*\*  $P \leq$   
576 0.0001, Mann-Whitney test. Three independent experiments were performed.

577

578 **Figure 5. EJC is required for centrosomal localization of *NIN* mRNA.**

579 Summary of the high-throughput smiFISH pipeline (a). Top left: primary RNA probes  
580 contain a hybridization sequence that is complementary to the target mRNA flanked by  
581 two overhangs named Flap X and Y. Each Flap was annealed to a locked nucleic acid  
582 (LNA) oligo labeled with two TYE 563 molecules in a pre-hybridization step. Bottom:  
583 Duplexes were then hybridized to the mRNA of interest followed by immunofluorescence  
584 against Arl13b to label primary cilia in 96 well plates. Plates were finally imaged with a  
585 spinning disk confocal microscope. Top right: A micrograph showing a typical field of  
586 view from the screen. Red dots correspond to a single mRNA molecule. Scale bar  
587 represents 10  $\mu$ m. Quiescent RPE1 cells stably expressing centrin1-GFP were stained by  
588 probes against *BICD2* mRNA (b) or *NIN* mRNA (c) after knock-down of either eIF4A3  
589 or Y14. Nuclei were stained by Hoechst. Images are resulted from maximum intensity  
590 projections of 14 z-stacks acquired at every 0.5  $\mu$ m. Right panels show enlarged images  
591 of the white dashed square in the left panels. Scale bars in the left panels are 10  $\mu$ m, and  
592 scale bars in right panels are 3  $\mu$ m (b, c). Proportion of cells displaying centrosomal  
593 *BICD2* (d) or *NIN* (e) RNA pattern was depicted. Error bars correspond to S.D. n.s  $P >$

594 0.05, \*\*  $P \leq 0.01$ , and \*\*\*  $P \leq 0.001$ , two-tailed t-test. Three independent experiments  
595 were performed.

596

597 **Figure 6. Knock-down of EJC components impairs centrosome structure and**  
598 **primary cilia formation.**

599 Quiescent RPE1 cells transfected with siRNAs against eIF4A3 or Y14 were stained for  
600 NIN (a) or PCM1 (centriolar satellite protein), FOP, and poly-glutamylated tubulin (c).  
601 Nuclei were stained by Hoechst. Lower panels are enlarged images marked by white  
602 dashed square in the upper panels. Scale bars in the upper and lower panels are 10  $\mu\text{m}$   
603 and 3  $\mu\text{m}$ , respectively (a, c). Images were processed by maximum intensity projections  
604 of 15 z-stacks acquired at every 0.5  $\mu\text{m}$  (a). Quantification of fluorescence intensities of  
605 NIN were performed as described in the legend of figure 1. The average fluorescence  
606 intensity of NIN in Ctrl siRNA treated cells is set to 1.0 (b). Proportion of cells with  
607 ectopic centriolar satellite with FOP upon the siRNA treatments indicated (d). Proportion  
608 of ciliated cells upon the indicated siRNA treatments (e). Error bars correspond to S.D (d,  
609 e). n.s  $P > 0.05$ , \*\*  $P \leq 0.01$ , \*\*\*  $P \leq 0.001$ , and \*\*\*\*  $P \leq 0.0001$ , Mann-Whitney test (b)  
610 and Two tailed t-test (d, e). Three independent experiments were performed.

611

612 **Figure 7. Multiple pathways for RNA localization toward centrosome.**

613 During quiescence, mother centriole tightly attaches to plasma membrane by distal  
614 appendages to nucleate the formation of primary cilia. To relay the signals from  
615 environment, several receptors are embedded at ciliary membrane. Centriolar satellites  
616 deliver components of centrosome and primary cilia. Centrosomal transcripts could be  
617 localized by ① EJC and/or other RNPs mediated pathway, ② polysome dependent  
618 pathway, and ③ polysome and EJC dependent pathway.

619

620

621

622

## 623 **Materials and methods**

624

### 625 **Animals.**

626 All animal studies were performed in accordance with the guidelines of the  
627 European Community and French Ministry of Agriculture and were approved by the  
628 Direction départementale des Services Vétérinaires de Paris (Approval number  
629 APAFIS#9343-201702211706561 v7). The mice used in this study have already been  
630 described and include: RjOrl:SWISS (Janvier Laboratories).

631

### 632 **Primary ependymal cell cultures and differentiation**

633 mNSC and ependymal cells were prepared following previous reports<sup>43,44</sup>.  
634 Newborn mice (P0–P2) were killed by decapitation. The brains were dissected in Hank's  
635 solution [10 % Hanks balanced salt solution (GIBCO), 5 % HEPES (GIBCO), 5 %  
636 sodium bicarbonate (GIBCO), 1 % penicillin/streptomycin (P/S) (GIBCO)] and the  
637 extracted ventricular walls were manually cut into pieces. The telencephalon was  
638 incubated in enzymatic digestion solution [DMEM glutamax, 2.8 % (v/v) papain  
639 (Worthington 3126), 1.4 % (v/v) of 10 mg/ml DNase I, 2.25 % (v/v) of 12 mg/ml cysteine]  
640 for 45 min at 37 °C in a humidified 5 % CO<sub>2</sub> incubator. Digestion was inactivated by  
641 addition of trypsin inhibitors [Leibovitz Medium L15 (GIBCO), 50 µg/ml BSA, 1 mg/ml  
642 trypsin inhibitor (Worthington), 2 % (v/v) 10 mg/ml DNase I (Worthington)]. Cells were  
643 washed with L15 medium and resuspended by DMEM glutamax supplemented with 10 %  
644 fetal bovine serum (FBS) and 1 % P/S. Ependymal progenitors proliferated until cells are  
645 confluent (4-5 days) in a Poly-Llysine (PLL)-coated flask. Then, cells were shaken (250  
646 rpm) at RT overnight before treatment with trypsin-EDTA. Then,  $1.5 \times 10^5$  -  $2 \times 10^5$  cells  
647 were plated on the PLL coated coverslip and cultivated in DMEM glutamax 10 % FBS,  
648 1 % P/S. The next day, medium was replaced by serum-free DMEM glutamax 1 % P/S,  
649 to trigger ependymal differentiation gradually *in vitro* (DIV 0). Cells were fixed with 4 %  
650 paraformaldehyde at DIV 1 day and DIV 6 day for quiescent mNSC and ependymal cells,  
651 respectively.

652

### 653 **RPE1 cell culture and modulations**

654 RPE1 cells were cultivated in DMEM-F12 1:1 (Invitrogen) supplemented with  
655 10 % of fetal bovine serum (FBS, PAN<sup>TM</sup> BIOTECH), and 1 % penicillin and  
656 streptomycin. To induce quiescence, RPE1 cells were washed twice with DPBS and  
657 incubated for 48 hours with serum free DMEM-F12 <sup>96</sup>. To repress protein synthesis 100  
658  $\mu\text{g/ml}$  of cycloheximide (TOKU-E) and 300  $\mu\text{M}$  of puromycin (InVivoGen) were added  
659 for 2 hours before EJC IF. 100  $\mu\text{g/ml}$  of puromycin was added for 20 mins before  
660 smiFISH. To disrupt microtubules, 3  $\mu\text{g/ml}$  of nocodazole (Sigma) in DMSO was added  
661 to the cells. To prepare immunofluorescence sample,  $5 \times 10^4$  of RPE1 cells were plated  
662 on PLL coated coverslips (VWR) one day before quiescence induction and  $3 \times 10^4$  cells  
663 were plated for proliferating condition.

664

#### 665 **Microtubule regrowth assay**

666 To destabilize the microtubule structure in the cell, quiescent RPE1 cells were  
667 left on ice for 30 min. The cold medium was next replaced with pre-warmed medium and  
668 the cells were incubated in 37°C. After indicated incubation times, cells were washed in  
669 PBS and fixed.

670

#### 671 **siRNA transfection**

672 RPE1 cells plated on day 0 were transfected on day 1 with control siRNAs (5'-  
673 UGAAUUAGAUGGCGAUGUU-3'), eIF4A3 siRNA (5'-  
674 AGACAUGACUAAAGUGGAA-3'), and Y14 siRNA (5'-  
675 GGGUAUACUCUAGUUGAAUUUCAUAUUCACUAGAG-3') with Lipo2000  
676 (Invitrogen) in Optimem (Gibco). After three hours, cells are replaced in DMEM with  
677 FBS and processed on day 4. If required, cells were serum-starved on day 2.

678

#### 679 **Antibodies**

680 For Western blot:  $\alpha$ -Puromycin (Merck 1:12,500),  $\alpha$ -mouse antibody conjugated  
681 with HRP (Bethyl). For immunofluorescence:  $\alpha$ -FOP (Abnova, Mouse IgG2b, 1:1000),  
682  $\alpha$ -Polyglutamylated tubulin (ADIPOGEN, Mouse IgG1, 1:500),  $\alpha$ -Y14 (Santacruz,  
683 mouse IgG2b, 1:50),  $\alpha$ -eIF4A3 (affinity purified from rabbit serum <sup>97</sup>, 1:2000),  $\alpha$ -  
684 MLN51 (affinity purified from rabbit serum <sup>97</sup>, 1:500),  $\alpha$ - $\beta$  tubulin (Biolegend, Mouse

685 1:1000),  $\alpha$ -EDC4 (Santacruz, Mouse, 1:1000),  $\alpha$ -DDX6 (Novus, Rabbit, 1:1000),  $\alpha$ -  
686 Pericentrin (Covance, Rabbit 1:500),  $\alpha$ - $\gamma$ -tubulin (Sigma, Mouse 1:500),  $\alpha$ -PCM1(Cell  
687 signaling, Rabbit 1:600),  $\alpha$ -9G8 (described previously <sup>98</sup>, Rabbit 1:1000),  $\alpha$ -SC35  
688 (described previously <sup>98</sup>, Mouse 1:1000),  $\alpha$ -NIN (Institut curie, Human 1:200), anti-  
689 Arl13b (proteintech, Rabbit, 1:4500)  $\alpha$ -Rabbit Alexa594 (ThermoFisher, 1:400),  $\alpha$ -  
690 Mouse IgG1 Alexa488 (ThermoFisher, 1:500),  $\alpha$ -Mouse IgG2b Alexa647 (ThermoFisher,  
691 1:400),  $\alpha$ -Mouse Alexa488 (Thermofischer, 1:500),  $\alpha$ -Rabbit Cy5 (Jackson  
692 ImmunoResearch, 1:800).

693

#### 694 **SUnSET analysis**

695 Cells were incubated with 4.5  $\mu$ M Puromycin (InvivoGen) for 15 min at 37°C.  
696 After washing with PBS, cells were scraped, pelleted at 0.5 rcf and the pellet was lysed  
697 in RIPA buffer (20 mM Tris-Cl pH 7.5, 150 mM NaCl, 1 mM Na<sub>2</sub>EDTA, 1 mM EGTA,  
698 1 % NP-40, 1 % Sodium deoxycholate) supplemented with protease inhibitor mix  
699 (Millipore). Protein concentrations were determined by Bradford protein assay. 25  $\mu$ g of  
700 proteins was electrophoresed in a 12 % SDS-polyacrylamide gel. Proteins were  
701 electrotransferred onto a 0.2  $\mu$ m nitrocellulose membrane (GE Healthcare) and blocked  
702 with 5 % skim milk in 0.1 % Triton in Tris Buffer Saline (T-TBS) for 30 min at RT. The  
703 membranes were incubated overnight at 4 °C with  $\alpha$ -Puromycin antibody in blocking  
704 solution. An  $\alpha$ -mouse antibody conjugated with HRP was incubated for 2 hours at RT.  
705 Puromycolated peptides were visualized by chemiluminescence with SuperSignal West  
706 Pico PLUS (Thermo Scientific). Total protein on the membrane was stained with  
707 Pierce™ reversible protein stain kit (Thermo) by manufacturer's instruction.

708

#### 709 **Flow cytometry**

710 Cells were trypsinized and resuspended with DPBS. Resuspended cells were  
711 permeabilized by incubating with extraction buffer (0.2 % Triton X-100 in PBS) for 5  
712 min in ice, fixed by incubating with fixation buffer (2 % PFA in PBS) for 15 min in RT  
713 and stored in storage buffer (3 % FBS, 0.09 % sodiumazide in DPBS). Cells were labeled  
714 by 10  $\mu$ g/ml of HOECHST 33258 for 30 min in RT. Cell cycle of cells ( $> 3 \times 10^4$ ) were  
715 determined by HOECHST fluorescence in single cell by ZE5 cell analyzer (BioRad) and



716 data were processed by Flowjo.

717

### 718 **Immunofluorescence**

719 Cells on coverslips were washed with DPBS, fixed with 4 % paraformaldehyde  
720 in PBS for 10 min at RT, permeabilized with 0.1 % Triton X-100 in PBS for 2 min at RT,  
721 blocked with 1 % BSA in PBS for 30 min in RT, incubated for 1 hr with primary antibodies  
722 diluted in blocking solution and nuclei were stained with HOECHST 33258, 1 µg/ml in  
723 blocking solution for 5 min at RT. Coverslips were next incubated with secondary  
724 antibodies for 1 hr in RT and mounted with Fluoromount-G (Invitrogen) on slideglasses.  
725 For RNaseA treatment, RNase A (Sigma) was prepared by dissolving 10 mg/ml RNaseA  
726 in 10 mM Tris-Cl pH 7.5, 15 mM NaCl. To inactivate contaminating DNases, the RNaseA  
727 solution was heated at 98°C for 15 min. Coverslips were washed with PBS followed by a  
728 wash with CSK buffer (10 mM PIPES pH 7.0, 100 mM NaCl, 300 mM sucrose, 3 mM  
729 MgCl<sub>2</sub>) and permeabilized with 0.5% Tween-20 for 5 min at RT. Coverslips were  
730 incubated with 5 mg/ml of RNaseA at 37°C for 15 min and next washed two times with  
731 PBS followed by 10 min incubation with 4 % paraformaldehyde in PBS. Cells were  
732 additionally washed with PBS for three times and immunofluorescence was performed as  
733 described above.

734

### 735 **High-throughput single molecule inexpensive fluorescent *in situ* hybridization with** 736 **immunofluorescence (HT-smiFISH-IF) and conventional smiFISH**

737 The 711 screened genes were selected by their GO term in the "Component"  
738 categorie. We included all human genes whose GO Component included one of the  
739 following term: "centrosome", "centriole", "pericentriolarmaterial", "cilium",  
740 "microtubule","equatorialcellcortex", "midbody", "spindle", "mitoticspindle",  
741 "celldivisionsitepart". This represents 732 human genes and data were obtained for 711  
742 of them.

743 RPE1 cells stably expressing centrin1-GFP were seeded in 96-well glass bottom  
744 plates (Sensoplates, Greiner) and induced quiescence the next day by a 24 hours culture  
745 in Dulbecco's modified Eagle's Medium (DMEM, Gibco) with 0.25% % fetal bovin  
746 e serum (FBS, Sigma-Aldrich). Cells were then directly fixed for 20 min at RT with 4%

747 paraformaldehyde (Electron Microscopy Sciences) diluted in PBS, and permeabilized  
748 with 70% ethanol overnight at 4°C.

749 To generate primary RNA probes used in the high-throughput smiFISH screen and  
750 conventional smiFISH experiments, a pool of DNA oligonucleotides (GenScript) was  
751 used. The oligonucleotide design was based on the Oligostan script<sup>68</sup> with each oligo  
752 having a gene-specific segment that will hybridize to the mRNA of interest, flanked by  
753 two common overhangs named Flap X and Flap Y. Sequence of probes used in screen is  
754 depicted in Supplementary table 2. Briefly, a first series of PCR was performed using  
755 gene-specific barcodes placed at the extremities of each oligo to amplify specific probe  
756 sets using a hot start Phusion DNA Polymerase (Thermo Fisher Scientific, F549L). A  
757 second series of PCR was done to add the T7 RNA polymerase promoter using the  
758 following primers: FLAP Y sequence with the addition of the T7 sequence at its 5' end  
759 (5' TAATACGACTCACTATAGGGTTACACTCGGACCTCGTCGACATGCATT-3'),  
760 and the reverse complement sequence of FLAP X (5'-  
761 CACTGAGTCCAGCTCGAACTTAGGAGG-3'). This PCR reaction was carried out  
762 with GoTaq G2 hot start DNA Polymerase (Promega, F549L). All PCR reactions were in  
763 96-well plates with a Freedom EVO 200 (Tecan) robotic platform. PCR products were  
764 checked by capillary electrophoresis on a Caliper LabChip GX analyzer (PerkinElmer).  
765 The products of the second PCR were purified with a NucleoSpin 96 PCR Clean-up kit  
766 (Macherey-Nagel), lyophilized, and resuspended in DNase/RNase-free distilled water  
767 (Invitrogen). *In vitro* transcription was subsequently performed with T7 RNA Polymerase  
768 and the obtained primary probes were analyzed by capillary electrophoresis using a  
769 Fragment Analyzer instrument (Advanced Analytical).

770 50 ng of primary probes (total amount of the pool of probes) and 25 ng of each of  
771 the secondary probes (LNA oligonucleotides targeting FLAP X and FLAP Y labeled with  
772 TYE 563, Qiagen) were pre-hybridized in either 100µL of 1X SSC for conventional  
773 smiFISH, or in the following pre-hybridization buffer: 1X SSC, 7.5 M urea (Sigma-  
774 Aldrich), 0.34 µg/mL tRNA, 10% Dextran sulfate. Pre-hybridization was performed on a  
775 thermocycler with the following program: 90°C for 3 min, 53°C for 15 min, up until probe  
776 usage. Plates with fixed cells were washed with PBS and hybridization buffer (1X SSC,  
777 7.5 M urea). For conventional smiFISH, the pre-hybridized mixture was diluted in the

778 same pre-hybridization buffer as above. Hybridization was then carried out overnight at  
779 48°C. The next day, plates were washed eight (screen) or three (conventional smiFISH)  
780 times for 20 minutes each in 1xSSC 7.5M urea at 48°C, followed by three PBS rinses.  
781 The samples that were not processed into immunofluorescence were directly mounted on  
782 slide glass with Vectashield mounting medium with Dapi (Vector laboratories).  
783 For post HT-smiFISH immunofluorescence, cells were permeabilized with 0.1% Triton-  
784 X100 in PBS for 10 minutes at room temperature and washed twice with PBS. For cilia  
785 labelling, plates were incubated overnight at 4°C with an anti-Arl13b antibody diluted in  
786 0.1% Triton X-100 PBS. The next day, plates were washed three times with PBS, and  
787 incubated with a Cy5-labeled goat anti-rabbit secondary antibody in 0.1% Triton X-100  
788 PBS. After 2 hour of incubation at room temperature, plates were washed three times with  
789 PBS. To label DNA, cells were then stained with 1 µg/mL Dapi diluted in PBS, and  
790 finally mounted in 90% glycerol (VWR), 1 mg/mL p-Phenylenediamine (Sigma-  
791 Aldrich), PBS pH 8.

792

### 793 **Fluorescence microscopy and image analysis**

794 Images were acquired with an epifluorescence microscope (Nikon ECLIPSE Ti)  
795 equipped with a plan APO VC 60 X objective (N.A 1.4, Nikon), CCD camera (ORCA  
796 Flash 4.0, Hamamatsu) and operated by Micro-Manager (MM studio). Maximum  
797 intensity projection of z-stacks was processed by Fiji. HT-smiFISH-IF were were imaged  
798 on an Opera Phenix High-Content Screening System (PerkinElmer), with a 63x water-  
799 immersion objective (NA 1.15).

800 Centrosomes are detected by poly-glutamylated tubulin and/or FOP staining.  
801 Cilia are detected poly-glutamylated tubulin staining. In multiciliated ependymal cell,  
802 centrioles were chosen at random in multiciliated ependymal cell. P-bodies are identified  
803 by both of DDX6 and EDC4. The number of P-body per cell was determined in images  
804 that are processed by maximum intensity projection from 6 z-stacks acquired at every 1  
805 µm. Fluorescence intensities were measured in 2 µm diameter circles around centrosomes  
806 (RPE1, or mouse NSC) or base of cilia (ependymal cells) were determined by Image J.  
807 Centrosomes and base of cilia that do not overlap the nucleus were selected to exclude  
808 nuclear background interference. The background was defined as the lowest pixel  
809 intensity in the circle and subtracted from the average fluorescence intensity. Pearson's

810 correlation coefficient for colocalization was determined in the selected area by Coloc2  
811 plugin in Fiji. Box plots and bar graphs are made by using matplotlib and GraphPad Prism  
812 7, respectively.

813

814

815

816

817

818

819

820

821

822

823

824

825

826

827

828

829

830

831

832

833

834

835

836 **References**

837

- 838 1 Singh, G., Pratt, G., Yeo, G. W. & Moore, M. J. The Clothes Make the mRNA: Past and  
839 Present Trends in mRNP Fashion. *Annu Rev Biochem* **84**, 325-354, doi:10.1146/annurev-  
840 biochem-080111-092106 (2015).
- 841 2 Kwon, S. C. *et al.* The RNA-binding protein repertoire of embryonic stem cells. *Nat*  
842 *Struct Mol Biol* **20**, 1122-1130, doi:10.1038/nsmb.2638 (2013).
- 843 3 Castello, A. *et al.* Insights into RNA biology from an atlas of mammalian mRNA-binding  
844 proteins. *Cell* **149**, 1393-1406, doi:10.1016/j.cell.2012.04.031 (2012).
- 845 4 Baltz, A. G. *et al.* The mRNA-bound proteome and its global occupancy profile on  
846 protein-coding transcripts. *Mol Cell* **46**, 674-690, doi:10.1016/j.molcel.2012.05.021  
847 (2012).
- 848 5 Gehring, N. H., Wahle, E. & Fischer, U. Deciphering the mRNP Code: RNA-Bound  
849 Determinants of Post-Transcriptional Gene Regulation. *Trends Biochem Sci* **42**, 369-382,  
850 doi:10.1016/j.tibs.2017.02.004 (2017).
- 851 6 Hentze, M. W., Castello, A., Schwarzl, T. & Preiss, T. A brave new world of RNA-binding  
852 proteins. *Nat Rev Mol Cell Biol* **19**, 327-341, doi:10.1038/nrm.2017.130 (2018).
- 853 7 Adivarahan, S. *et al.* Spatial Organization of Single mRNPs at Different Stages of the  
854 Gene Expression Pathway. *Mol Cell* **72**, 727-738 e725, doi:10.1016/j.molcel.2018.10.010  
855 (2018).
- 856 8 Metkar, M. *et al.* Higher-Order Organization Principles of Pre-translational mRNPs. *Mol*  
857 *Cell* **72**, 715-726 e713, doi:10.1016/j.molcel.2018.09.012 (2018).
- 858 9 Sauliere, J. *et al.* CLIP-seq of eIF4AIII reveals transcriptome-wide mapping of the human  
859 exon junction complex. *Nat Struct Mol Biol* **19**, 1124-1131, doi:10.1038/nsmb.2420  
860 (2012).
- 861 10 Singh, G. *et al.* The cellular EJC interactome reveals higher-order mRNP structure and  
862 an EJC-SR protein nexus. *Cell* **151**, 750-764, doi:10.1016/j.cell.2012.10.007 (2012).
- 863 11 Tange, T. O., Shibuya, T., Jurica, M. S. & Moore, M. J. Biochemical analysis of the EJC  
864 reveals two new factors and a stable tetrameric protein core. *RNA* **11**, 1869-1883,  
865 doi:10.1261/rna.2155905 (2005).
- 866 12 Ballut, L. *et al.* The exon junction core complex is locked onto RNA by inhibition of  
867 eIF4AIII ATPase activity. *Nat Struct Mol Biol* **12**, 861-869, doi:10.1038/nsmb990 (2005).
- 868 13 Andersen, C. B. *et al.* Structure of the exon junction core complex with a trapped DEAD-  
869 box ATPase bound to RNA. *Science* **313**, 1968-1972, doi:10.1126/science.1131981  
870 (2006).
- 871 14 Bono, F., Ebert, J., Lorentzen, E. & Conti, E. The crystal structure of the exon junction  
872 complex reveals how it maintains a stable grip on mRNA. *Cell* **126**, 713-725,  
873 doi:10.1016/j.cell.2006.08.006 (2006).
- 874 15 Le Hir, H., Sauliere, J. & Wang, Z. The exon junction complex as a node of post-  
875 transcriptional networks. *Nat Rev Mol Cell Biol* **17**, 41-54, doi:10.1038/nrm.2015.7  
876 (2016).
- 877 16 Gehring, N. H., Lamprinaki, S., Kulozik, A. E. & Hentze, M. W. Disassembly of exon  
878 junction complexes by PYM. *Cell* **137**, 536-548, doi:10.1016/j.cell.2009.02.042 (2009).
- 879 17 Boehm, V. & Gehring, N. H. Exon Junction Complexes: Supervising the Gene Expression  
880 Assembly Line. *Trends Genet* **32**, 724-735, doi:10.1016/j.tig.2016.09.003 (2016).
- 881 18 Nott, A., Le Hir, H. & Moore, M. J. Splicing enhances translation in mammalian cells: an  
882 additional function of the exon junction complex. *Genes Dev* **18**, 210-222,  
883 doi:10.1101/gad.1163204 (2004).
- 884 19 Chazal, P. E. *et al.* EJC core component MLN51 interacts with eIF3 and activates  
885 translation. *Proc Natl Acad Sci U S A* **110**, 5903-5908, doi:10.1073/pnas.1218732110

- 886 (2013).
- 887 20 Kurosaki, T., Popp, M. W. & Maquat, L. E. Quality and quantity control of gene  
888 expression by nonsense-mediated mRNA decay. *Nat Rev Mol Cell Biol* **20**, 406-420,  
889 doi:10.1038/s41580-019-0126-2 (2019).
- 890 21 Wang, T. *et al.* Identification and characterization of essential genes in the human genome.  
891 *Science* **350**, 1096-1101, doi:10.1126/science.aac7041 (2015).
- 892 22 Micklem, D. R. *et al.* The mago nashi gene is required for the polarisation of the oocyte  
893 and the formation of perpendicular axes in *Drosophila*. *Curr Biol* **7**, 468-478,  
894 doi:10.1016/s0960-9822(06)00218-1 (1997).
- 895 23 Newmark, P. A., Mohr, S. E., Gong, L. & Boswell, R. E. mago nashi mediates the  
896 posterior follicle cell-to-oocyte signal to organize axis formation in *Drosophila*.  
897 *Development* **124**, 3197-3207 (1997).
- 898 24 Kawano, T., Kataoka, N., Dreyfuss, G. & Sakamoto, H. Ce-Y14 and MAG-1, components  
899 of the exon-exon junction complex, are required for embryogenesis and germline sexual  
900 switching in *Caenorhabditis elegans*. *Mech Dev* **121**, 27-35,  
901 doi:10.1016/j.mod.2003.11.003 (2004).
- 902 25 van der Weele, C. M., Tsai, C. W. & Wolniak, S. M. Mago nashi is essential for  
903 spermatogenesis in *Marsilea*. *Mol Biol Cell* **18**, 3711-3722, doi:10.1091/mbc.e06-11-  
904 0979 (2007).
- 905 26 Wittkopp, N. *et al.* Nonsense-mediated mRNA decay effectors are essential for zebrafish  
906 embryonic development and survival. *Mol Cell Biol* **29**, 3517-3528,  
907 doi:10.1128/MCB.00177-09 (2009).
- 908 27 Haremake, T., Sridharan, J., Dvora, S. & Weinstein, D. C. Regulation of vertebrate  
909 embryogenesis by the exon junction complex core component Eif4a3. *Dev Dyn* **239**,  
910 1977-1987, doi:10.1002/dvdy.22330 (2010).
- 911 28 Pascuan, C., Frare, R., Alleva, K., Ayub, N. D. & Soto, G. mRNA biogenesis-related  
912 helicase eIF4AIII from *Arabidopsis thaliana* is an important factor for abiotic stress  
913 adaptation. *Plant Cell Rep* **35**, 1205-1208, doi:10.1007/s00299-016-1947-5 (2016).
- 914 29 McMahan, J. J., Miller, E. E. & Silver, D. L. The exon junction complex in neural  
915 development and neurodevelopmental disease. *Int J Dev Neurosci* **55**, 117-123,  
916 doi:10.1016/j.ijdevneu.2016.03.006 (2016).
- 917 30 Albers, C. A. *et al.* Compound inheritance of a low-frequency regulatory SNP and a rare  
918 null mutation in exon-junction complex subunit RBM8A causes TAR syndrome. *Nat*  
919 *Genet* **44**, 435-439, S431-432, doi:10.1038/ng.1083 (2012).
- 920 31 Favaro, F. P. *et al.* A noncoding expansion in EIF4A3 causes Richieri-Costa-Pereira  
921 syndrome, a craniofacial disorder associated with limb defects. *Am J Hum Genet* **94**, 120-  
922 128, doi:10.1016/j.ajhg.2013.11.020 (2014).
- 923 32 Nguyen, L. S. *et al.* Contribution of copy number variants involving nonsense-mediated  
924 mRNA decay pathway genes to neuro-developmental disorders. *Hum Mol Genet* **22**,  
925 1816-1825, doi:10.1093/hmg/ddt035 (2013).
- 926 33 Silver, D. L. *et al.* The exon junction complex component Magoh controls brain size by  
927 regulating neural stem cell division. *Nat Neurosci* **13**, 551-558, doi:10.1038/nn.2527  
928 (2010).
- 929 34 McMahan, J. J., Shi, L. & Silver, D. L. Generation of a Magoh conditional allele in mice.  
930 *Genesis* **52**, 752-758, doi:10.1002/dvg.22788 (2014).
- 931 35 Pilaz, L. J. *et al.* Prolonged Mitosis of Neural Progenitors Alters Cell Fate in the  
932 Developing Brain. *Neuron* **89**, 83-99, doi:10.1016/j.neuron.2015.12.007 (2016).
- 933 36 Mao, H. *et al.* Rbm8a haploinsufficiency disrupts embryonic cortical development  
934 resulting in microcephaly. *J Neurosci* **35**, 7003-7018, doi:10.1523/JNEUROSCI.0018-  
935 15.2015 (2015).
- 936 37 Mao, H., McMahan, J. J., Tsai, Y. H., Wang, Z. & Silver, D. L. Haploinsufficiency for

- 937 Core Exon Junction Complex Components Disrupts Embryonic Neurogenesis and  
938 Causes p53-Mediated Microcephaly. *PLoS Genet* **12**, e1006282,  
939 doi:10.1371/journal.pgen.1006282 (2016).
- 940 38 Mao, H., Brown, H. E. & Silver, D. L. Mouse models of Casc3 reveal developmental  
941 functions distinct from other components of the exon junction complex. *RNA* **23**, 23-31,  
942 doi:10.1261/rna.058826.116 (2017).
- 943 39 Jolly, L. A., Homan, C. C., Jacob, R., Barry, S. & Gecz, J. The UPF3B gene, implicated  
944 in intellectual disability, autism, ADHD and childhood onset schizophrenia regulates  
945 neural progenitor cell behaviour and neuronal outgrowth. *Hum Mol Genet* **22**, 4673-4687,  
946 doi:10.1093/hmg/ddt315 (2013).
- 947 40 Alrahbeni, T. *et al.* Full UPF3B function is critical for neuronal differentiation of neural  
948 stem cells. *Mol Brain* **8**, 33, doi:10.1186/s13041-015-0122-1 (2015).
- 949 41 Lou, C. H. *et al.* Posttranscriptional control of the stem cell and neurogenic programs by  
950 the nonsense-mediated RNA decay pathway. *Cell Rep* **6**, 748-764,  
951 doi:10.1016/j.celrep.2014.01.028 (2014).
- 952 42 Conduit, P. T., Wainman, A. & Raff, J. W. Centrosome function and assembly in animal  
953 cells. *Nat Rev Mol Cell Biol* **16**, 611-624, doi:10.1038/nrm4062 (2015).
- 954 43 Delgehyr, N. *et al.* Ependymal cell differentiation, from monociliated to multiciliated  
955 cells. *Methods Cell Biol* **127**, 19-35, doi:10.1016/bs.mcb.2015.01.004 (2015).
- 956 44 Spassky, N. *et al.* Adult ependymal cells are postmitotic and are derived from radial glial  
957 cells during embryogenesis. *J Neurosci* **25**, 10-18, doi:10.1523/JNEUROSCI.1108-  
958 04.2005 (2005).
- 959 45 Spassky, N. & Meunier, A. The development and functions of multiciliated epithelia. *Nat*  
960 *Rev Mol Cell Biol* **18**, 423-436, doi:10.1038/nrm.2017.21 (2017).
- 961 46 Acquaviva, C. *et al.* The centrosomal FOP protein is required for cell cycle progression  
962 and survival. *Cell Cycle* **8**, 1217-1227, doi:10.4161/cc.8.8.8248 (2009).
- 963 47 Stearns, T. & Winey, M. The cell center at 100. *Cell* **91**, 303-309, doi:10.1016/s0092-  
964 8674(00)80414-6 (1997).
- 965 48 Bobinnec, Y. *et al.* Centriole disassembly in vivo and its effect on centrosome structure  
966 and function in vertebrate cells. *J Cell Biol* **143**, 1575-1589, doi:10.1083/jcb.143.6.1575  
967 (1998).
- 968 49 Palacios, I. M., Gatfield, D., St Johnston, D. & Izaurralde, E. An eIF4AIII-containing  
969 complex required for mRNA localization and nonsense-mediated mRNA decay. *Nature*  
970 **427**, 753-757, doi:10.1038/nature02351 (2004).
- 971 50 Kataoka, N. *et al.* Pre-mRNA splicing imprints mRNA in the nucleus with a novel RNA-  
972 binding protein that persists in the cytoplasm. *Mol Cell* **6**, 673-682, doi:10.1016/s1097-  
973 2765(00)00065-4 (2000).
- 974 51 Daguinet, E. *et al.* Perispeckles are major assembly sites for the exon junction core  
975 complex. *Mol Biol Cell* **23**, 1765-1782, doi:10.1091/mbc.E12-01-0040 (2012).
- 976 52 Molla-Herman, A. *et al.* The ciliary pocket: an endocytic membrane domain at the base  
977 of primary and motile cilia. *J Cell Sci* **123**, 1785-1795, doi:10.1242/jcs.059519 (2010).
- 978 53 Ghossoub, R. *et al.* Septins 2, 7 and 9 and MAP4 colocalize along the axoneme in the  
979 primary cilium and control ciliary length. *J Cell Sci* **126**, 2583-2594,  
980 doi:10.1242/jcs.111377 (2013).
- 981 54 Fribourg, S., Gatfield, D., Izaurralde, E. & Conti, E. A novel mode of RBD-protein  
982 recognition in the Y14-Mago complex. *Nat Struct Biol* **10**, 433-439, doi:10.1038/nsb926  
983 (2003).
- 984 55 Gong, P., Zhao, M. & He, C. Slow co-evolution of the MAGO and Y14 protein families  
985 is required for the maintenance of their obligate heterodimerization mode. *PLoS One* **9**,  
986 e84842, doi:10.1371/journal.pone.0084842 (2014).
- 987 56 Degot, S. *et al.* Association of the breast cancer protein MLN51 with the exon junction

- 988 complex via its speckle localizer and RNA binding module. *J Biol Chem* **279**, 33702-  
989 33715, doi:10.1074/jbc.M402754200 (2004).
- 990 57 Spalluto, C., Wilson, D. I. & Hearn, T. Evidence for reciliation of RPE1 cells in late G1  
991 phase, and ciliary localisation of cyclin B1. *FEBS Open Bio* **3**, 334-340,  
992 doi:10.1016/j.fob.2013.08.002 (2013).
- 993 58 Eisinger-Mathason, T. S. *et al.* Codependent functions of RSK2 and the apoptosis-  
994 promoting factor TIA-1 in stress granule assembly and cell survival. *Mol Cell* **31**, 722-  
995 736, doi:10.1016/j.molcel.2008.06.025 (2008).
- 996 59 Dowling, R. J. *et al.* mTORC1-mediated cell proliferation, but not cell growth, controlled  
997 by the 4E-BPs. *Science* **328**, 1172-1176, doi:10.1126/science.1187532 (2010).
- 998 60 Vander Haar, E., Lee, S. I., Bandhakavi, S., Griffin, T. J. & Kim, D. H. Insulin signalling  
999 to mTOR mediated by the Akt/PKB substrate PRAS40. *Nat Cell Biol* **9**, 316-323,  
1000 doi:10.1038/ncb1547 (2007).
- 1001 61 Bilanges, B. *et al.* Tuberous sclerosis complex proteins 1 and 2 control serum-dependent  
1002 translation in a TOP-dependent and -independent manner. *Mol Cell Biol* **27**, 5746-5764,  
1003 doi:10.1128/MCB.02136-06 (2007).
- 1004 62 Standart, N. & Weil, D. P-Bodies: Cytosolic Droplets for Coordinated mRNA Storage.  
1005 *Trends Genet* **34**, 612-626, doi:10.1016/j.tig.2018.05.005 (2018).
- 1006 63 Martin, K. C. & Ephrussi, A. mRNA localization: gene expression in the spatial  
1007 dimension. *Cell* **136**, 719-730, doi:10.1016/j.cell.2009.01.044 (2009).
- 1008 64 Chin, A. & Lecuyer, E. RNA localization: Making its way to the center stage. *Biochim*  
1009 *Biophys Acta Gen Subj* **1861**, 2956-2970, doi:10.1016/j.bbagen.2017.06.011 (2017).
- 1010 65 Ryder, P. V. & Lerit, D. A. RNA localization regulates diverse and dynamic cellular  
1011 processes. *Traffic* **19**, 496-502, doi:10.1111/tra.12571 (2018).
- 1012 66 Panic, M., Hata, S., Neuner, A. & Schiebel, E. The centrosomal linker and microtubules  
1013 provide dual levels of spatial coordination of centrosomes. *PLoS Genet* **11**, e1005243,  
1014 doi:10.1371/journal.pgen.1005243 (2015).
- 1015 67 Safieddine, A. *et al.* A conserved choreography of mRNAs at centrosomes reveals a  
1016 localization mechanism involving active polysome transport. *bioRxiv*,  
1017 2020.2009.2004.282038, doi:10.1101/2020.09.04.282038 (2020).
- 1018 68 Tsanov, N. *et al.* smiFISH and FISH-quant - a flexible single RNA detection approach  
1019 with super-resolution capability. *Nucleic Acids Res* **44**, e165, doi:10.1093/nar/gkw784  
1020 (2016).
- 1021 69 Hoffmeister, H. *et al.* CHD3 and CHD4 form distinct NuRD complexes with different yet  
1022 overlapping functionality. *Nucleic Acids Res* **45**, 10534-10554, doi:10.1093/nar/gkx711  
1023 (2017).
- 1024 70 Bertran, M. T. *et al.* Nek9 is a Plk1-activated kinase that controls early centrosome  
1025 separation through Nek6/7 and Eg5. *EMBO J* **30**, 2634-2647,  
1026 doi:10.1038/emboj.2011.179 (2011).
- 1027 71 Olenick, M. A. & Holzbaur, E. L. F. Dynein activators and adaptors at a glance. *J Cell*  
1028 *Sci* **132**, doi:10.1242/jcs.227132 (2019).
- 1029 72 Delgehyr, N., Sillibourne, J. & Bornens, M. Microtubule nucleation and anchoring at the  
1030 centrosome are independent processes linked by ninein function. *J Cell Sci* **118**, 1565-  
1031 1575, doi:10.1242/jcs.02302 (2005).
- 1032 73 Mazo, G., Soplop, N., Wang, W. J., Uryu, K. & Tsou, M. F. Spatial Control of Primary  
1033 Ciliogenesis by Subdistal Appendages Alters Sensation-Associated Properties of Cilia.  
1034 *Dev Cell* **39**, 424-437, doi:10.1016/j.devcel.2016.10.006 (2016).
- 1035 74 Sepulveda, G. *et al.* Co-translational protein targeting facilitates centrosomal recruitment  
1036 of PCNT during centrosome maturation in vertebrates. *Elife* **7**, doi:10.7554/eLife.34959  
1037 (2018).
- 1038 75 Chouaib, R. *et al.* A Dual Protein-mRNA Localization Screen Reveals



- 1039           Compartmentalized Translation and Widespread Co-translational RNA Targeting. *Dev*  
1040           *Cell*, doi:10.1016/j.devcel.2020.07.010 (2020).
- 1041    76    Mabin, J. W. *et al.* The Exon Junction Complex Undergoes a Compositional Switch that  
1042           Alters mRNP Structure and Nonsense-Mediated mRNA Decay Activity. *Cell Rep* **25**,  
1043           2431-2446 e2437, doi:10.1016/j.celrep.2018.11.046 (2018).
- 1044    77    Dammermann, A. & Merdes, A. Assembly of centrosomal proteins and microtubule  
1045           organization depends on PCM-1. *J Cell Biol* **159**, 255-266, doi:10.1083/jcb.200204023  
1046           (2002).
- 1047    78    Hartman, H., Puma, J. P. & Gruney, T., Jr. Evidence for the association of RNA with the  
1048           ciliary basal bodies of Tetrahymena. *J Cell Sci* **16**, 241-259 (1974).
- 1049    79    Dippell, R. V. Effects of nuclease and protease digestion on the ultrastructure of  
1050           Paramecium basal bodies. *J Cell Biol* **69**, 622-637, doi:10.1083/jcb.69.3.622 (1976).
- 1051    80    Lambert, J. D. & Nagy, L. M. Asymmetric inheritance of centrosomally localized mRNAs  
1052           during embryonic cleavages. *Nature* **420**, 682-686, doi:10.1038/nature01241 (2002).
- 1053    81    Groisman, I. *et al.* CPEB, maskin, and cyclin B1 mRNA at the mitotic apparatus:  
1054           implications for local translational control of cell division. *Cell* **103**, 435-447,  
1055           doi:10.1016/s0092-8674(00)00135-5 (2000).
- 1056    82    Buxbaum, A. R., Haimovich, G. & Singer, R. H. In the right place at the right time:  
1057           visualizing and understanding mRNA localization. *Nat Rev Mol Cell Biol* **16**, 95-109,  
1058           doi:10.1038/nrm3918 (2015).
- 1059    83    Pichon, X. *et al.* Visualization of single endogenous polysomes reveals the dynamics of  
1060           translation in live human cells. *J Cell Biol* **214**, 769-781, doi:10.1083/jcb.201605024  
1061           (2016).
- 1062    84    Wu, B., Eliscovich, C., Yoon, Y. J. & Singer, R. H. Translation dynamics of single  
1063           mRNAs in live cells and neurons. *Science* **352**, 1430-1435, doi:10.1126/science.aaf1084  
1064           (2016).
- 1065    85    Cui, X. A. & Palazzo, A. F. Localization of mRNAs to the endoplasmic reticulum. *Wiley*  
1066           *Interdiscip Rev RNA* **5**, 481-492, doi:10.1002/wrna.1225 (2014).
- 1067    86    Redwine, W. B. *et al.* The human cytoplasmic dynein interactome reveals novel activators  
1068           of motility. *Elife* **6**, doi:10.7554/eLife.28257 (2017).
- 1069    87    Ghosh, S., Marchand, V., Gaspar, I. & Ephrussi, A. Control of RNP motility and  
1070           localization by a splicing-dependent structure in oskar mRNA. *Nat Struct Mol Biol* **19**,  
1071           441-449, doi:10.1038/nsmb.2257 (2012).
- 1072    88    Kugler, J. M. & Lasko, P. Localization, anchoring and translational control of oskar,  
1073           gurken, bicoid and nanos mRNA during Drosophila oogenesis. *Fly (Austin)* **3**, 15-28,  
1074           doi:10.4161/fly.3.1.7751 (2009).
- 1075    89    Breslow, D. K. & Holland, A. J. Mechanism and Regulation of Centriole and Cilium  
1076           Biogenesis. *Annu Rev Biochem* **88**, 691-724, doi:10.1146/annurev-biochem-013118-  
1077           111153 (2019).
- 1078    90    Malicki, J. J. & Johnson, C. A. The Cilium: Cellular Antenna and Central Processing Unit.  
1079           *Trends Cell Biol* **27**, 126-140, doi:10.1016/j.tcb.2016.08.002 (2017).
- 1080    91    Hori, A. & Toda, T. Regulation of centriolar satellite integrity and its physiology. *Cell*  
1081           *Mol Life Sci* **74**, 213-229, doi:10.1007/s00018-016-2315-x (2017).
- 1082    92    Odabasi, E., Gul, S., Kavakli, I. H. & Firat-Karalar, E. N. Centriolar satellites are required  
1083           for efficient ciliogenesis and ciliary content regulation. *EMBO Rep* **20**,  
1084           doi:10.15252/embr.201947723 (2019).
- 1085    93    Saade, M., Blanco-Ameijeiras, J., Gonzalez-Gobartt, E. & Marti, E. A centrosomal view  
1086           of CNS growth. *Development* **145**, doi:10.1242/dev.170613 (2018).
- 1087    94    Jayaraman, D., Bae, B. I. & Walsh, C. A. The Genetics of Primary Microcephaly. *Annu*  
1088           *Rev Genomics Hum Genet* **19**, 177-200, doi:10.1146/annurev-genom-083117-021441  
1089           (2018).

- 1090 95 Wang, X. *et al.* Asymmetric centrosome inheritance maintains neural progenitors in the  
1091 neocortex. *Nature* **461**, 947-955, doi:10.1038/nature08435 (2009).
- 1092 96 Jeong, A. L. *et al.* Oncoprotein CIP2A promotes the disassembly of primary cilia and  
1093 inhibits glycolytic metabolism. *EMBO Rep* **19**, doi:10.15252/embr.201745144 (2018).
- 1094 97 Barbosa, I. *et al.* Human CWC22 escorts the helicase eIF4AIII to spliceosomes and  
1095 promotes exon junction complex assembly. *Nat Struct Mol Biol* **19**, 983-990,  
1096 doi:10.1038/nsmb.2380 (2012).
- 1097 98 Cavaloc, Y., Bourgeois, C. F., Kister, L. & Stevenin, J. The splicing factors 9G8 and  
1098 SRp20 transactivate splicing through different and specific enhancers. *RNA* **5**, 468-483,  
1099 doi:10.1017/s1355838299981967 (1999).

1100

1101

1102

1103

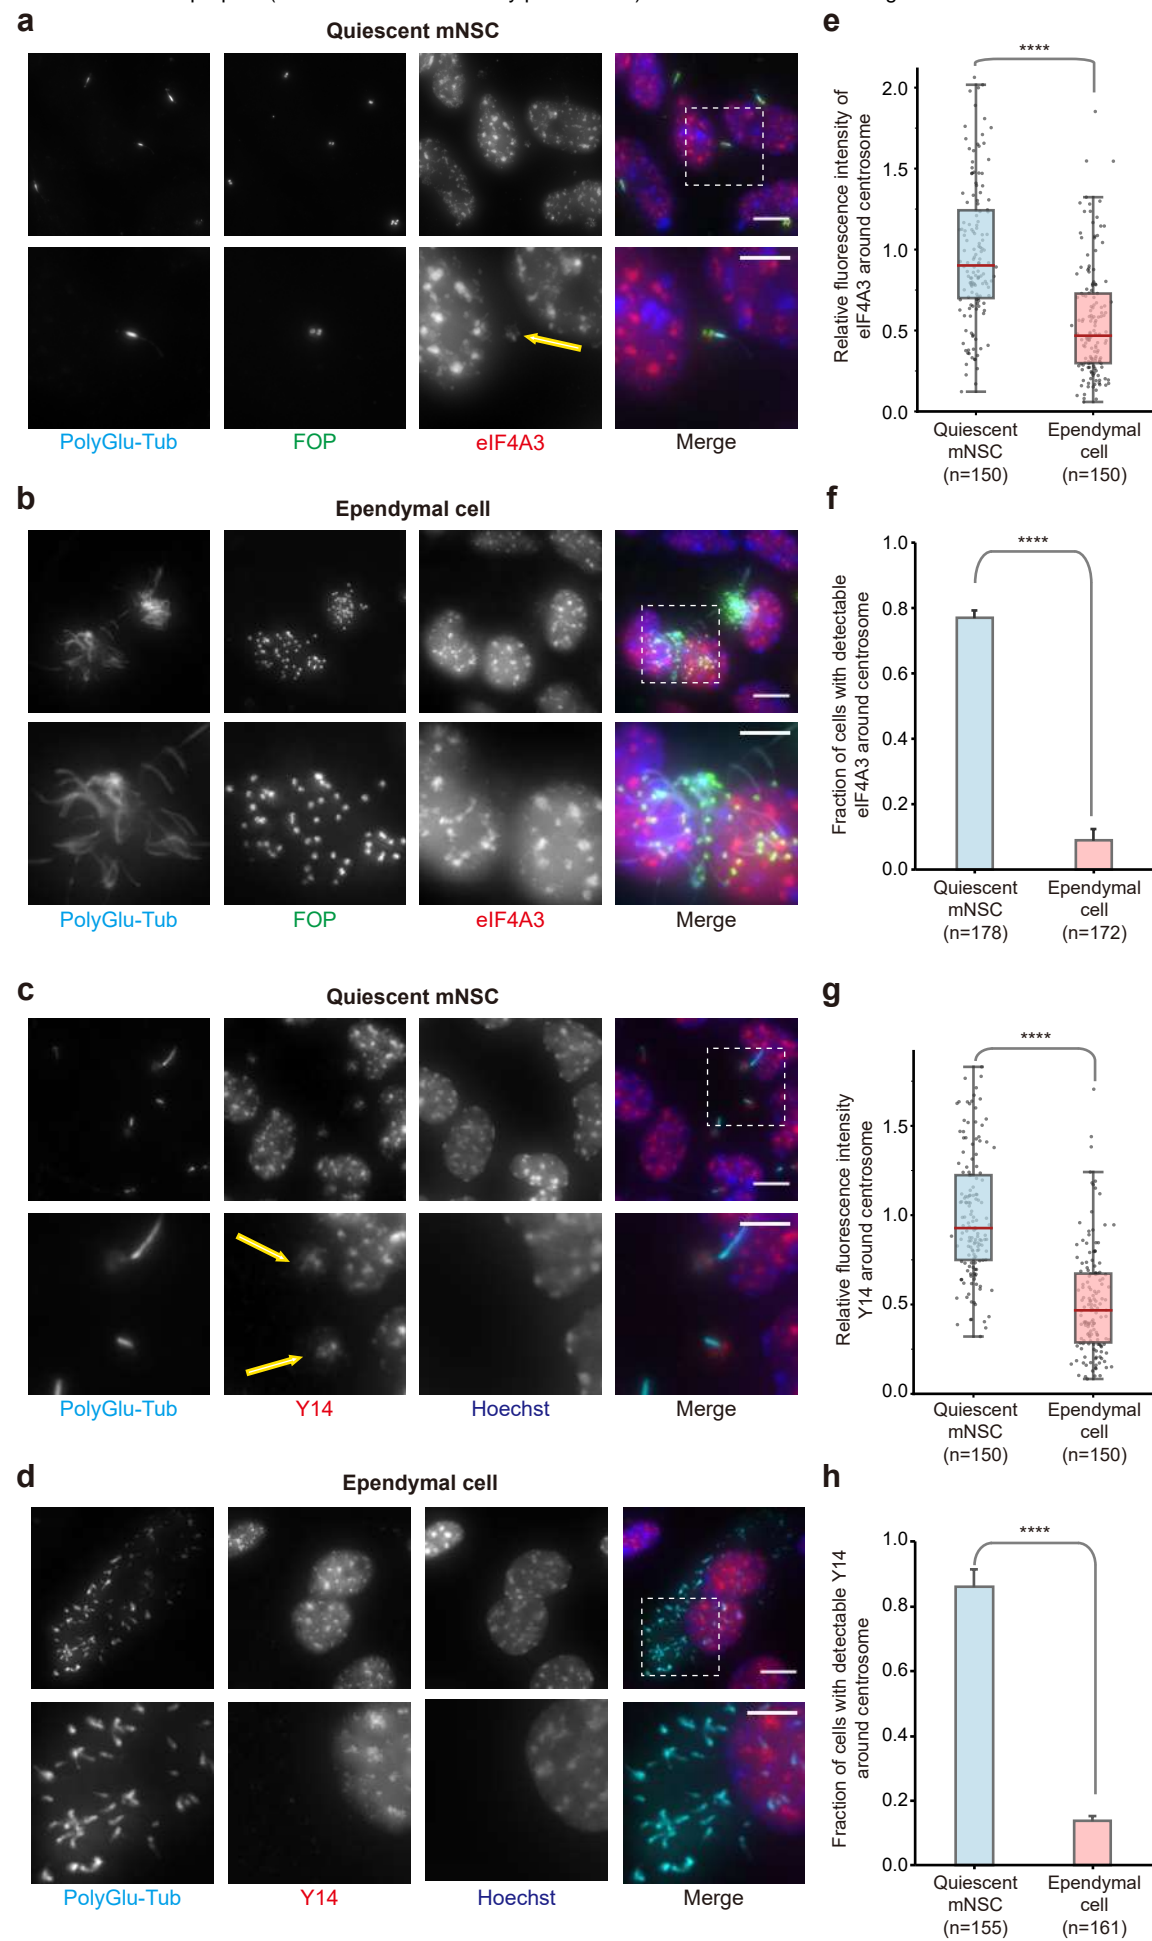

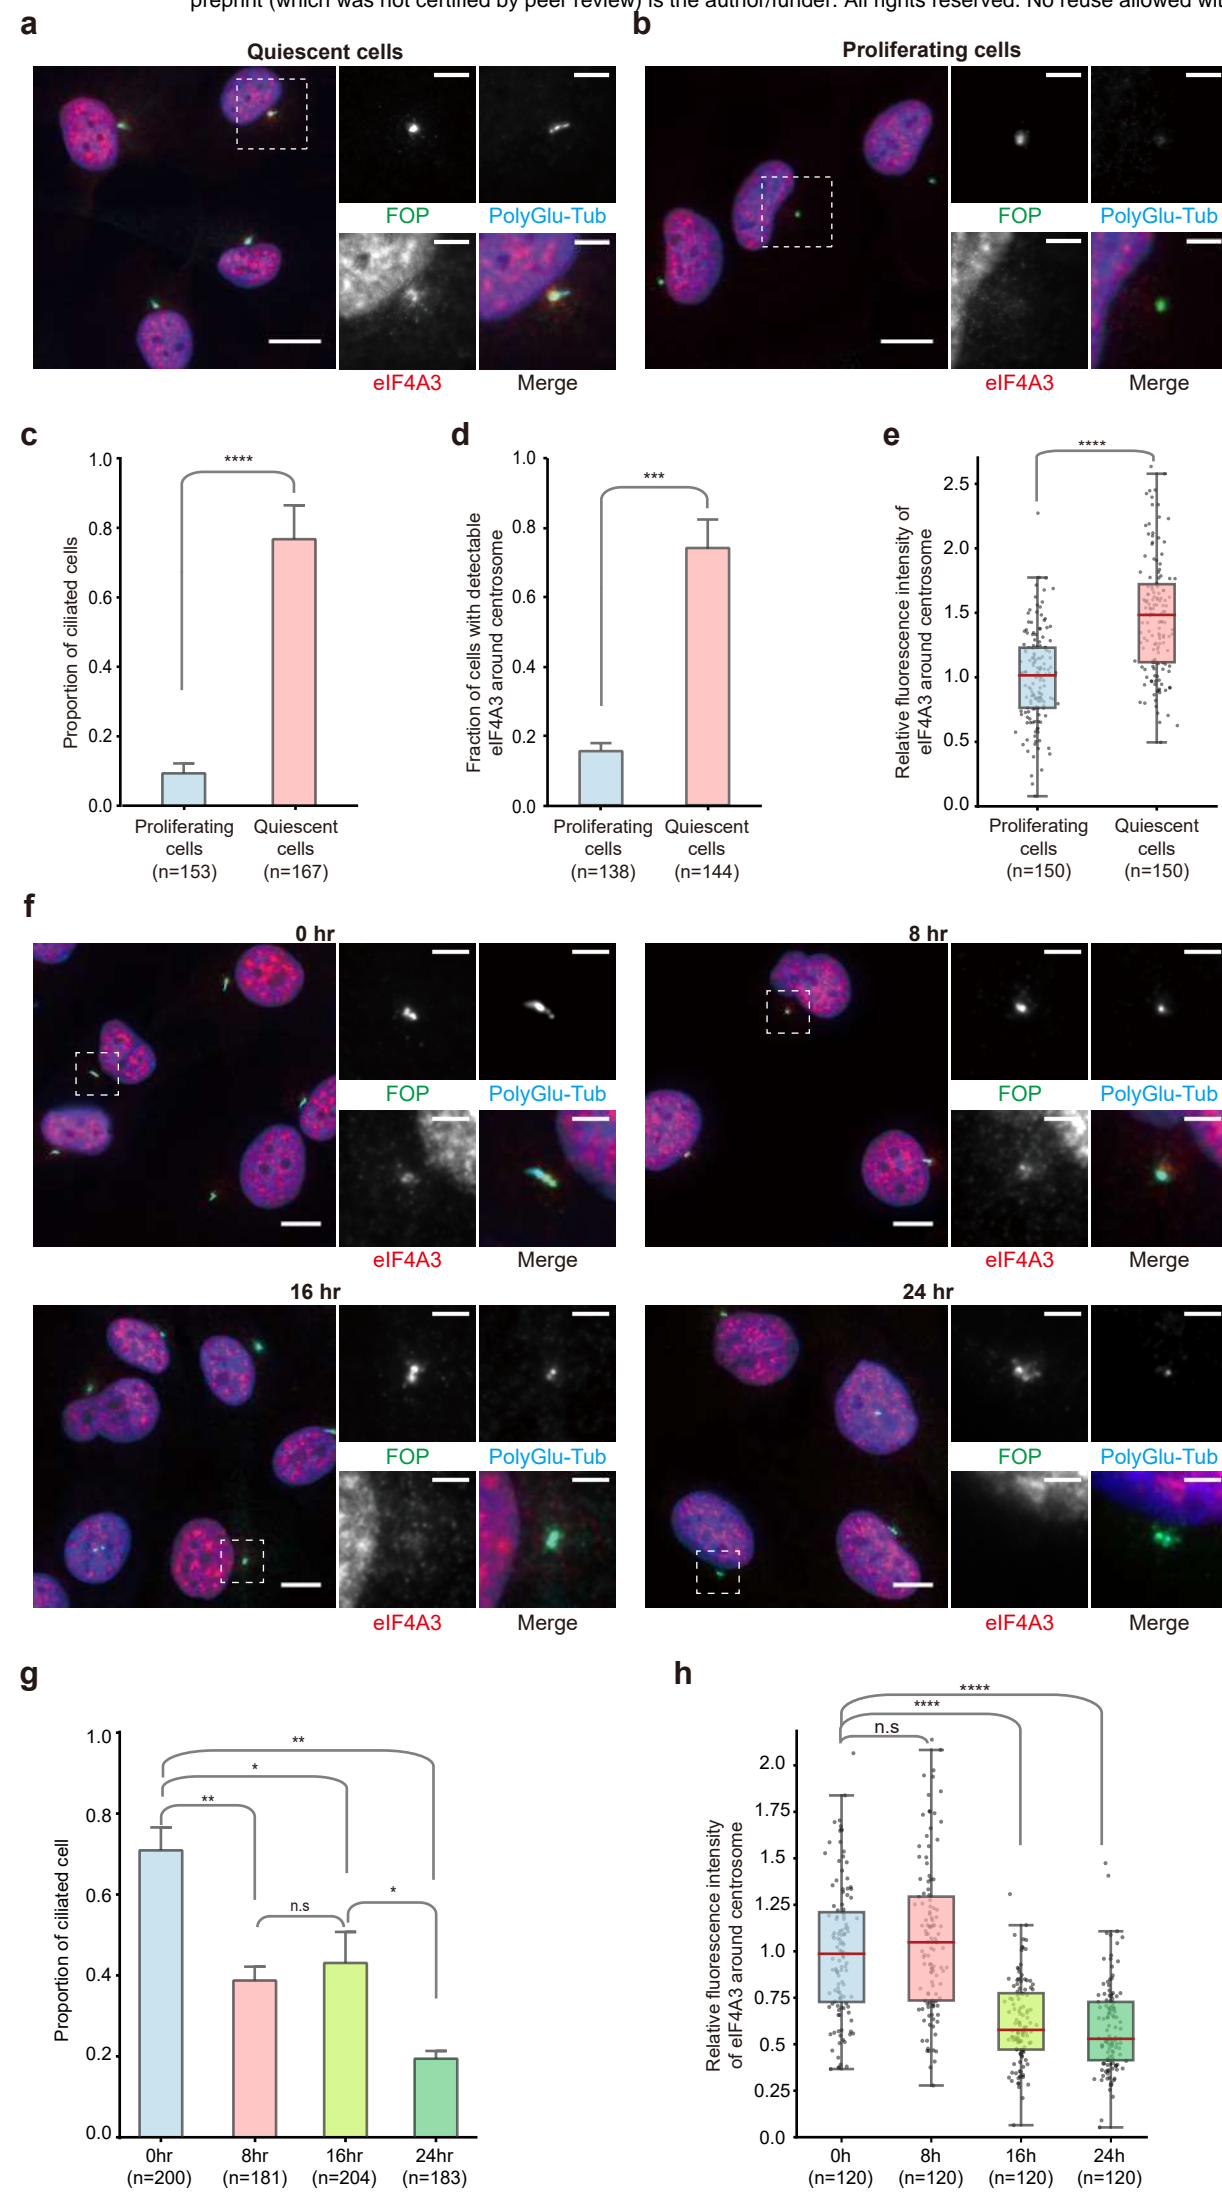

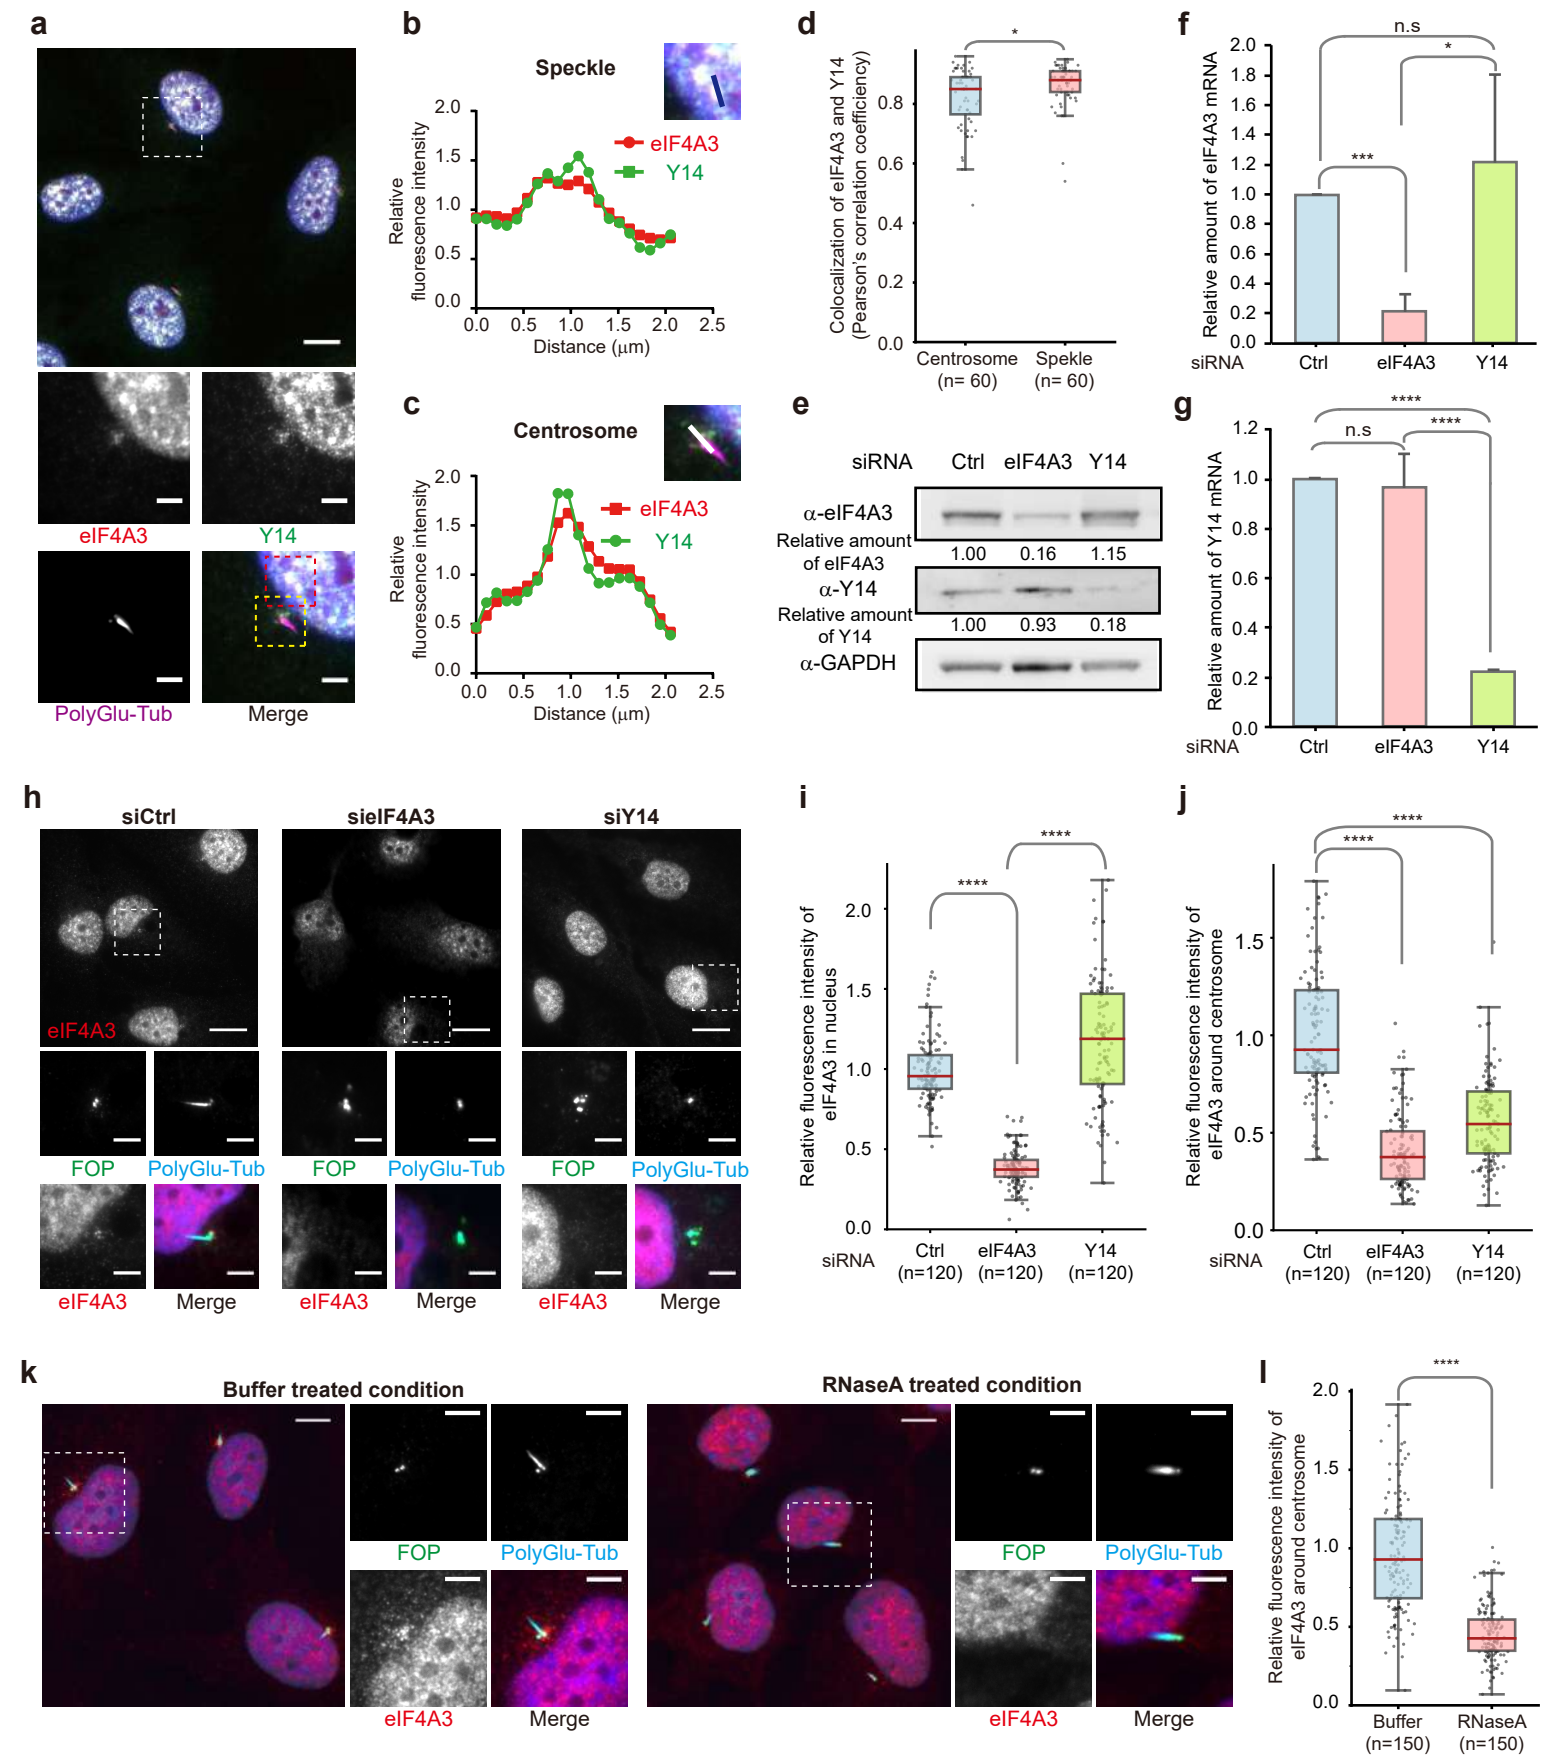

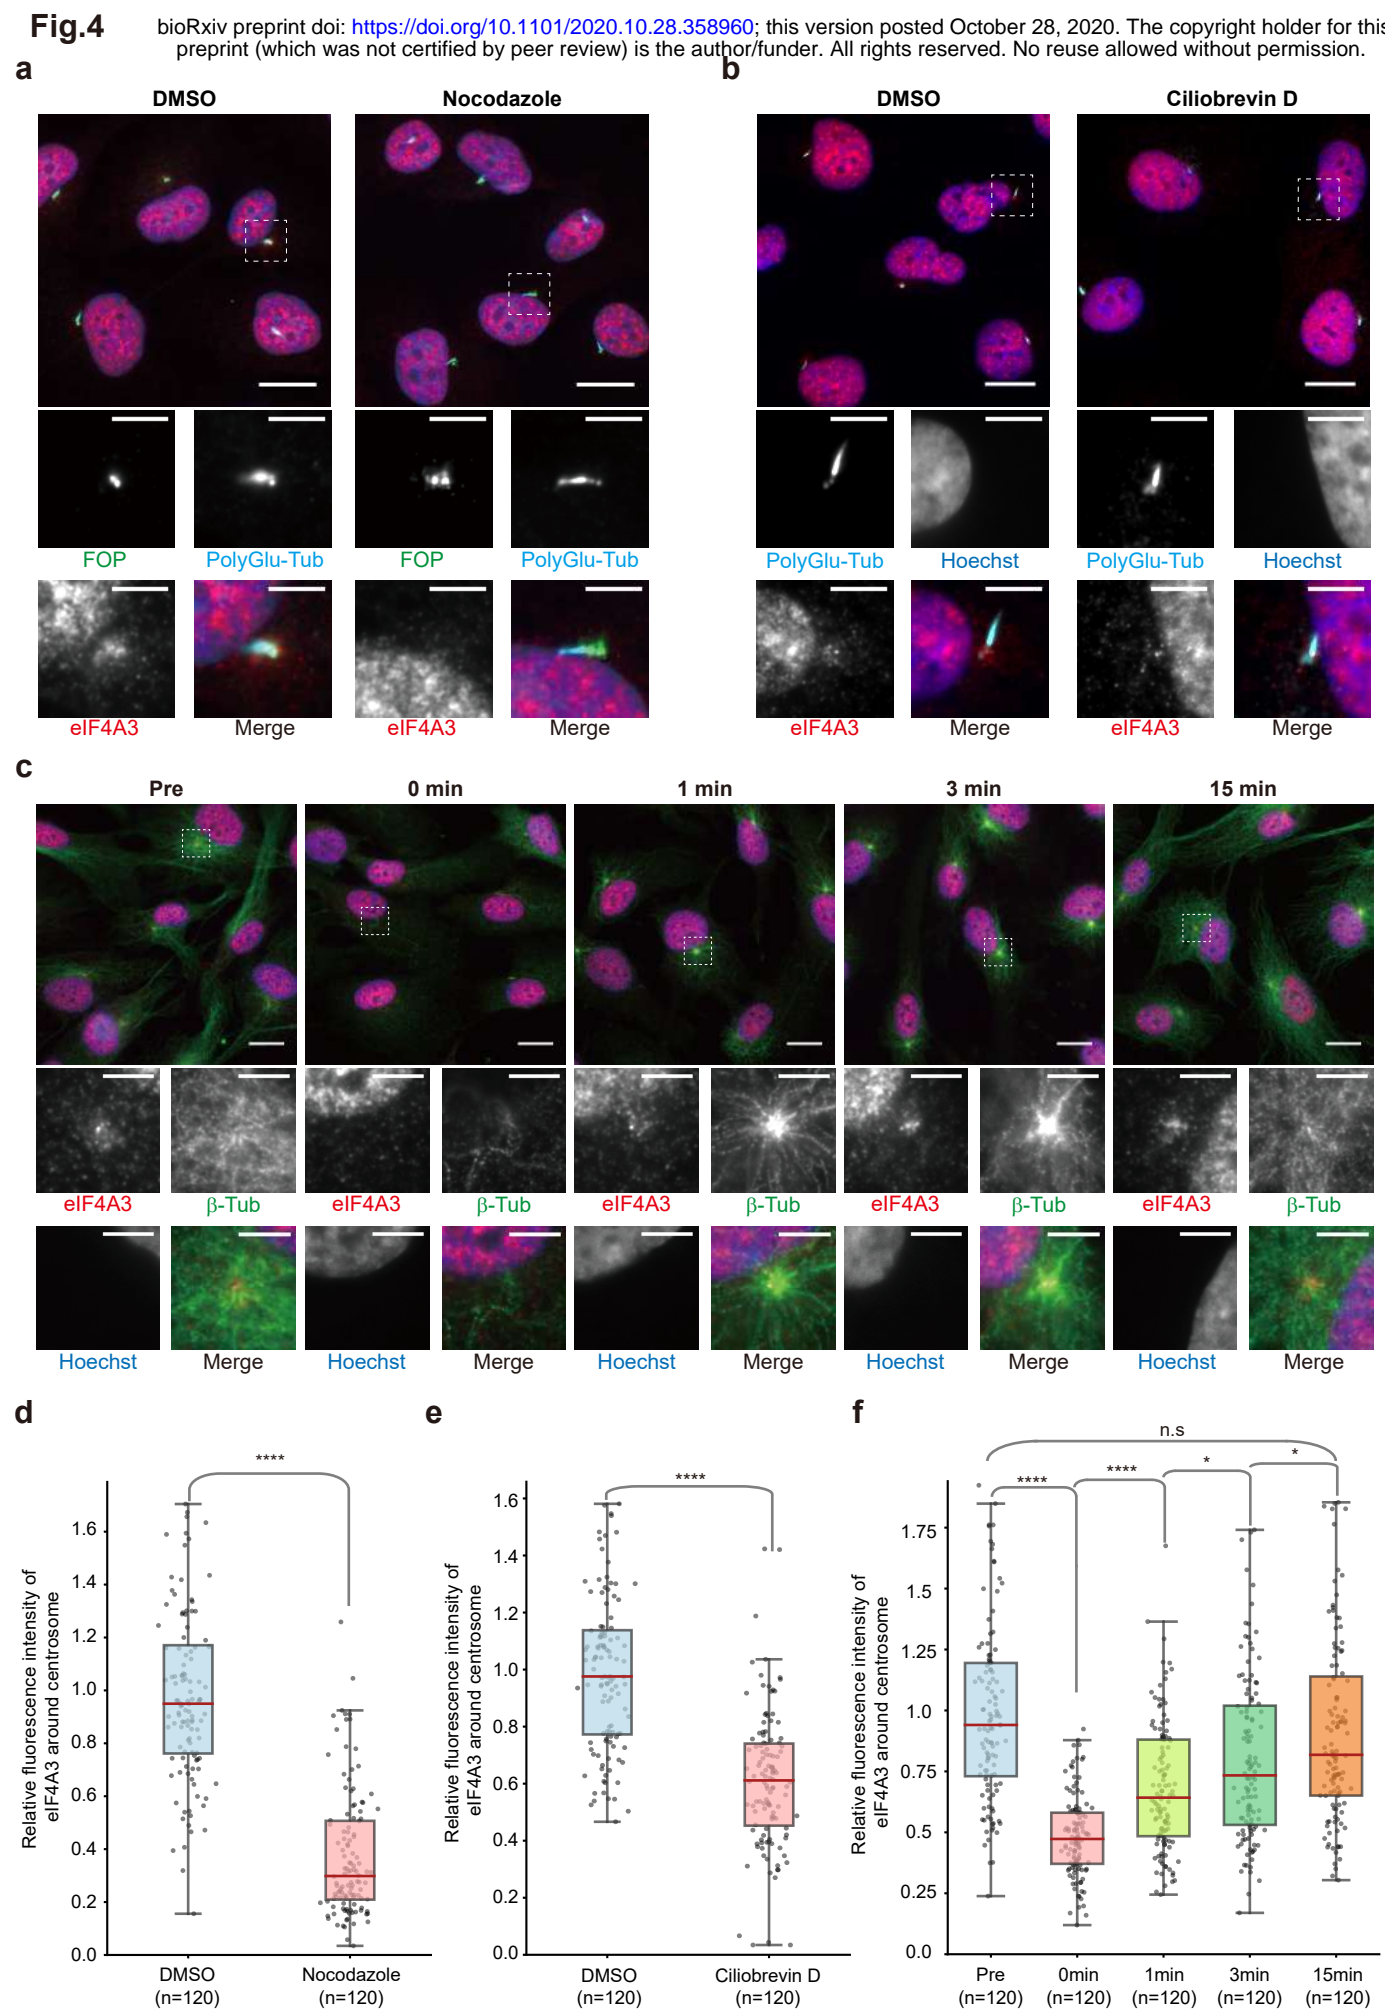

**a**

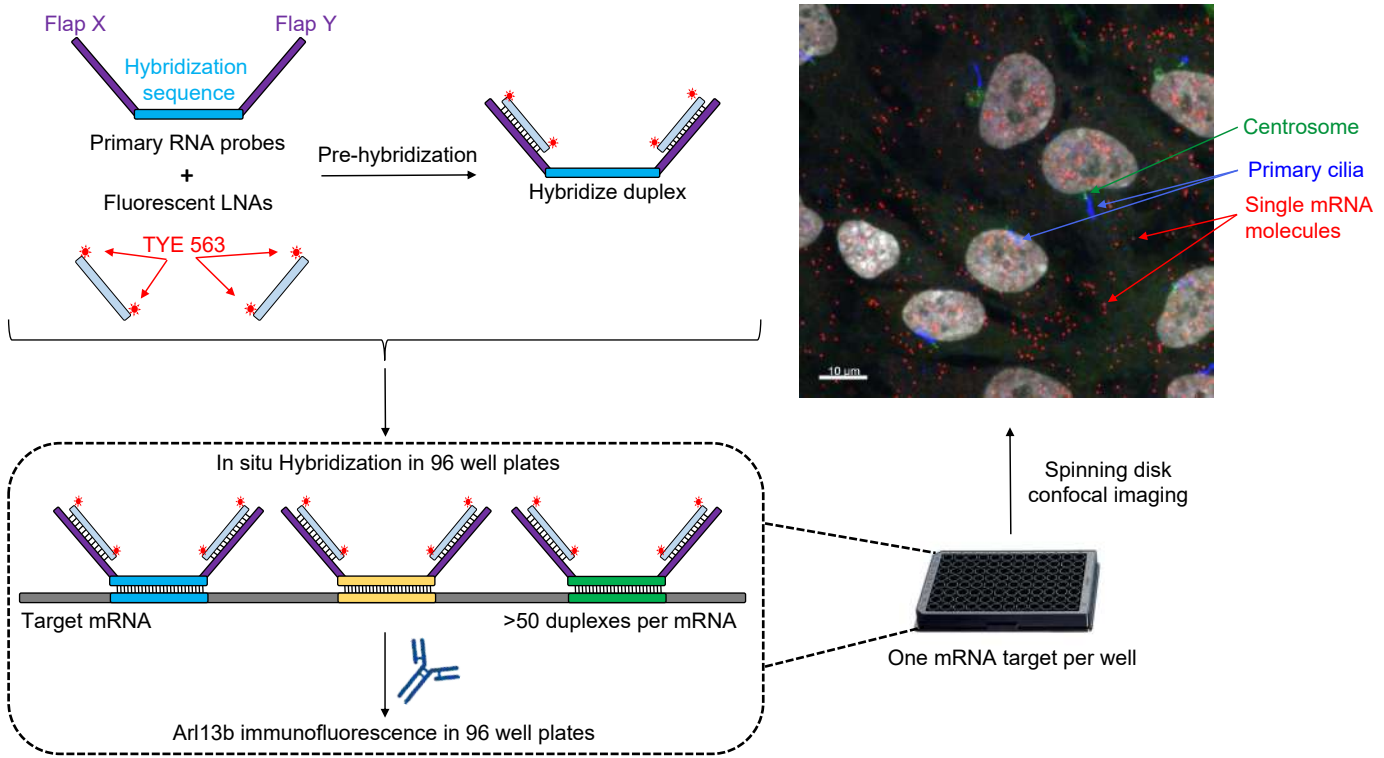

**b**

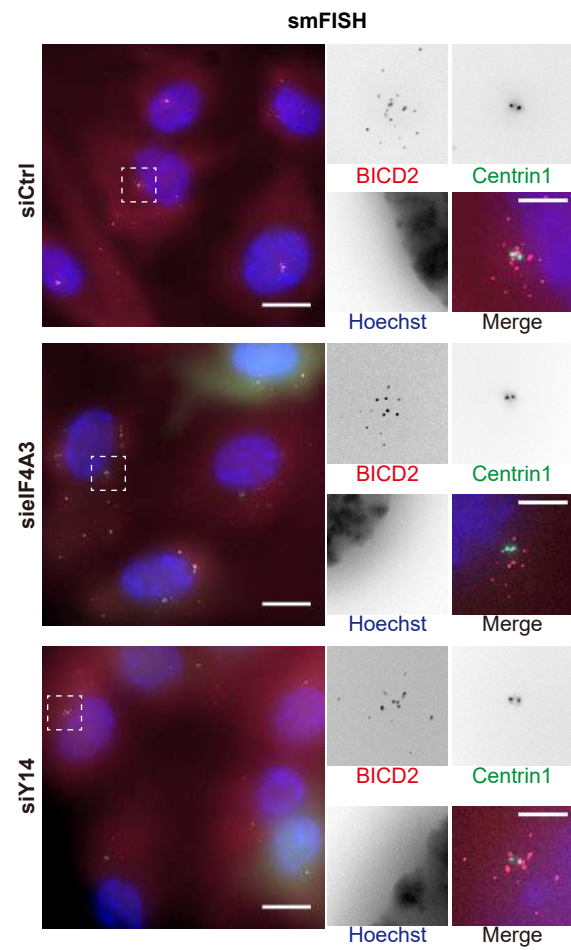

**c**

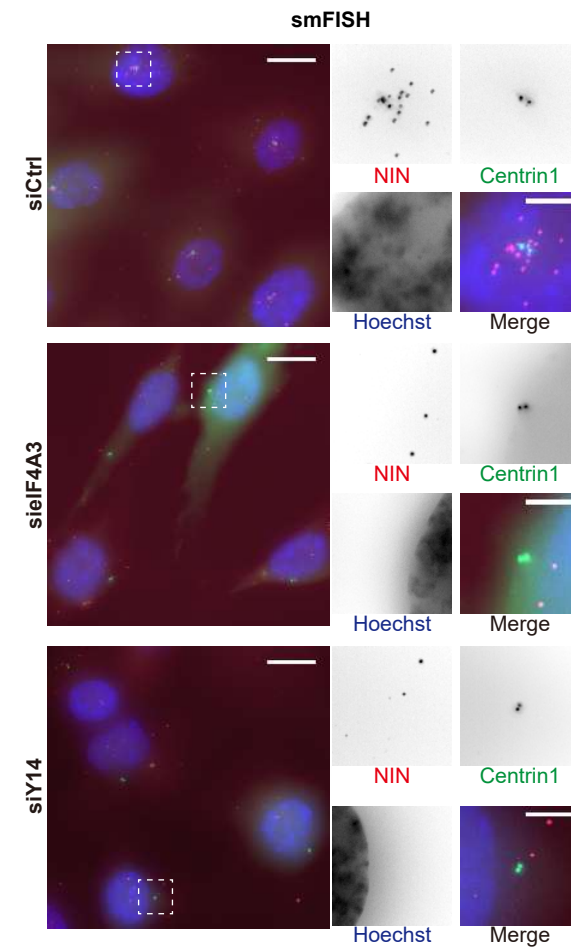

**d**

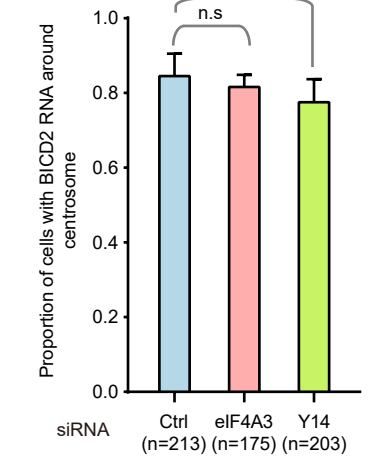

**e**

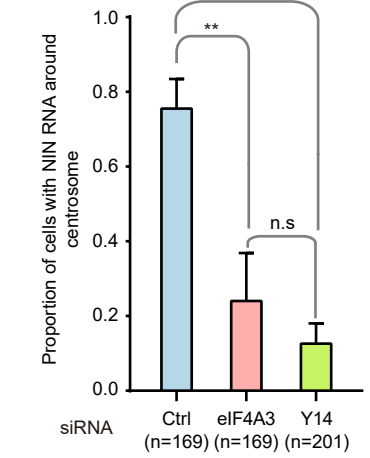

**Fig.6**

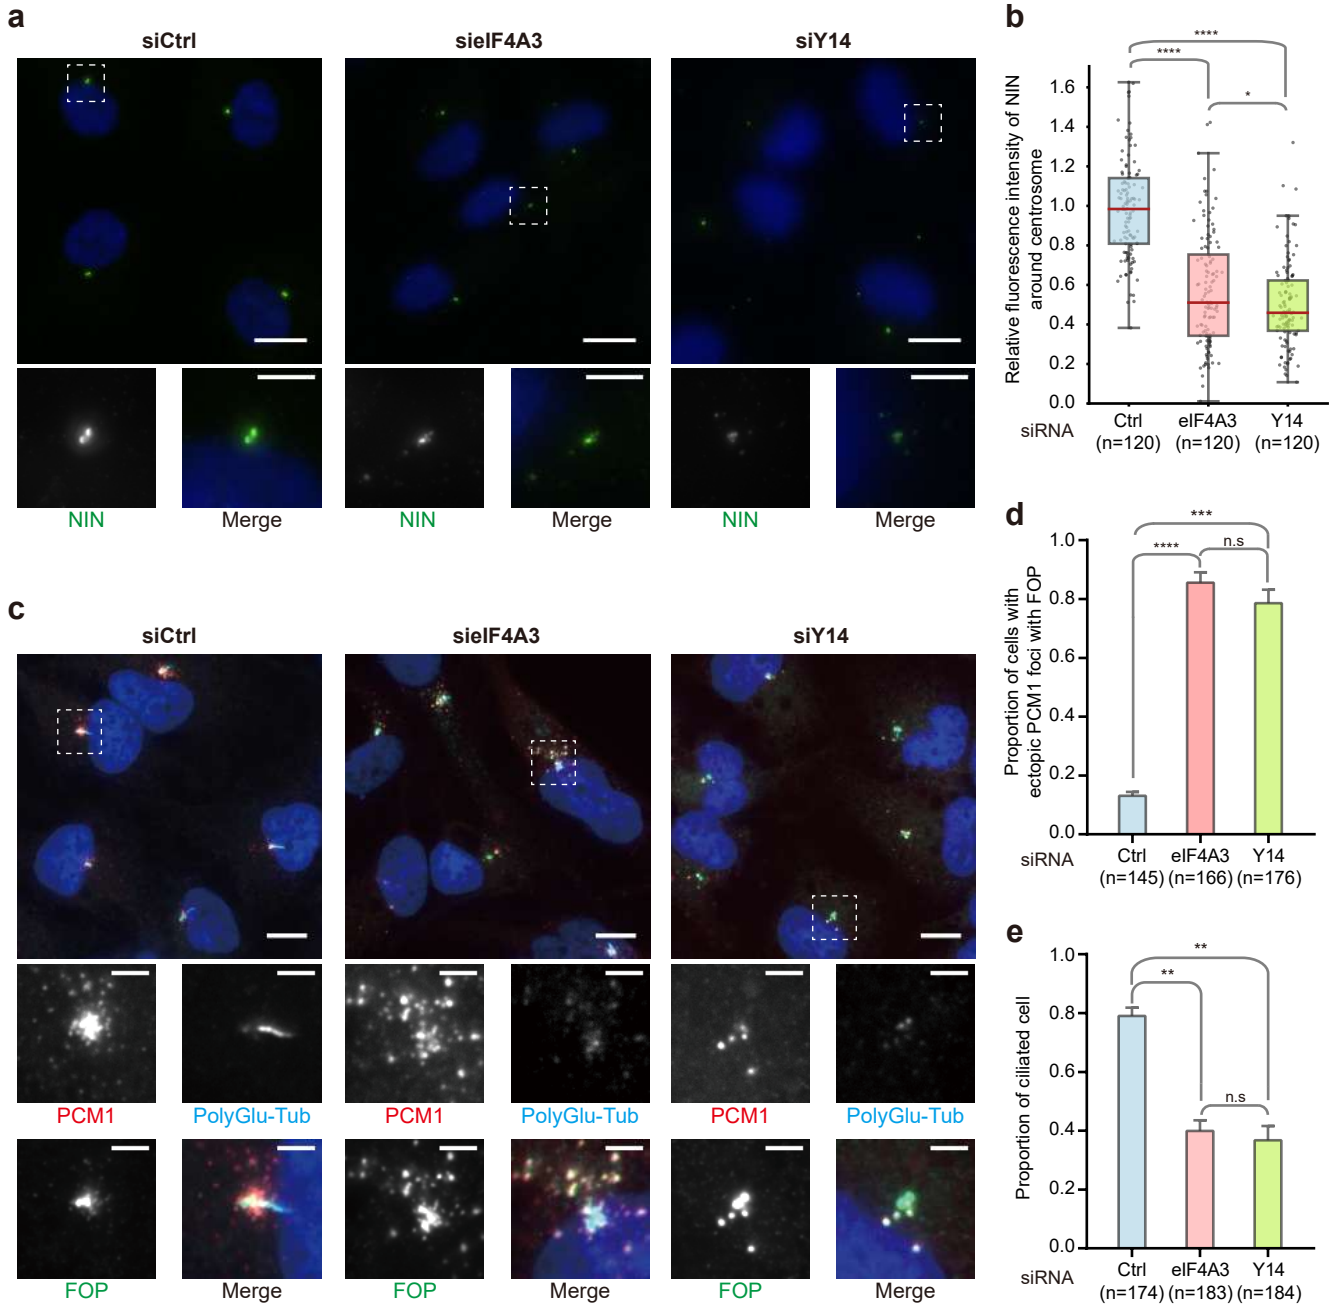



**Fig.7**

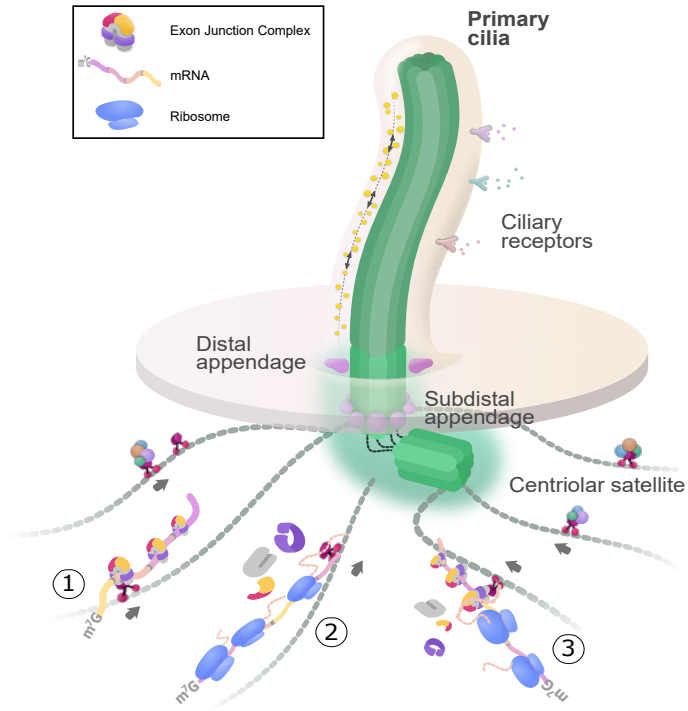

Source: https://www.biorxiv.org/content/10.1101/2020.10.28.358960v1.full.pdf
