# Supplementary material for: Exon Junction Complex dependent mRNA localization is linked to centrosome organization during ciliogenesis
Source: bioRxiv or medRxiv preprint supplement (doi:10.1101/2020.10.28.358960), 2020-10-28
Supplement: Supplementary file [file media-1.pdf]

**Fig.S1****a**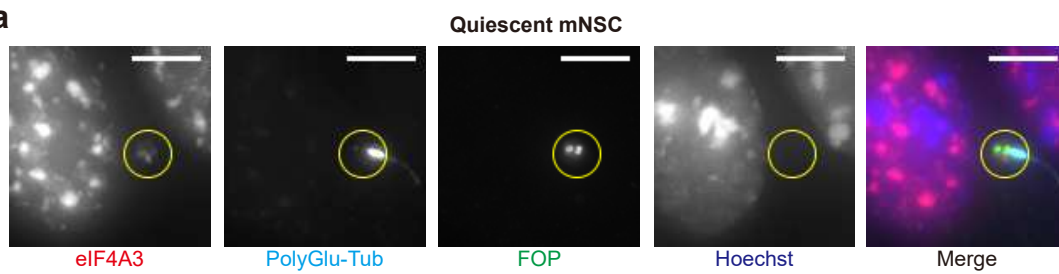**b**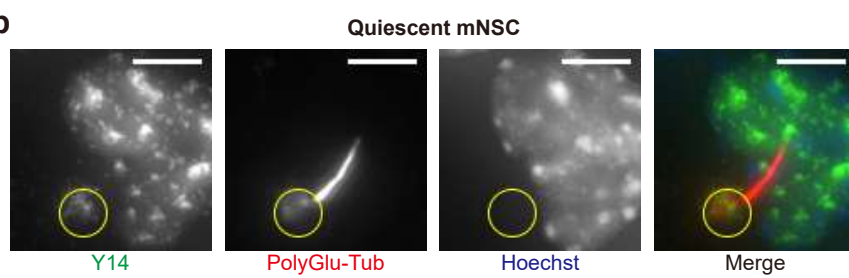**c**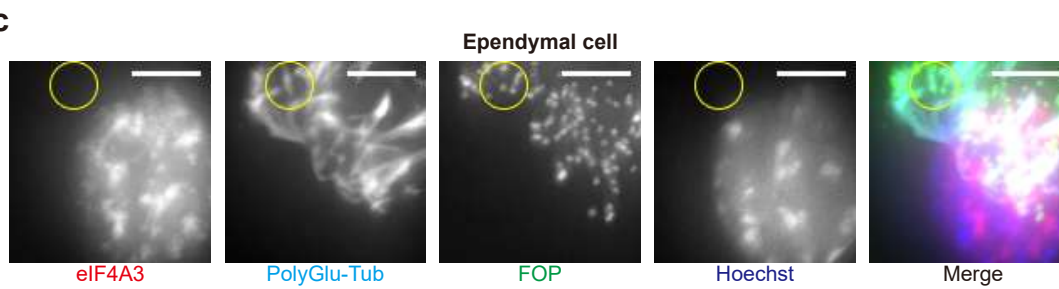**d**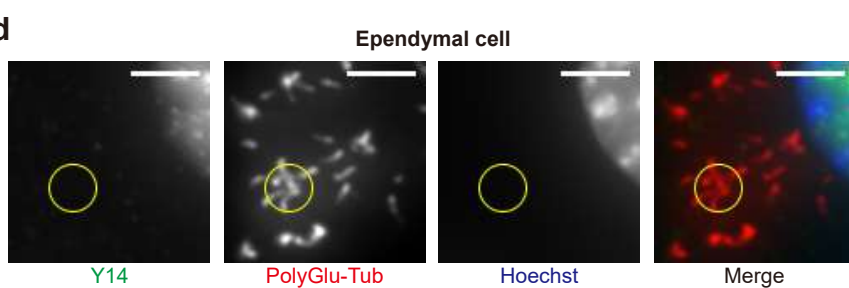**g**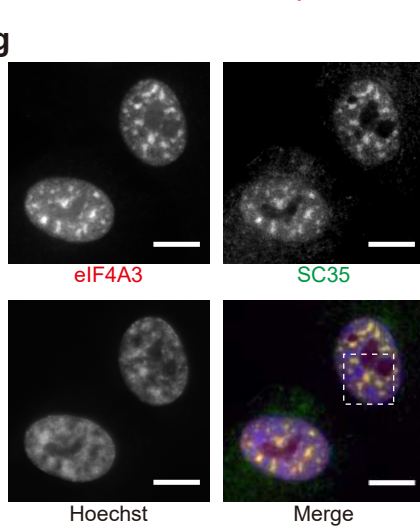**h**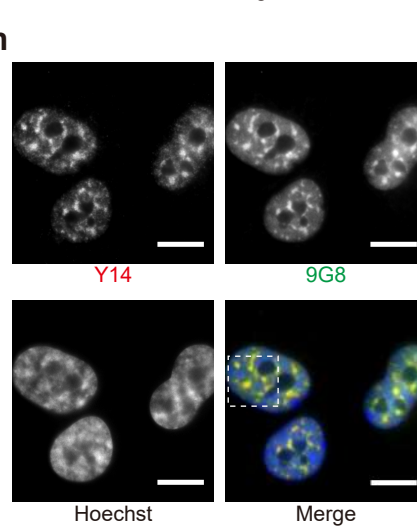**e**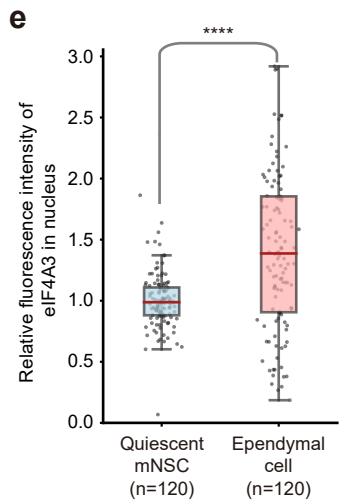**f**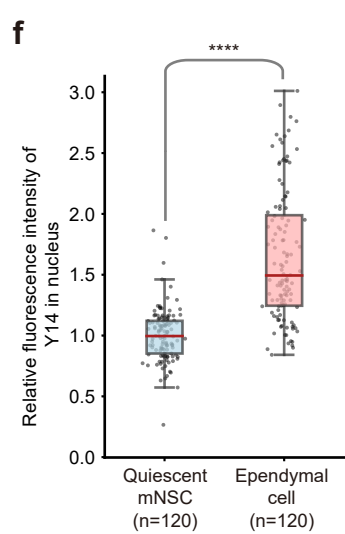**i**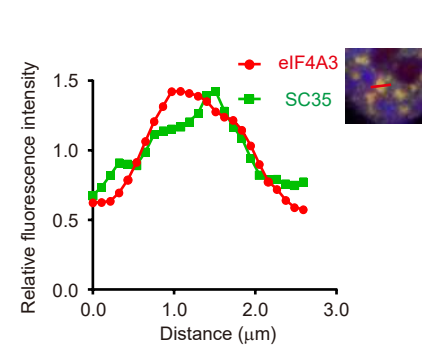**j**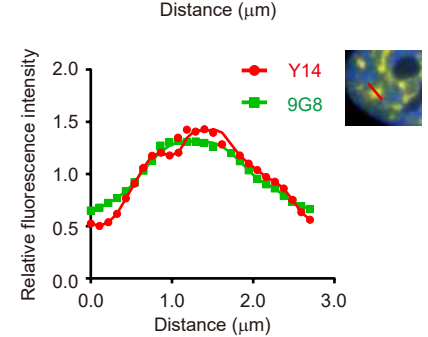

**Fig.S2**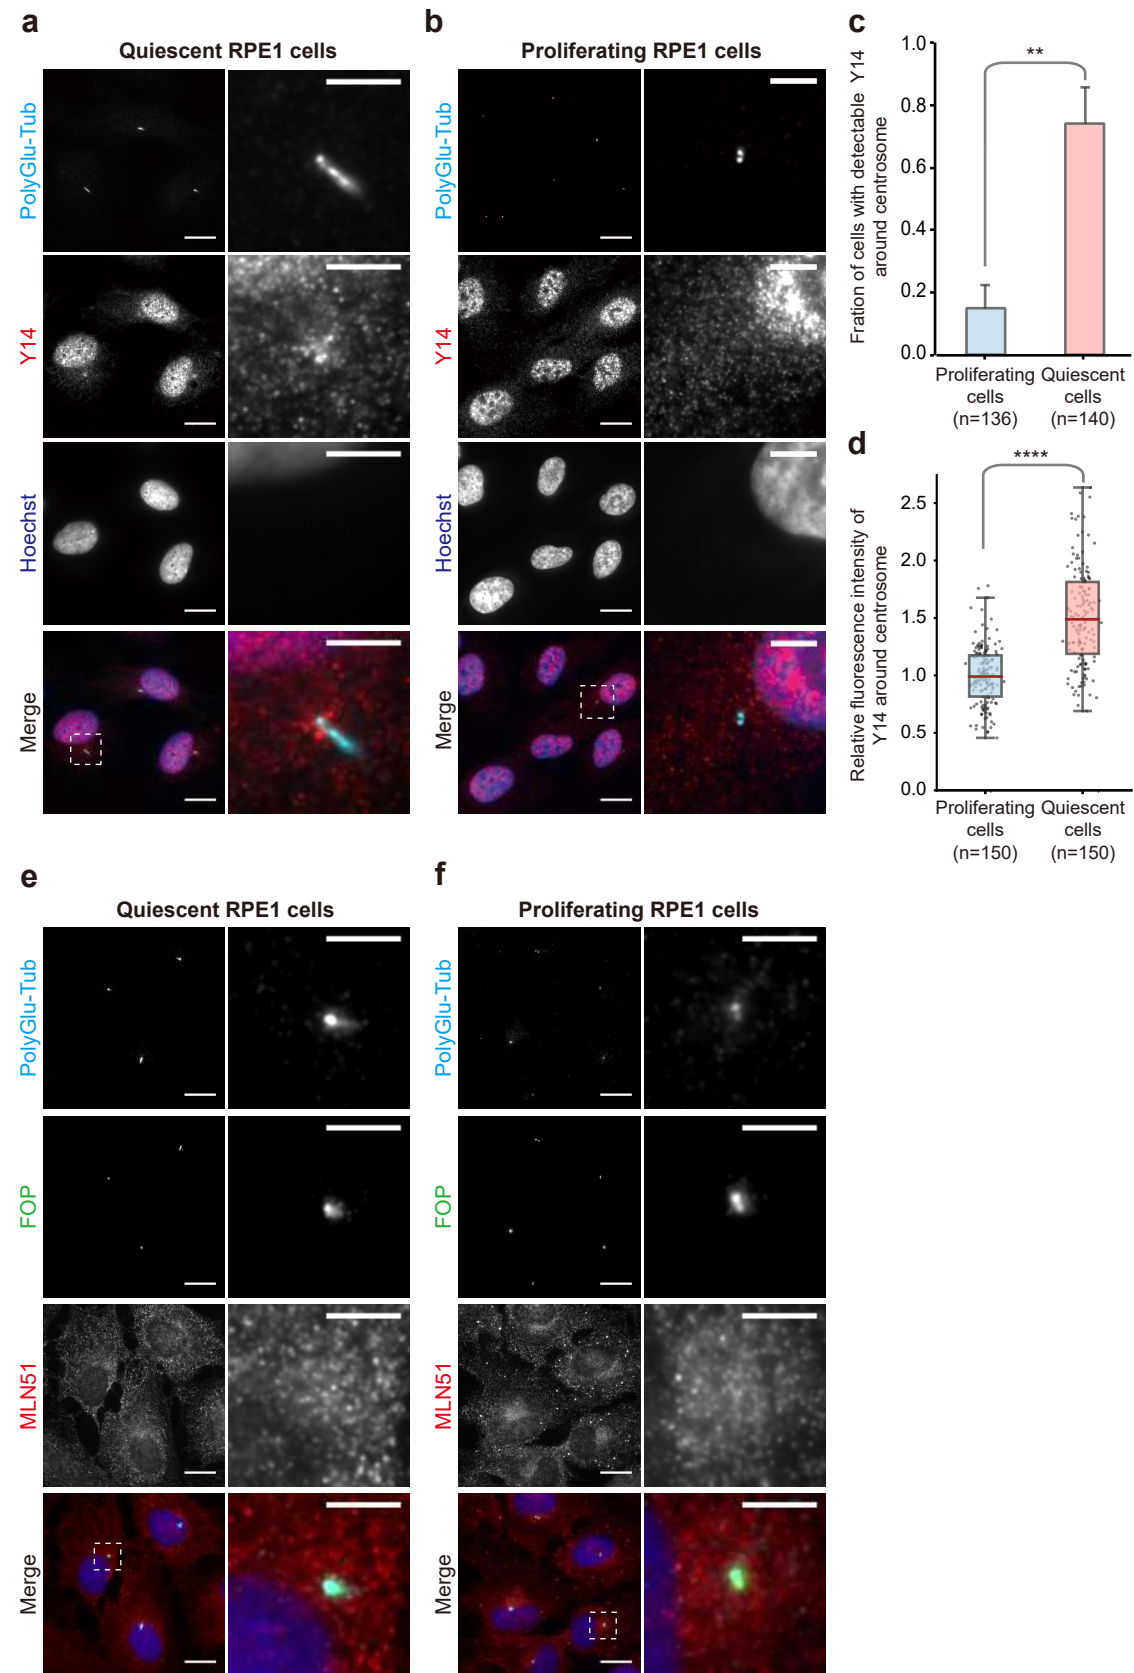

**Fig.S3**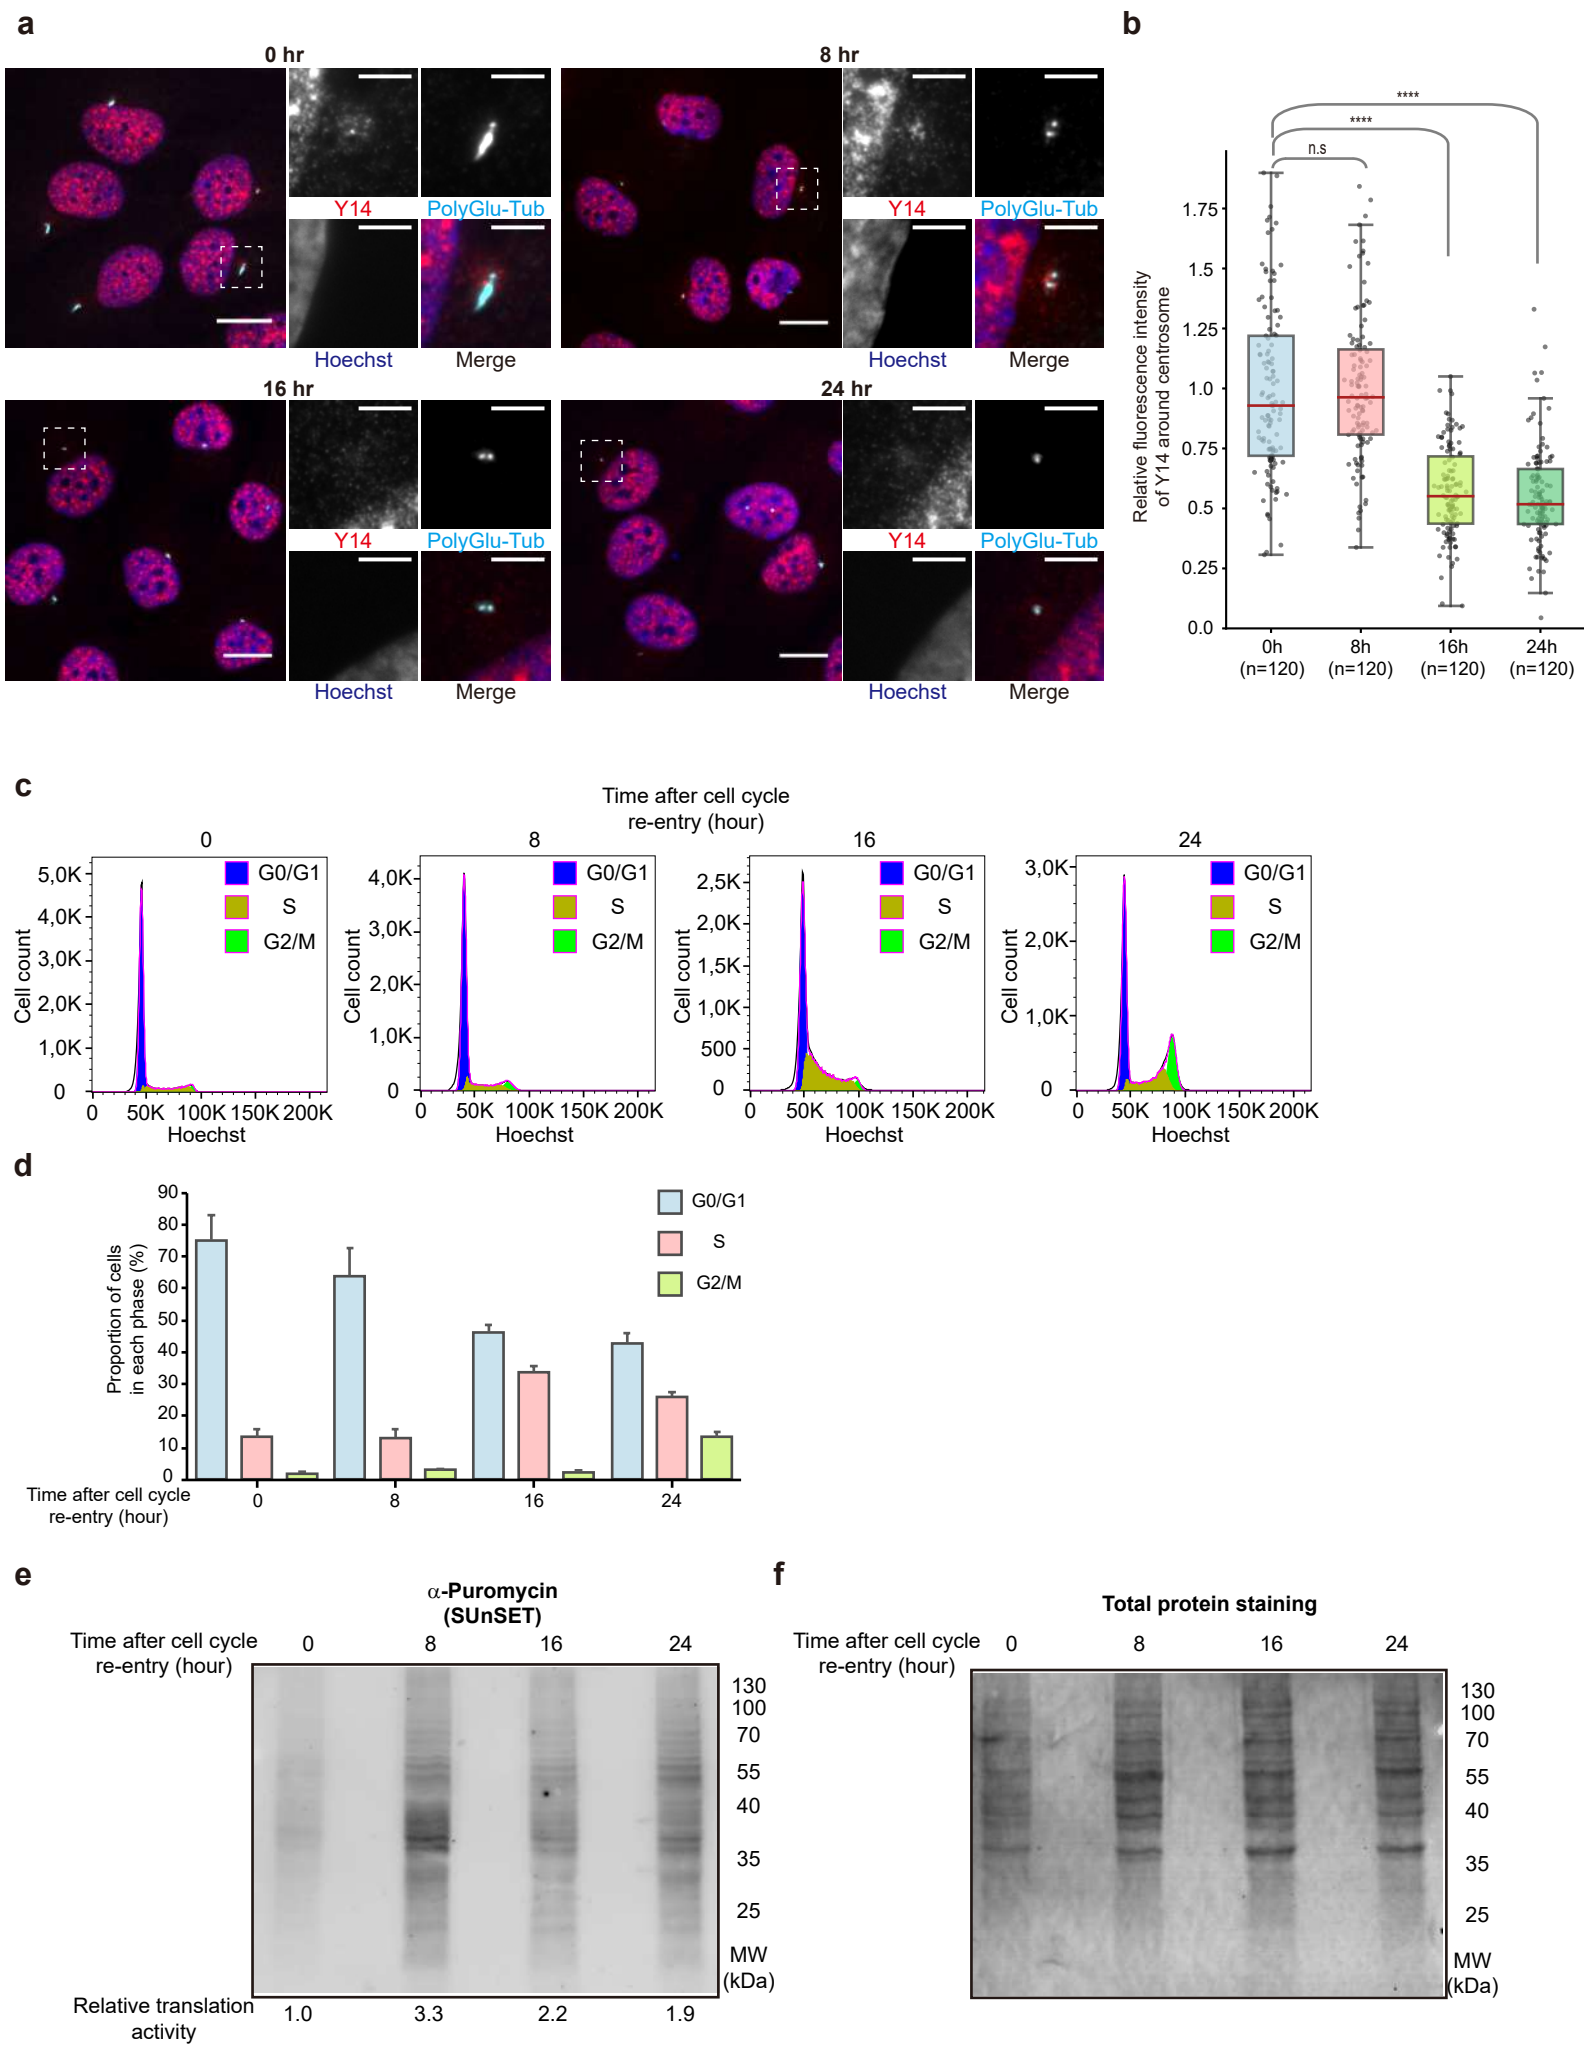

**Fig.S4**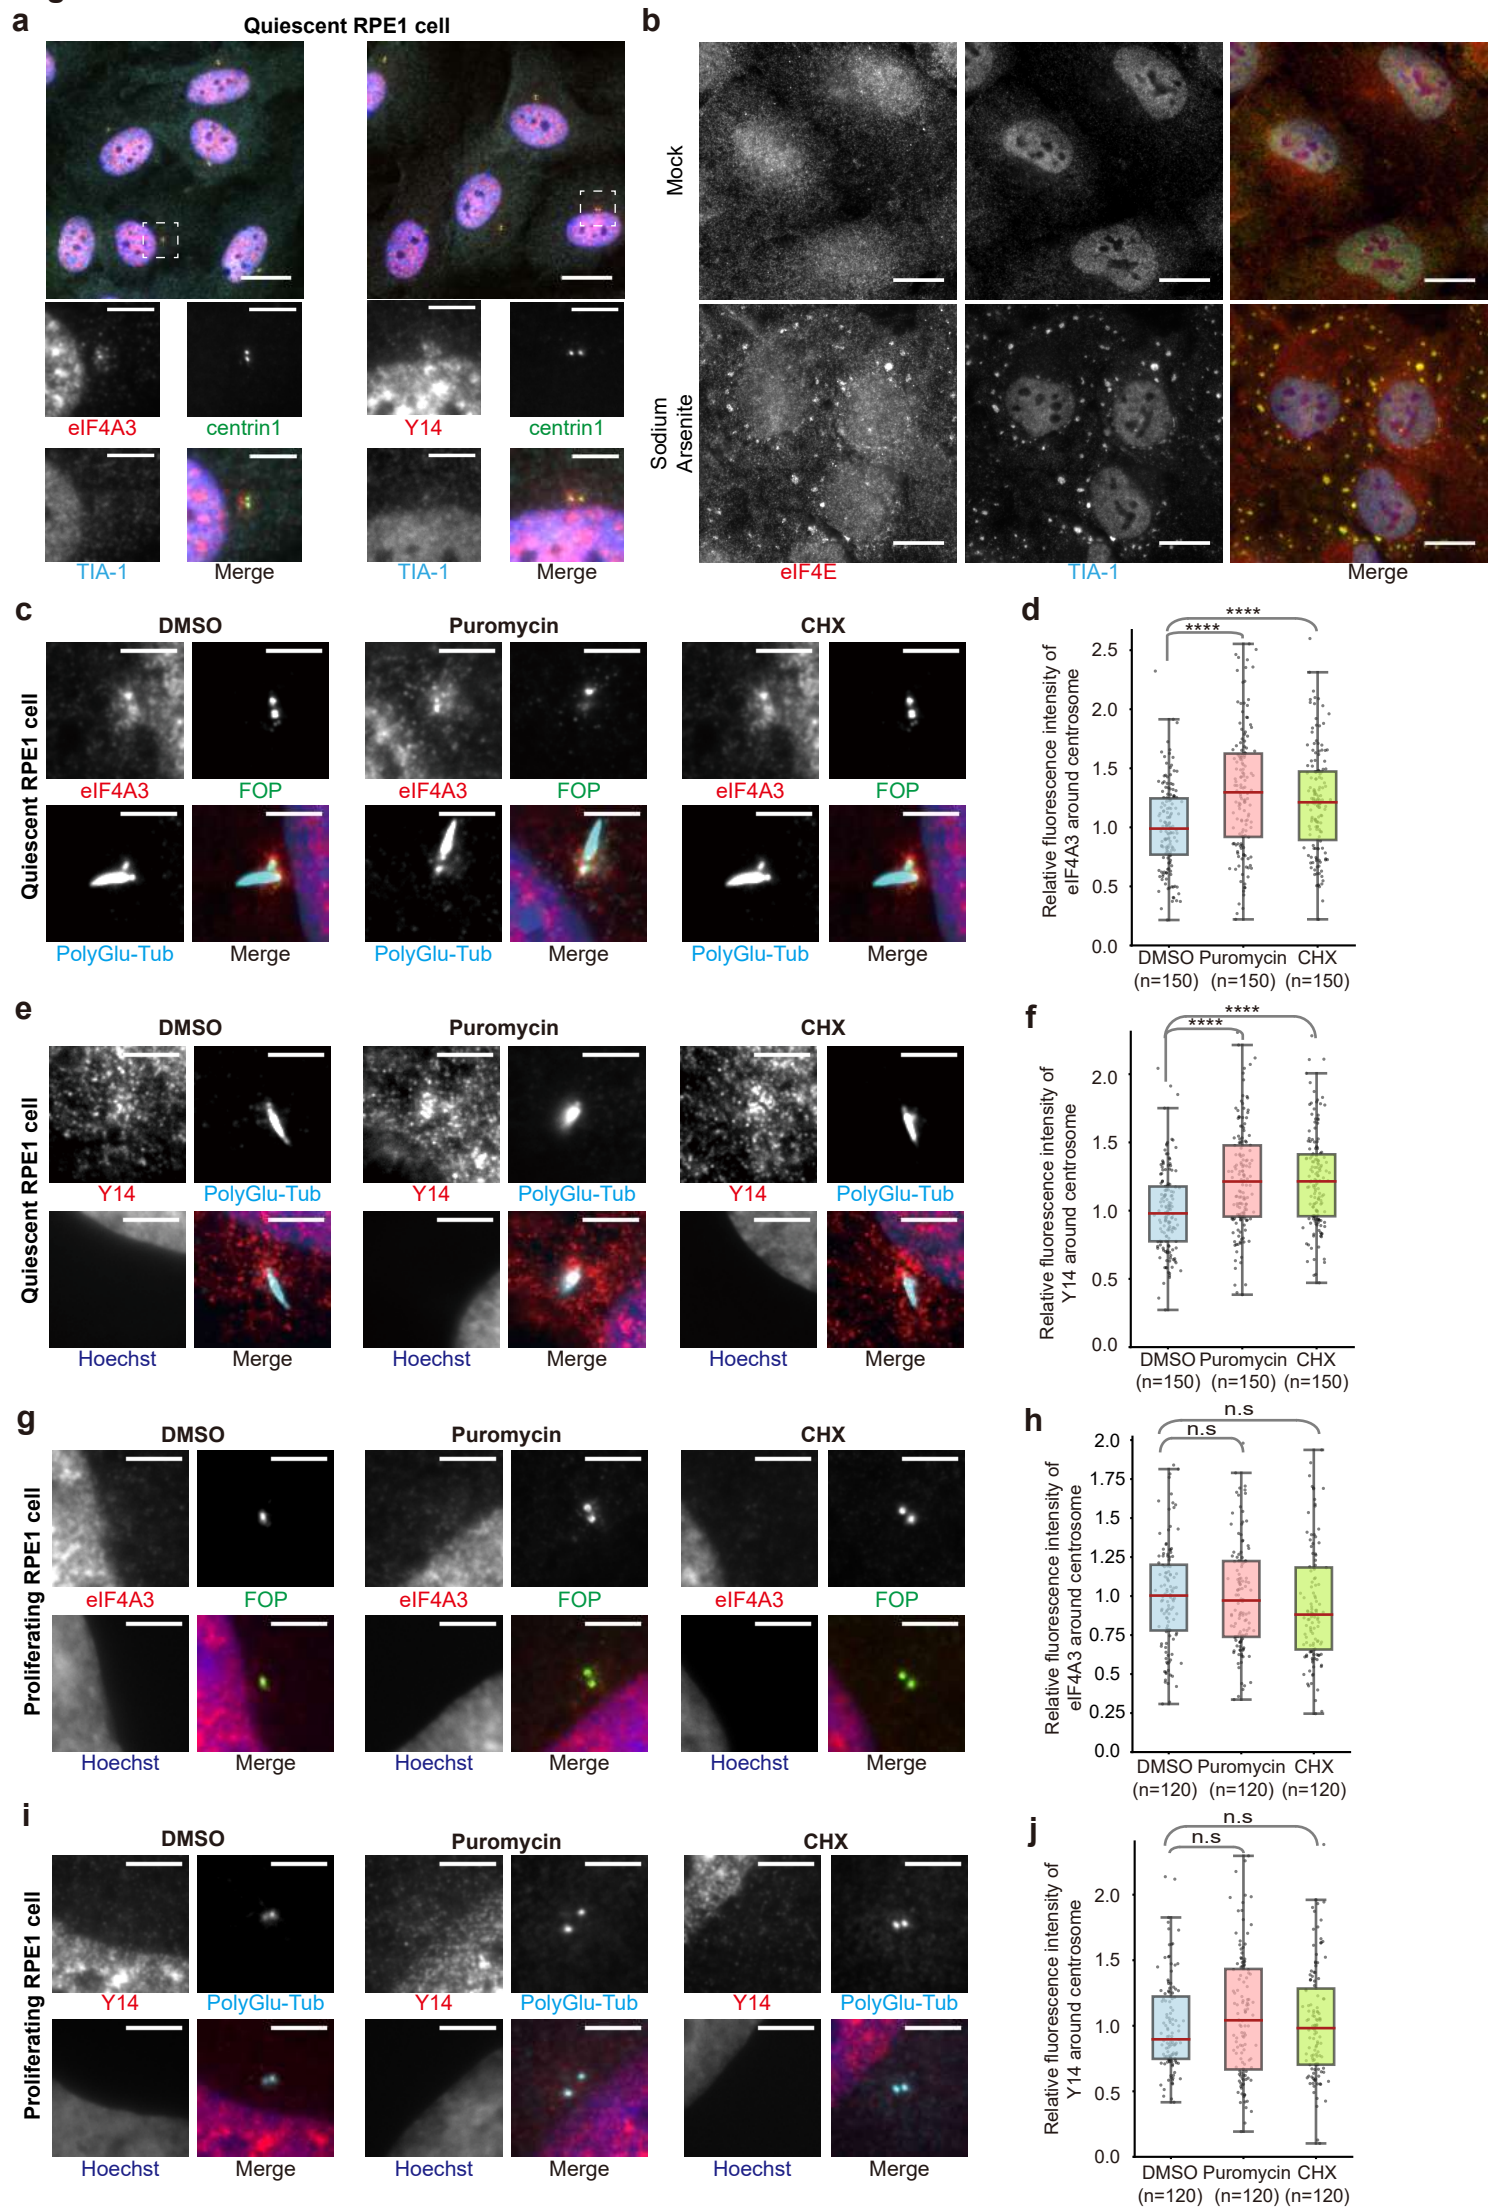

**Fig.S5**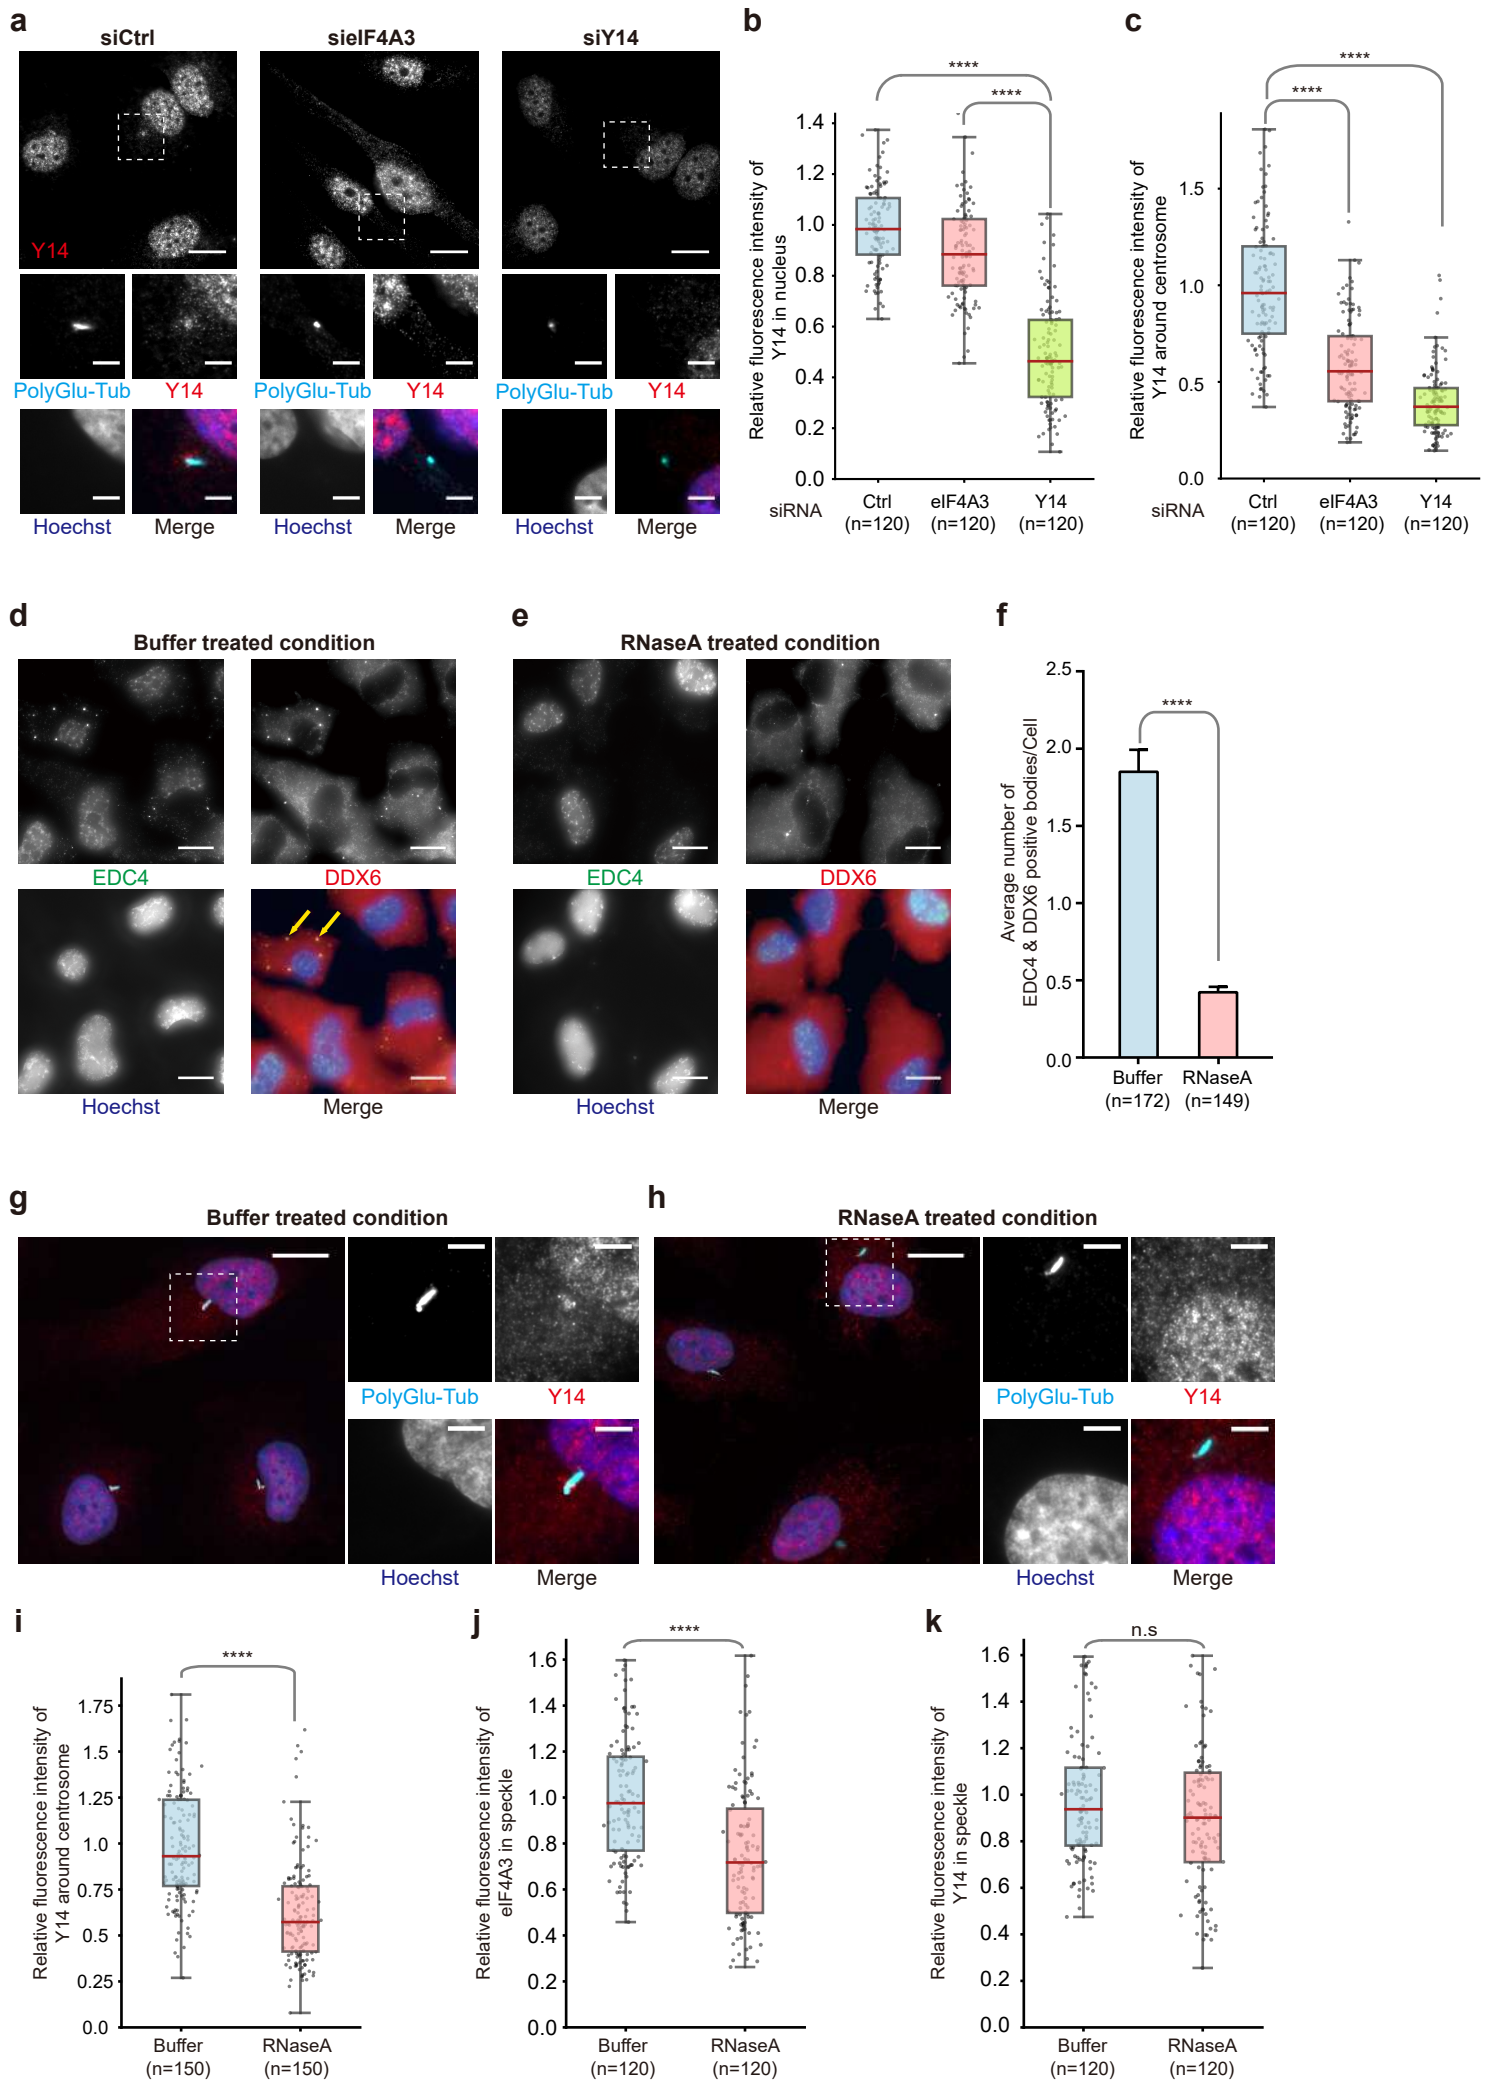

**Fig.S6**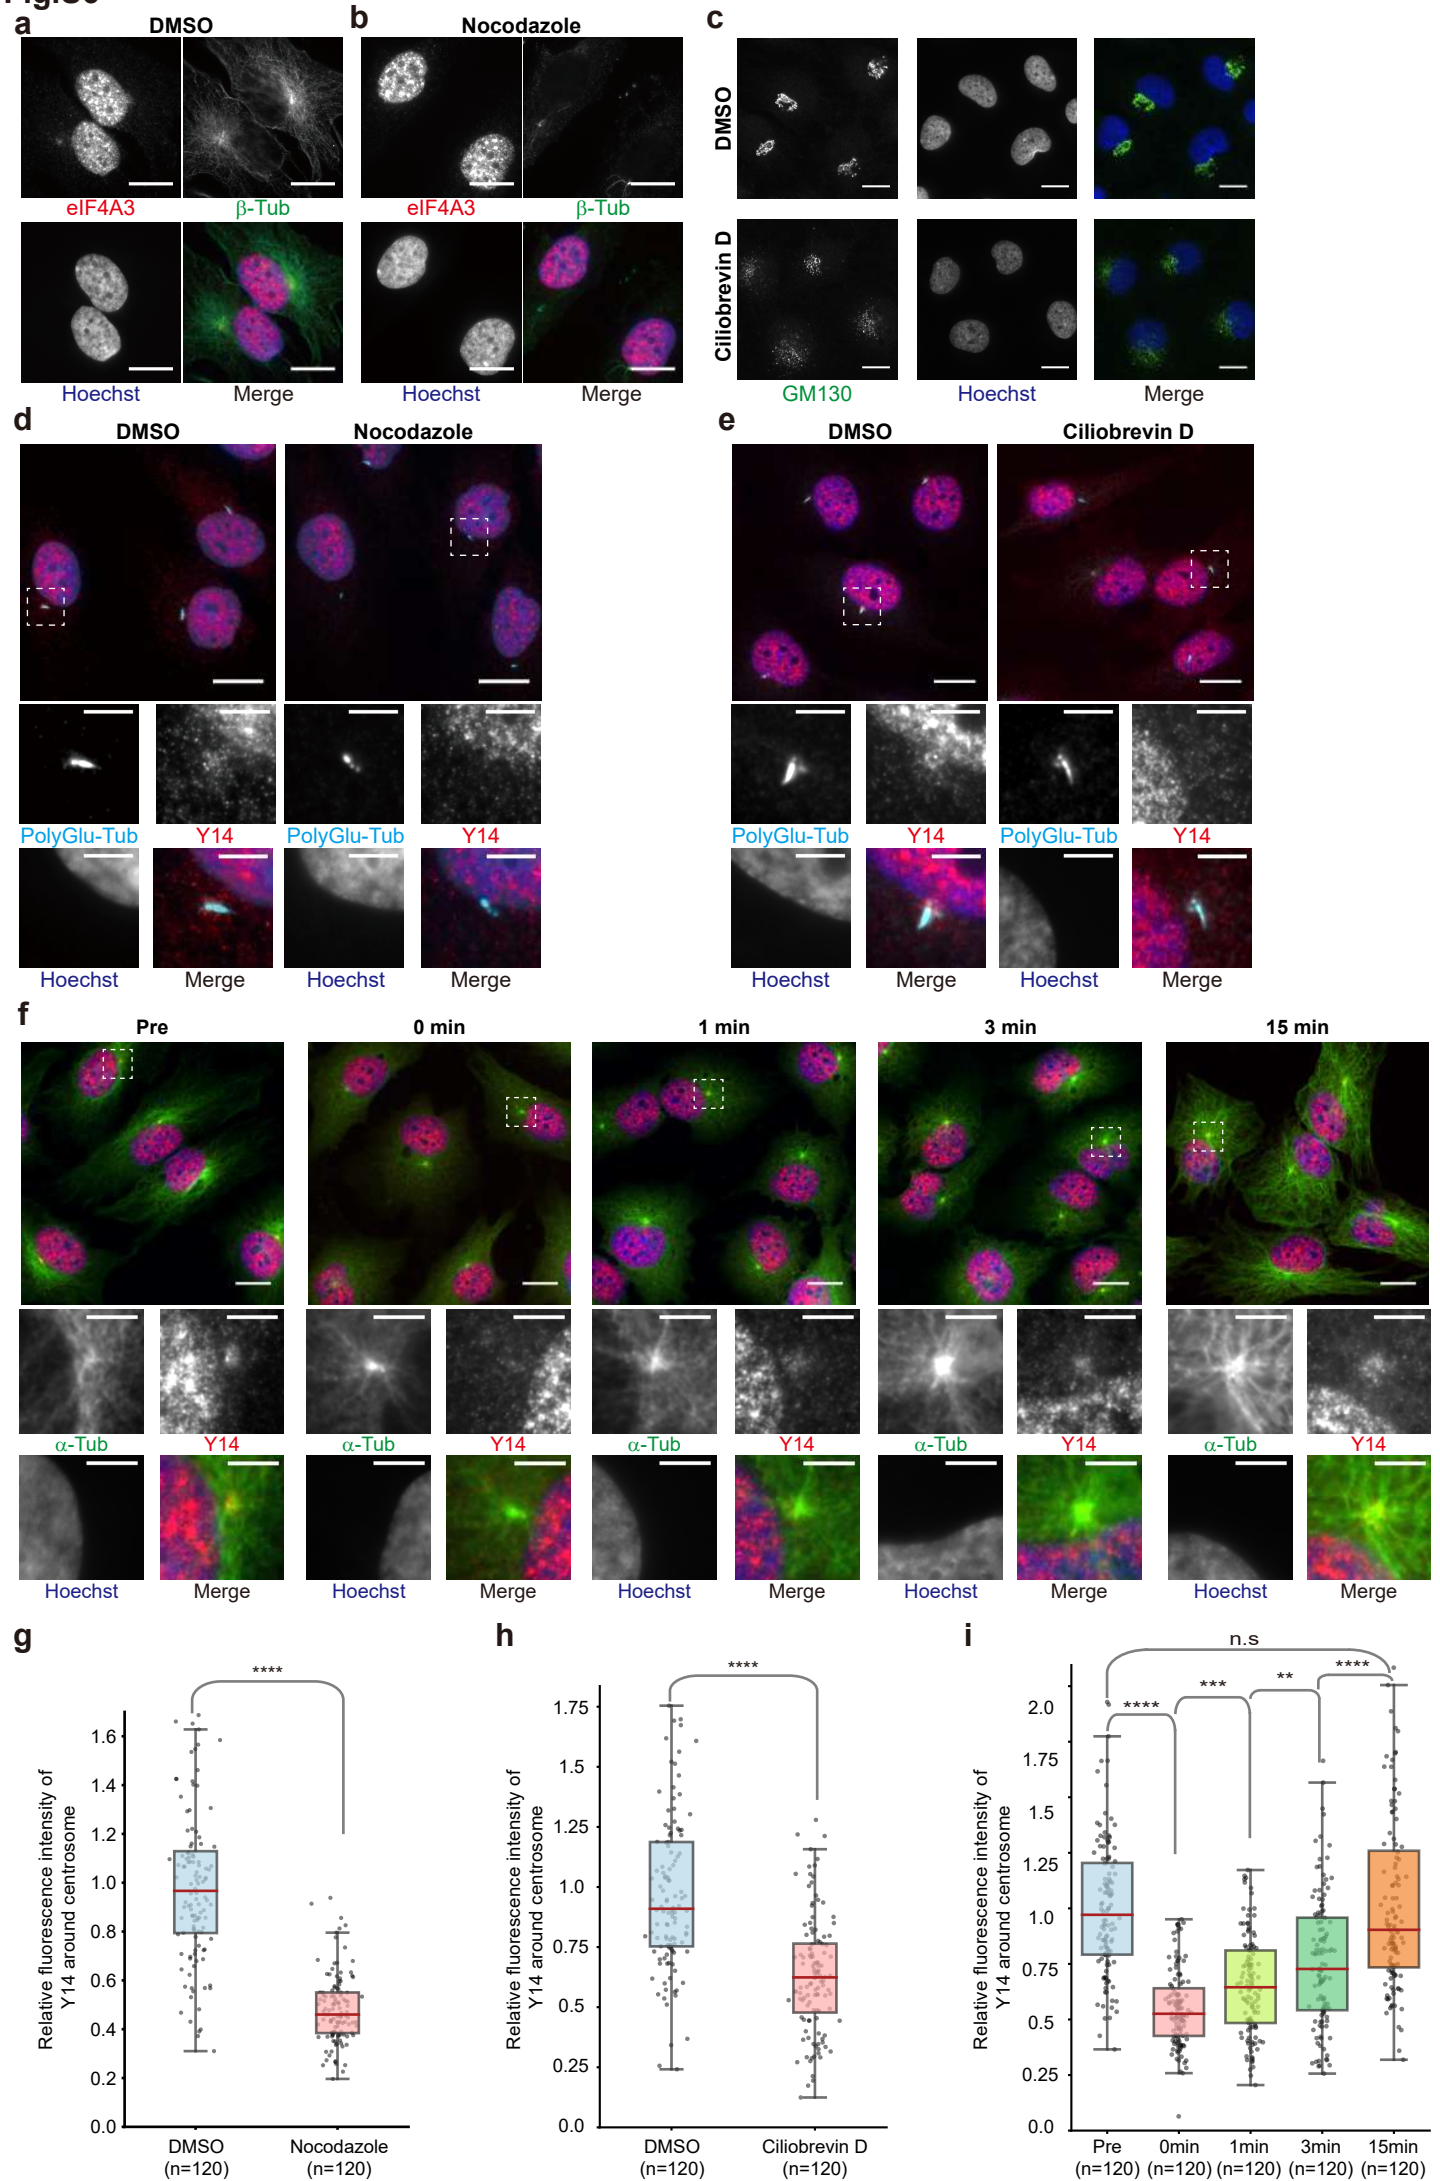

**Fig.S7**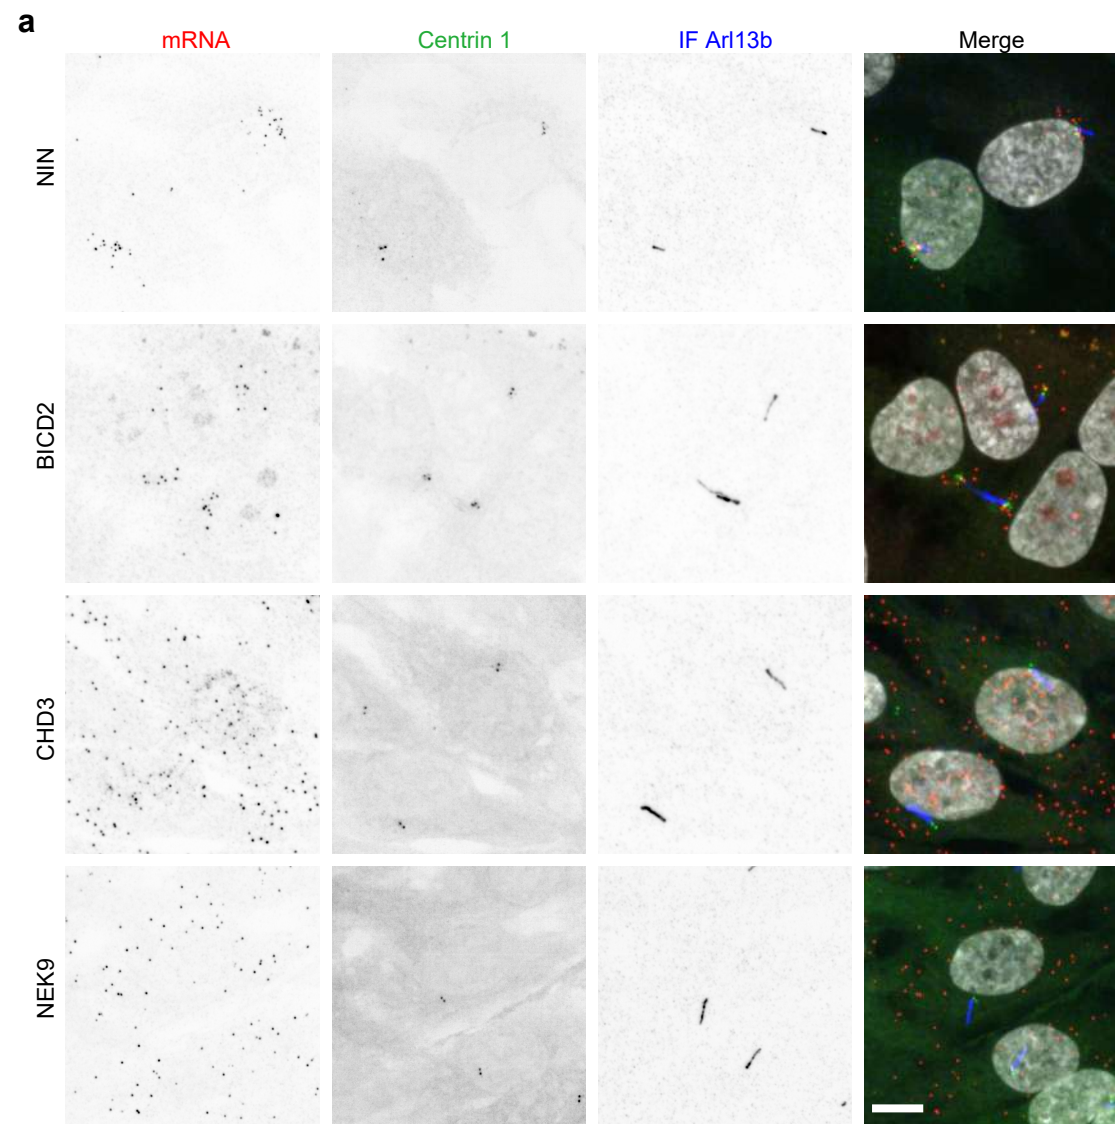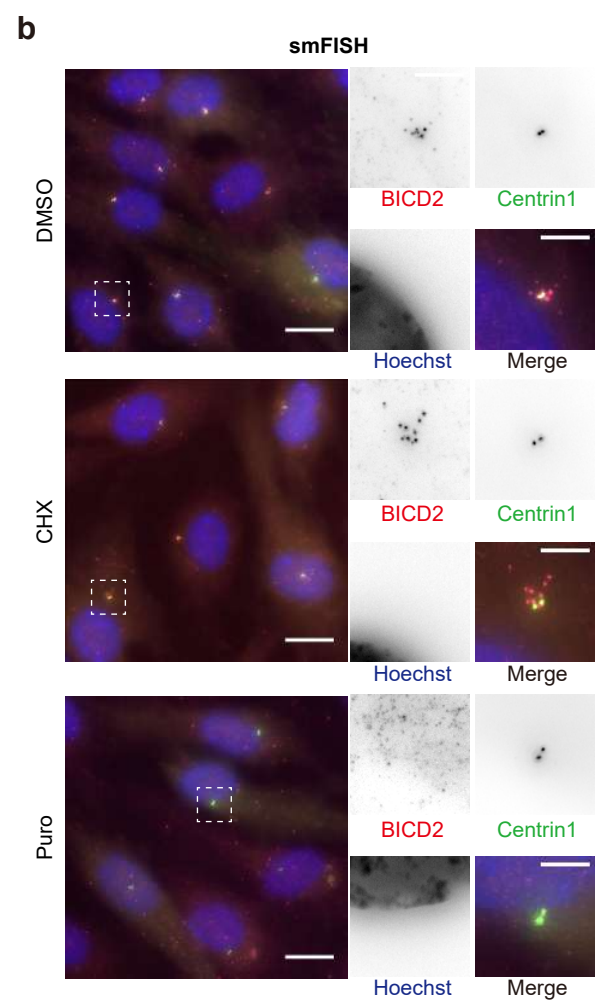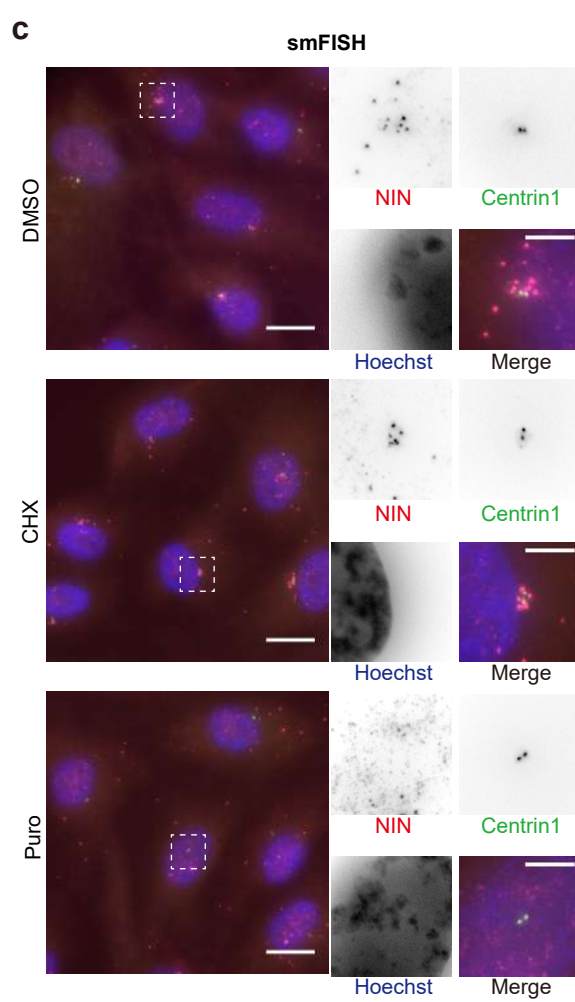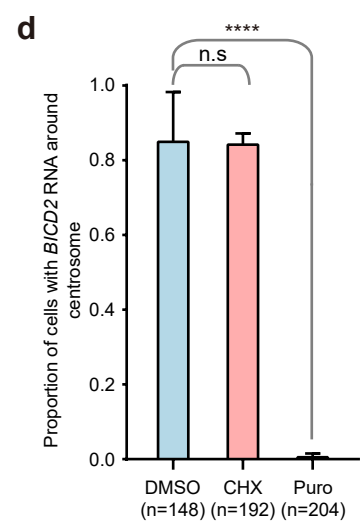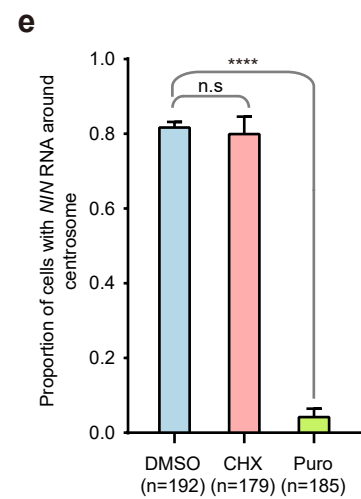

**Fig.S8**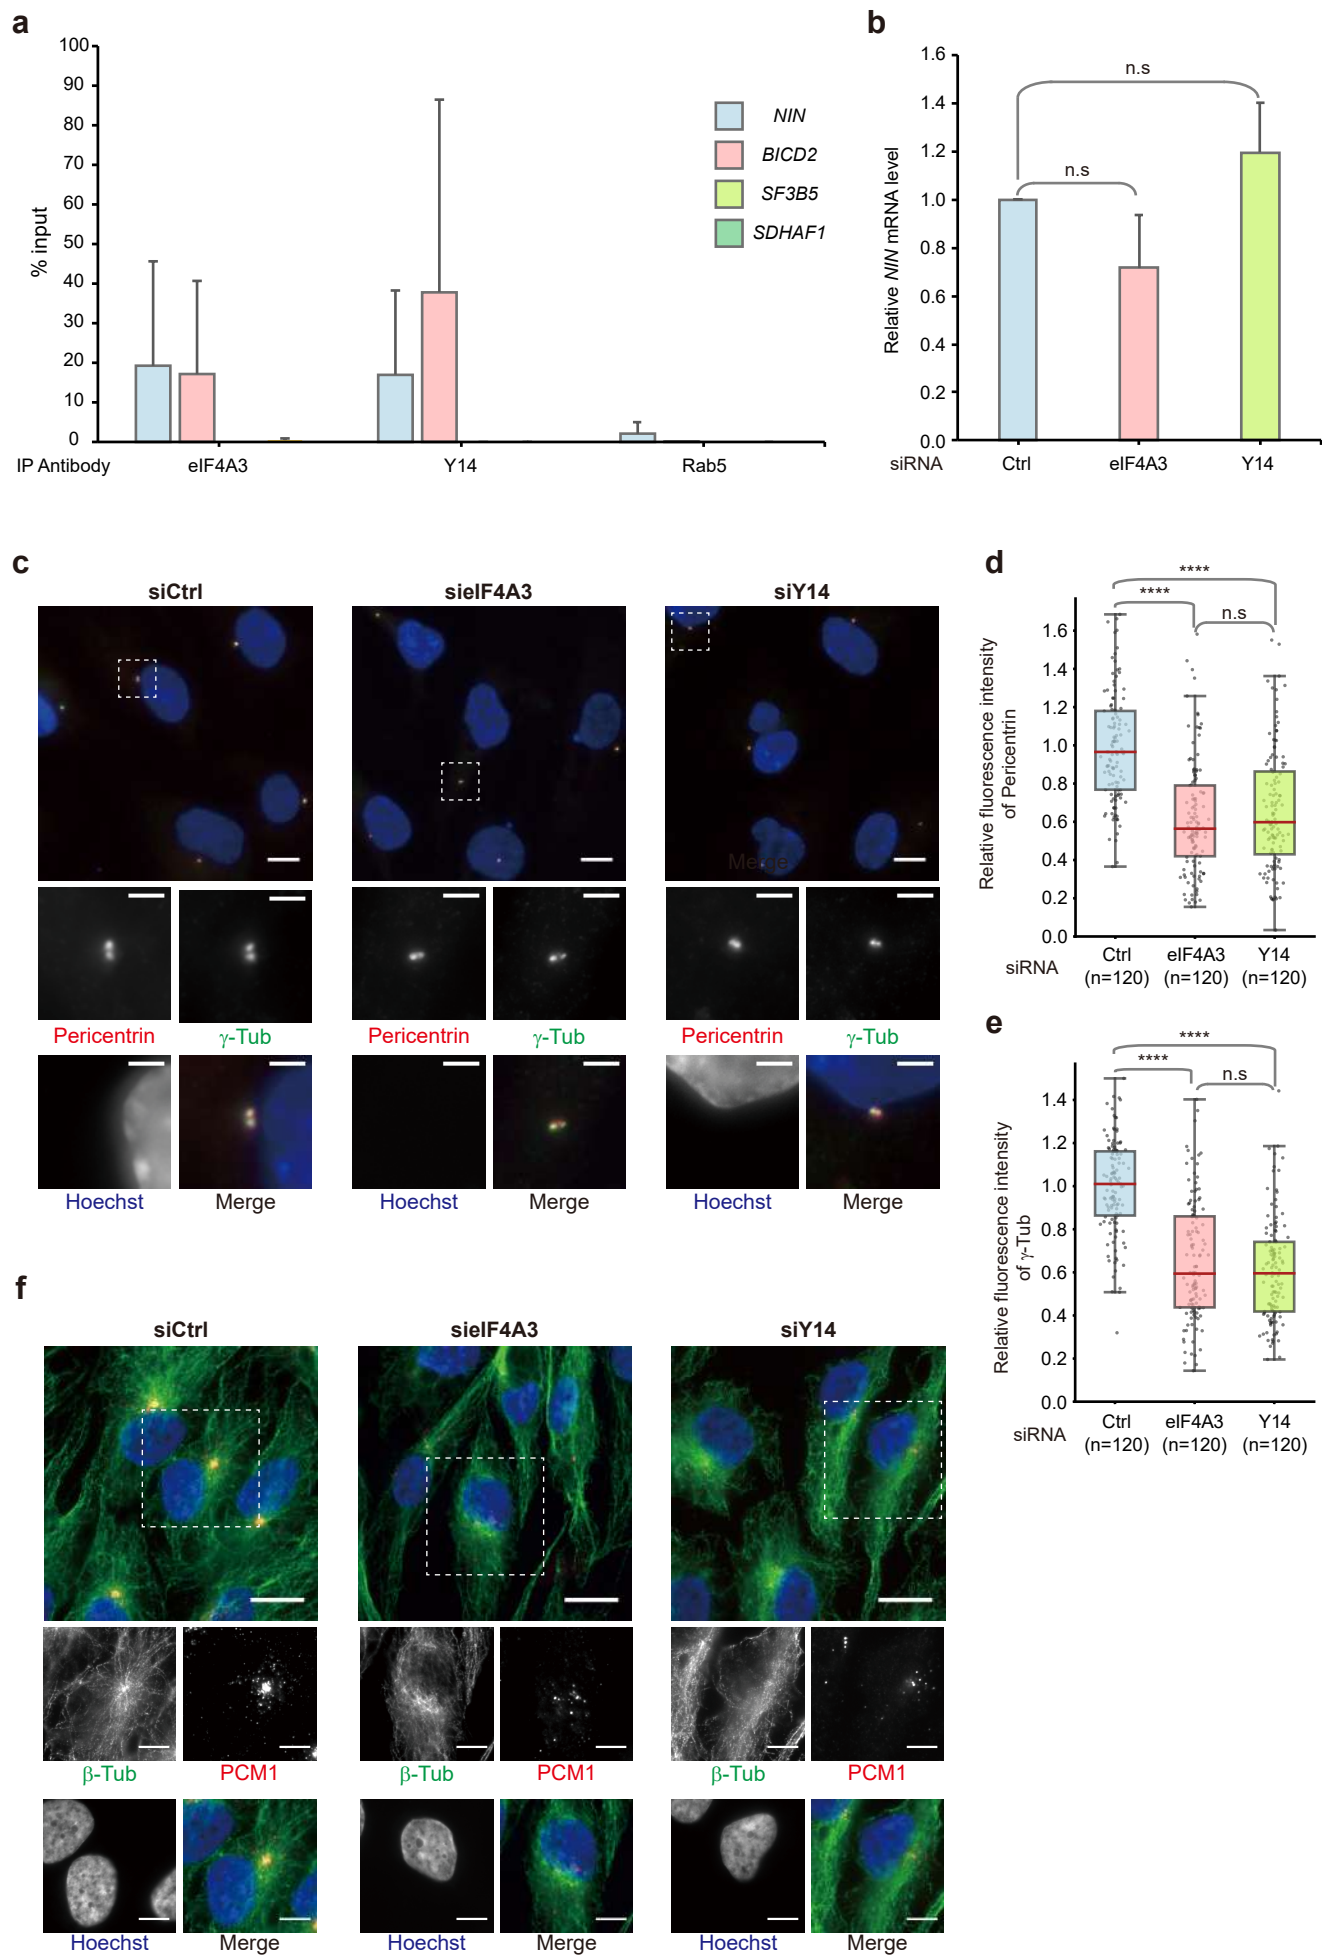



**Fig.S9**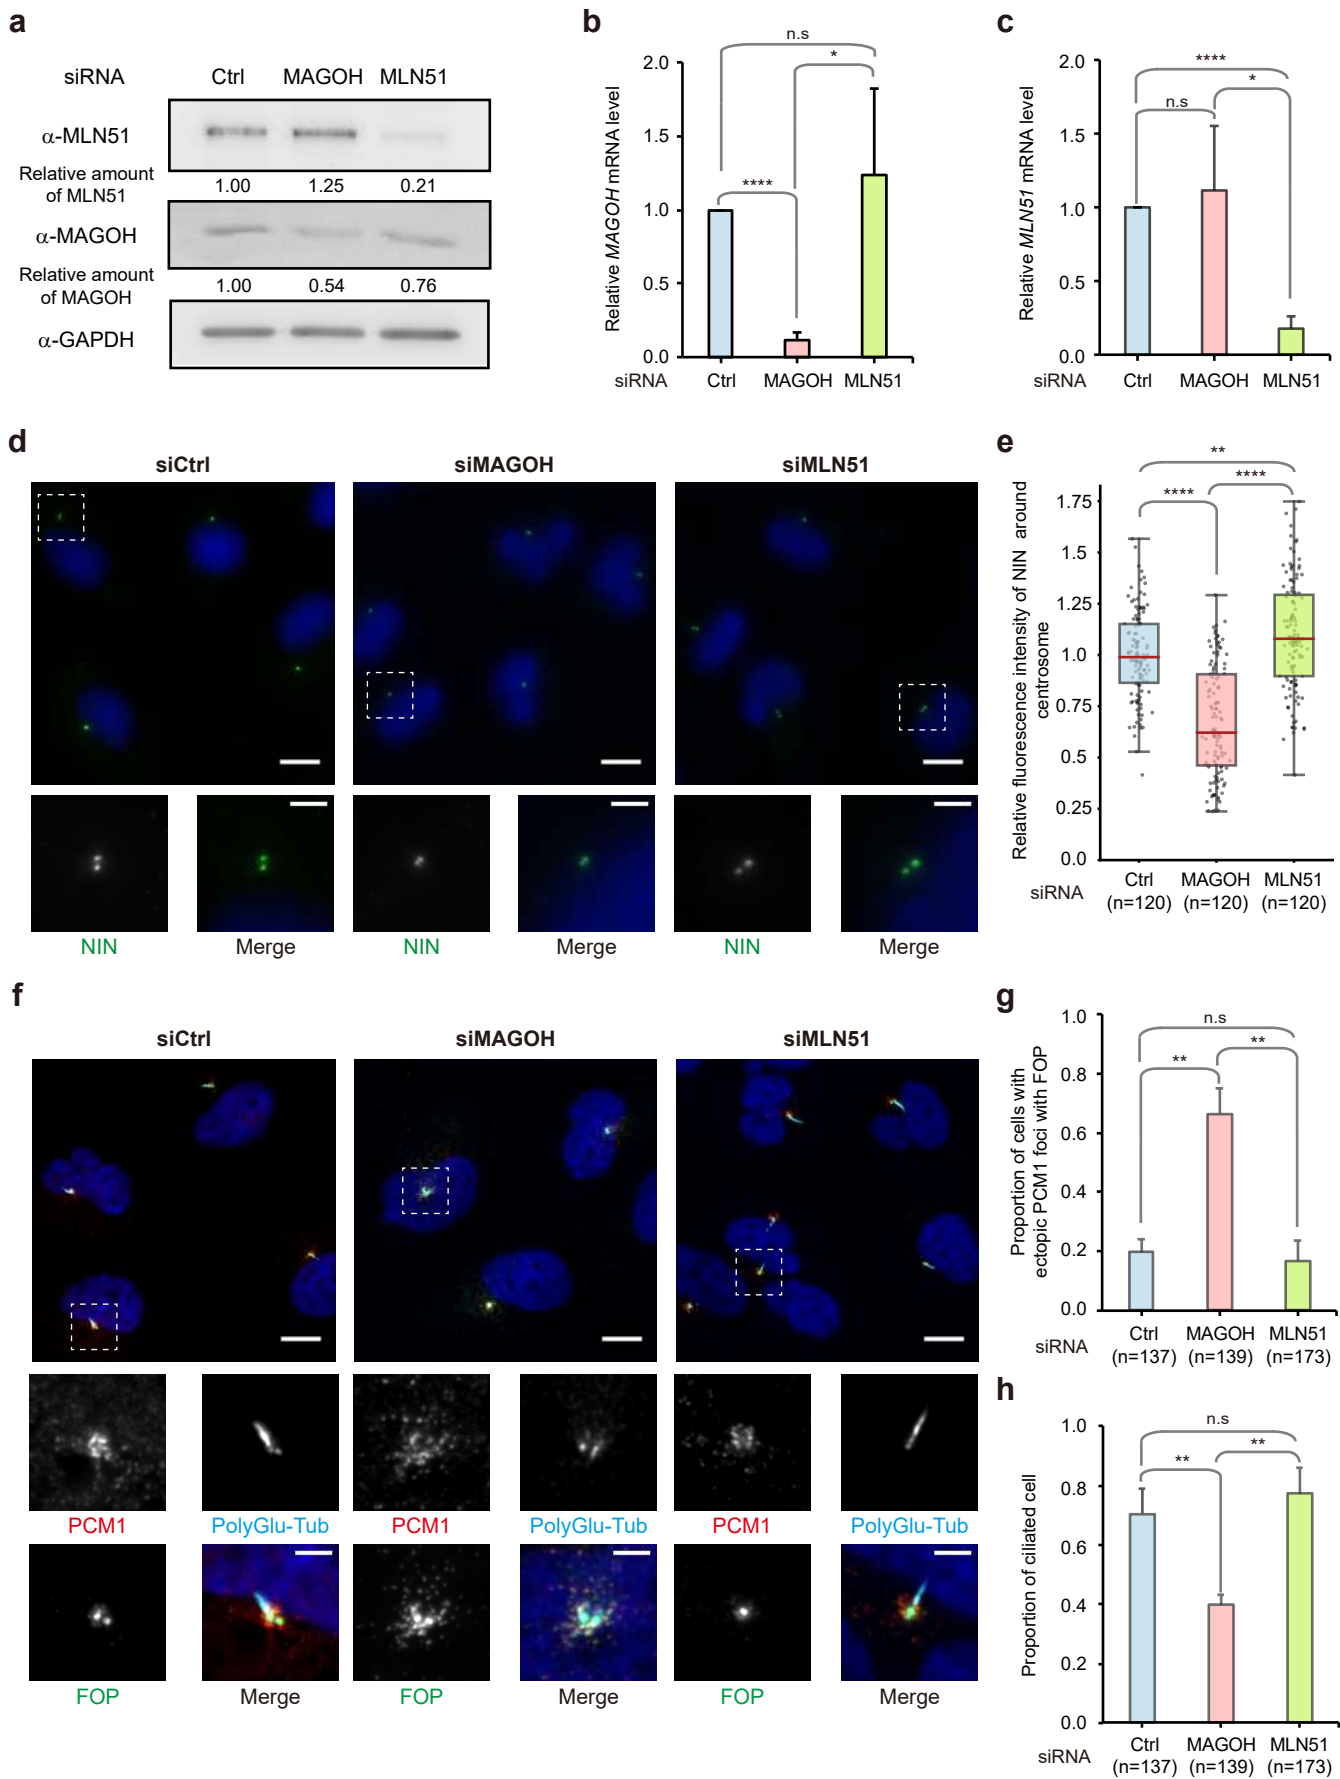

**Supplementary table S1**

| ENSG            | ENST            | GeneName   | Cell line              | Localization |
|-----------------|-----------------|------------|------------------------|--------------|
| ENSG00000185963 | ENST00000375512 | BICD2      | Diff. RPE1 GFP-Centrin | Cilium base  |
| ENSG00000100503 | ENST00000389868 | NIN        | Diff. RPE1 GFP-Centrin | Cilium base  |
| ENSG00000122545 | ENST00000399035 | SEPT7      | Diff. RPE1 GFP-Centrin | Clusters     |
| ENSG00000138160 | ENST00000260731 | KIF11      | Diff. RPE1 GFP-Centrin | Clusters     |
| ENSG00000197102 | ENST00000555062 | DYNC1H1    | Diff. RPE1 GFP-Centrin | Foci         |
| ENSG00000107581 | ENST00000369144 | EIF3A      | Diff. RPE1 GFP-Centrin | Foci         |
| ENSG00000163346 | ENST00000368463 | PBXIP1     | Diff. RPE1 GFP-Centrin | Foci         |
| ENSG00000273217 | ENST00000514667 | AC008695.1 | Diff. RPE1 GFP-Centrin | no signal    |
| ENSG00000115073 | ENST00000289228 | ACTR1B     | Diff. RPE1 GFP-Centrin | no signal    |
| ENSG00000165923 | ENST00000525123 | AGBL2      | Diff. RPE1 GFP-Centrin | no signal    |
| ENSG00000186094 | ENST00000371839 | AGBL4      | Diff. RPE1 GFP-Centrin | no signal    |
| ENSG00000169126 | ENST00000305242 | ARMC4      | Diff. RPE1 GFP-Centrin | no signal    |
| ENSG00000039987 | ENST00000042931 | BEST2      | Diff. RPE1 GFP-Centrin | no signal    |
| ENSG00000135127 | ENST00000397558 | BICDL1     | Diff. RPE1 GFP-Centrin | no signal    |
| ENSG00000160469 | ENST00000309383 | BRSK1      | Diff. RPE1 GFP-Centrin | no signal    |
| ENSG00000154493 | ENST00000284694 | C10ORF90   | Diff. RPE1 GFP-Centrin | no signal    |
| ENSG00000205129 | ENST00000378850 | C4ORF47    | Diff. RPE1 GFP-Centrin | no signal    |
| ENSG00000181751 | ENST00000510890 | C5ORF30    | Diff. RPE1 GFP-Centrin | no signal    |
| ENSG00000004948 | ENST00000360249 | CALCR      | Diff. RPE1 GFP-Centrin | no signal    |
| ENSG00000076826 | ENST00000446248 | CAMSAP3    | Diff. RPE1 GFP-Centrin | no signal    |
| ENSG00000133962 | ENST00000256343 | CATSPERB   | Diff. RPE1 GFP-Centrin | no signal    |
| ENSG00000174898 | ENST00000381624 | CATSPERD   | Diff. RPE1 GFP-Centrin | no signal    |
| ENSG00000161180 | ENST00000292779 | CCDC116    | Diff. RPE1 GFP-Centrin | no signal    |
| ENSG00000244607 | ENST00000310232 | CCDC13     | Diff. RPE1 GFP-Centrin | no signal    |
| ENSG00000135205 | ENST00000285871 | CCDC146    | Diff. RPE1 GFP-Centrin | no signal    |
| ENSG00000182645 | ENST00000333254 | CCDC172    | Diff. RPE1 GFP-Centrin | no signal    |
| ENSG00000160050 | ENST00000373602 | CCDC28B    | Diff. RPE1 GFP-Centrin | no signal    |
| ENSG00000145075 | ENST00000273654 | CCDC39     | Diff. RPE1 GFP-Centrin | no signal    |
| ENSG00000166510 | ENST00000591504 | CCDC68     | Diff. RPE1 GFP-Centrin | no signal    |
| ENSG00000015133 | ENST00000389857 | CCDC88C    | Diff. RPE1 GFP-Centrin | no signal    |
| ENSG00000079335 | ENST00000361544 | CDC14A     | Diff. RPE1 GFP-Centrin | no signal    |
| ENSG00000170312 | ENST00000395284 | CDK1       | Diff. RPE1 GFP-Centrin | no signal    |
| ENSG00000100629 | ENST00000281129 | CEP128     | Diff. RPE1 GFP-Centrin | no signal    |
| ENSG00000154608 | ENST00000502249 | CEP170P1   | Diff. RPE1 GFP-Centrin | no signal    |
| ENSG00000112877 | ENST00000264935 | CEP72      | Diff. RPE1 GFP-Centrin | no signal    |
| ENSG00000101624 | ENST00000262127 | CEP76      | Diff. RPE1 GFP-Centrin | no signal    |
| ENSG00000111860 | ENST00000368488 | CEP85L     | Diff. RPE1 GFP-Centrin | no signal    |
| ENSG00000121289 | ENST00000305768 | CEP89      | Diff. RPE1 GFP-Centrin | no signal    |
| ENSG00000163885 | ENST00000352312 | CFAP100    | Diff. RPE1 GFP-Centrin | no signal    |
| ENSG00000188931 | ENST00000367974 | CFAP126    | Diff. RPE1 GFP-Centrin | no signal    |
| ENSG00000160401 | ENST00000373295 | CFAP157    | Diff. RPE1 GFP-Centrin | no signal    |
| ENSG00000070761 | ENST00000262498 | CFAP20     | Diff. RPE1 GFP-Centrin | no signal    |
| ENSG00000272514 | ENST00000369562 | CFAP206    | Diff. RPE1 GFP-Centrin | no signal    |
| ENSG00000163075 | ENST00000413057 | CFAP221    | Diff. RPE1 GFP-Centrin | no signal    |
| ENSG00000213085 | ENST00000368099 | CFAP45     | Diff. RPE1 GFP-Centrin | no signal    |
| ENSG00000171811 | ENST00000368586 | CFAP46     | Diff. RPE1 GFP-Centrin | no signal    |
| ENSG00000172361 | ENST00000398545 | CFAP53     | Diff. RPE1 GFP-Centrin | no signal    |
| ENSG00000156042 | ENST00000310715 | CFAP70     | Diff. RPE1 GFP-Centrin | no signal    |
| ENSG00000186710 | ENST00000335621 | CFAP73     | Diff. RPE1 GFP-Centrin | no signal    |
| ENSG00000169607 | ENST00000541405 | CKAP2L     | Diff. RPE1 GFP-Centrin | no signal    |

|                 |                 |          |                        |           |
|-----------------|-----------------|----------|------------------------|-----------|
| ENSG00000126890 | ENST00000247306 | CTAG2    | Diff. RPE1 GFP-Centrin | no signal |
| ENSG00000165325 | ENST00000298050 | DEUP1    | Diff. RPE1 GFP-Centrin | no signal |
| ENSG00000166938 | ENST00000319194 | DIS3L    | Diff. RPE1 GFP-Centrin | no signal |
| ENSG00000166938 | ENST00000319194 | DIS3L    | Diff. RPE1 GFP-Centrin | no signal |
| ENSG00000105877 | ENST00000409508 | DNAH11   | Diff. RPE1 GFP-Centrin | no signal |
| ENSG00000174844 | ENST00000311202 | DNAH12   | Diff. RPE1 GFP-Centrin | no signal |
| ENSG00000158486 | ENST00000261383 | DNAH3    | Diff. RPE1 GFP-Centrin | no signal |
| ENSG00000039139 | ENST00000265104 | DNAH5    | Diff. RPE1 GFP-Centrin | no signal |
| ENSG00000115423 | ENST00000389394 | DNAH6    | Diff. RPE1 GFP-Centrin | no signal |
| ENSG00000118997 | ENST00000312428 | DNAH7    | Diff. RPE1 GFP-Centrin | no signal |
| ENSG00000124721 | ENST00000327475 | DNAH8    | Diff. RPE1 GFP-Centrin | no signal |
| ENSG00000197959 | ENST00000367731 | DNM3     | Diff. RPE1 GFP-Centrin | no signal |
| ENSG00000144635 | ENST00000273130 | DYNC1LI1 | Diff. RPE1 GFP-Centrin | no signal |
| ENSG00000096093 | ENST00000371068 | EFHC1    | Diff. RPE1 GFP-Centrin | no signal |
| ENSG00000013016 | ENST00000322054 | EHD3     | Diff. RPE1 GFP-Centrin | no signal |
| ENSG00000151023 | ENST00000376363 | ENKUR    | Diff. RPE1 GFP-Centrin | no signal |
| ENSG00000165689 | ENST00000371725 | ENTR1    | Diff. RPE1 GFP-Centrin | no signal |
| ENSG00000173040 | ENST00000344408 | EVC2     | Diff. RPE1 GFP-Centrin | no signal |
| ENSG00000182263 | ENST00000333129 | FIGN     | Diff. RPE1 GFP-Centrin | no signal |
| ENSG00000189139 | ENST00000340446 | FSCB     | Diff. RPE1 GFP-Centrin | no signal |
| ENSG00000065135 | ENST00000369851 | GNAI3    | Diff. RPE1 GFP-Centrin | no signal |
| ENSG00000215203 | ENST00000399770 | GRXCR1   | Diff. RPE1 GFP-Centrin | no signal |
| ENSG00000177602 | ENST00000325418 | GSG2     | Diff. RPE1 GFP-Centrin | no signal |
| ENSG00000092036 | ENST00000342454 | HAUS4    | Diff. RPE1 GFP-Centrin | no signal |
| ENSG00000131351 | ENST00000253669 | HAUS8    | Diff. RPE1 GFP-Centrin | no signal |
| ENSG00000131351 | ENST00000253669 | HAUS8    | Diff. RPE1 GFP-Centrin | no signal |
| ENSG00000188175 | ENST00000394468 | HEPACAM2 | Diff. RPE1 GFP-Centrin | no signal |
| ENSG00000188175 | ENST00000341723 | HEPACAM2 | Diff. RPE1 GFP-Centrin | no signal |
| ENSG00000134709 | ENST00000371208 | HOOK1    | Diff. RPE1 GFP-Centrin | no signal |
| ENSG00000158748 | ENST00000289753 | HTR6     | Diff. RPE1 GFP-Centrin | no signal |
| ENSG00000157423 | ENST00000393567 | HYDIN    | Diff. RPE1 GFP-Centrin | no signal |
| ENSG00000130294 | ENST00000648680 | KIF1A    | Diff. RPE1 GFP-Centrin | no signal |
| ENSG00000125337 | ENST00000351261 | KIF25    | Diff. RPE1 GFP-Centrin | no signal |
| ENSG00000182866 | ENST00000336890 | LCK      | Diff. RPE1 GFP-Centrin | no signal |
| ENSG00000172264 | ENST00000402914 | MACROD2  | Diff. RPE1 GFP-Centrin | no signal |
| ENSG00000111837 | ENST00000313243 | MAK      | Diff. RPE1 GFP-Centrin | no signal |
| ENSG00000111837 | ENST00000313243 | MAK      | Diff. RPE1 GFP-Centrin | no signal |
| ENSG00000212916 | ENST00000418460 | MAP10    | Diff. RPE1 GFP-Centrin | no signal |
| ENSG00000212916 | ENST00000418460 | MAP10    | Diff. RPE1 GFP-Centrin | no signal |
| ENSG00000173327 | ENST00000309100 | MAP3K11  | Diff. RPE1 GFP-Centrin | no signal |
| ENSG00000180834 | ENST00000318631 | MAP6D1   | Diff. RPE1 GFP-Centrin | no signal |
| ENSG00000163875 | ENST00000373075 | MEAF6    | Diff. RPE1 GFP-Centrin | no signal |
| ENSG00000163875 | ENST00000373075 | MEAF6    | Diff. RPE1 GFP-Centrin | no signal |
| ENSG00000243156 | ENST00000441493 | MICAL3   | Diff. RPE1 GFP-Centrin | no signal |
| ENSG00000158411 | ENST00000289359 | MITD1    | Diff. RPE1 GFP-Centrin | no signal |
| ENSG00000034971 | ENST00000037502 | MYOC     | Diff. RPE1 GFP-Centrin | no signal |
| ENSG00000166579 | ENST00000402554 | NDEL1    | Diff. RPE1 GFP-Centrin | no signal |
| ENSG00000136098 | ENST00000610828 | NEK3     | Diff. RPE1 GFP-Centrin | no signal |
| ENSG00000101004 | ENST00000278886 | NINL     | Diff. RPE1 GFP-Centrin | no signal |
| ENSG00000144061 | ENST00000445609 | NPHP1    | Diff. RPE1 GFP-Centrin | no signal |
| ENSG00000112530 | ENST00000366888 | PACRG    | Diff. RPE1 GFP-Centrin | no signal |
| ENSG00000075891 | ENST00000355243 | PAX2     | Diff. RPE1 GFP-Centrin | no signal |
| ENSG00000075891 | ENST00000355243 | PAX2     | Diff. RPE1 GFP-Centrin | no signal |

|                 |                 |          |                        |             |
|-----------------|-----------------|----------|------------------------|-------------|
| ENSG00000116703 | ENST00000340129 | PDC      | Diff. RPE1 GFP-Centrin | no signal   |
| ENSG00000184588 | ENST00000371045 | PDE4B    | Diff. RPE1 GFP-Centrin | no signal   |
| ENSG00000158683 | ENST00000289672 | PKD1L1   | Diff. RPE1 GFP-Centrin | no signal   |
| ENSG00000170927 | ENST00000340994 | PKHD1    | Diff. RPE1 GFP-Centrin | no signal   |
| ENSG00000170927 | ENST00000371117 | PKHD1    | Diff. RPE1 GFP-Centrin | no signal   |
| ENSG00000170927 | ENST00000371117 | PKHD1    | Diff. RPE1 GFP-Centrin | no signal   |
| ENSG00000205038 | ENST00000378402 | PKHD1L1  | Diff. RPE1 GFP-Centrin | no signal   |
| ENSG00000100078 | ENST00000215885 | PLA2G3   | Diff. RPE1 GFP-Centrin | no signal   |
| ENSG00000178125 | ENST00000324682 | PPP1R42  | Diff. RPE1 GFP-Centrin | no signal   |
| ENSG00000070950 | ENST00000264926 | RAD18    | Diff. RPE1 GFP-Centrin | no signal   |
| ENSG00000164188 | ENST00000296604 | RANBP3L  | Diff. RPE1 GFP-Centrin | no signal   |
| ENSG00000165917 | ENST00000298854 | RAPSN    | Diff. RPE1 GFP-Centrin | no signal   |
| ENSG00000102760 | ENST00000379359 | RGCC     | Diff. RPE1 GFP-Centrin | no signal   |
| ENSG00000169220 | ENST00000408923 | RGS14    | Diff. RPE1 GFP-Centrin | no signal   |
| ENSG00000104237 | ENST00000220676 | RP1      | Diff. RPE1 GFP-Centrin | no signal   |
| ENSG00000102218 | ENST00000218340 | RP2      | Diff. RPE1 GFP-Centrin | no signal   |
| ENSG00000092200 | ENST00000400017 | RPGRIP1  | Diff. RPE1 GFP-Centrin | no signal   |
| ENSG00000025039 | ENST00000369415 | RRAGD    | Diff. RPE1 GFP-Centrin | no signal   |
| ENSG00000160188 | ENST00000291536 | RSPH1    | Diff. RPE1 GFP-Centrin | no signal   |
| ENSG00000111834 | ENST00000229554 | RSPH4A   | Diff. RPE1 GFP-Centrin | no signal   |
| ENSG00000165480 | ENST00000462482 | SKA3     | Diff. RPE1 GFP-Centrin | no signal   |
| ENSG00000188817 | ENST00000343837 | SNTN     | Diff. RPE1 GFP-Centrin | no signal   |
| ENSG00000086300 | ENST00000338523 | SNX10    | Diff. RPE1 GFP-Centrin | no signal   |
| ENSG00000095637 | ENST00000306402 | SORBS1   | Diff. RPE1 GFP-Centrin | no signal   |
| ENSG00000155761 | ENST00000336338 | SPAG17   | Diff. RPE1 GFP-Centrin | no signal   |
| ENSG00000123473 | ENST00000371877 | STIL     | Diff. RPE1 GFP-Centrin | no signal   |
| ENSG00000165730 | ENST00000421961 | STOX1    | Diff. RPE1 GFP-Centrin | no signal   |
| ENSG00000147642 | ENST00000276646 | SYBU     | Diff. RPE1 GFP-Centrin | no signal   |
| ENSG00000111490 | ENST00000229088 | TBC1D30  | Diff. RPE1 GFP-Centrin | no signal   |
| ENSG00000184786 | ENST00000366774 | TCTE3    | Diff. RPE1 GFP-Centrin | no signal   |
| ENSG00000167858 | ENST00000338694 | TEKT1    | Diff. RPE1 GFP-Centrin | no signal   |
| ENSG00000092850 | ENST00000207457 | TEKT2    | Diff. RPE1 GFP-Centrin | no signal   |
| ENSG00000125409 | ENST00000395930 | TEKT3    | Diff. RPE1 GFP-Centrin | no signal   |
| ENSG00000153060 | ENST00000283025 | TEKT5    | Diff. RPE1 GFP-Centrin | no signal   |
| ENSG00000187049 | ENST00000334888 | TMEM216  | Diff. RPE1 GFP-Centrin | no signal   |
| ENSG00000138100 | ENST00000380075 | TRIM54   | Diff. RPE1 GFP-Centrin | no signal   |
| ENSG00000111199 | ENST00000261740 | TRPV4    | Diff. RPE1 GFP-Centrin | no signal   |
| ENSG00000126467 | ENST00000246801 | TSKS     | Diff. RPE1 GFP-Centrin | no signal   |
| ENSG00000131044 | ENST00000375921 | TTL9     | Diff. RPE1 GFP-Centrin | no signal   |
| ENSG00000178462 | ENST00000380419 | TUBAL3   | Diff. RPE1 GFP-Centrin | no signal   |
| ENSG00000104804 | ENST00000221399 | TULP2    | Diff. RPE1 GFP-Centrin | no signal   |
| ENSG00000162543 | ENST00000375099 | UBXN10   | Diff. RPE1 GFP-Centrin | no signal   |
| ENSG00000075702 | ENST00000401500 | WDR62    | Diff. RPE1 GFP-Centrin | no signal   |
| ENSG00000143156 | ENST00000367811 | NME7     | Diff. RPE1 GFP-Centrin | nuclear     |
| ENSG00000151475 | ENST00000281154 | SLC25A31 | Diff. RPE1 GFP-Centrin | nuclear     |
| ENSG00000214021 | ENST00000383827 | TTL3     | Diff. RPE1 GFP-Centrin | nuclear     |
| ENSG00000122257 | ENST00000319715 | RBBP6    | Diff. RPE1 GFP-Centrin | perinuclear |
| ENSG00000117394 | ENST00000426263 | SLC2A1   | Diff. RPE1 GFP-Centrin | Perinuclear |
| ENSG00000169504 | ENST00000374379 | CLIC4    | Diff. RPE1 GFP-Centrin | Polarized   |
| ENSG00000141367 | ENST00000621829 | CLTC     | Diff. RPE1 GFP-Centrin | Polarized   |
| ENSG00000109861 | ENST00000227266 | CTSC     | Diff. RPE1 GFP-Centrin | Polarized   |
| ENSG00000044574 | ENST00000324460 | HSPA5    | Diff. RPE1 GFP-Centrin | Polarized   |
| ENSG00000111057 | ENST00000388835 | KRT18    | Diff. RPE1 GFP-Centrin | Polarized   |

|                 |                 |          |                        |                 |
|-----------------|-----------------|----------|------------------------|-----------------|
| ENSG00000168036 | ENST00000349496 | CTNNB1   | Diff. RPE1 GFP-Centrin | Polarized, Foci |
| ENSG00000170004 | ENST00000330494 | CHD3     | Diff. RPE1 GFP-Centrin | Protrusion      |
| ENSG00000129250 | ENST00000320785 | KIF1C    | Diff. RPE1 GFP-Centrin | Protrusion      |
| ENSG00000170759 | ENST00000302418 | KIF5B    | Diff. RPE1 GFP-Centrin | Protrusion      |
| ENSG00000094914 | ENST00000209873 | AAAS     | Diff. RPE1 GFP-Centrin | Random          |
| ENSG00000275700 | ENST00000619387 | AATF     | Diff. RPE1 GFP-Centrin | Random          |
| ENSG00000165660 | ENST00000298492 | ABRAXAS2 | Diff. RPE1 GFP-Centrin | Random          |
| ENSG00000165660 | ENST00000298492 | ABRAXAS2 | Diff. RPE1 GFP-Centrin | Random          |
| ENSG00000113812 | ENST00000335754 | ACTR8    | Diff. RPE1 GFP-Centrin | Random          |
| ENSG00000113812 | ENST00000335754 | ACTR8    | Diff. RPE1 GFP-Centrin | Random          |
| ENSG00000084693 | ENST00000323064 | AGBL5    | Diff. RPE1 GFP-Centrin | Random          |
| ENSG00000135541 | ENST00000367800 | AHI1     | Diff. RPE1 GFP-Centrin | Random          |
| ENSG00000105127 | ENST00000269701 | AKAP8    | Diff. RPE1 GFP-Centrin | Random          |
| ENSG00000106948 | ENST00000374088 | AKNA     | Diff. RPE1 GFP-Centrin | Random          |
| ENSG00000106524 | ENST00000306999 | ANKMY2   | Diff. RPE1 GFP-Centrin | Random          |
| ENSG00000107890 | ENST00000376070 | ANKRD26  | Diff. RPE1 GFP-Centrin | Random          |
| ENSG00000165138 | ENST00000353234 | ANKS6    | Diff. RPE1 GFP-Centrin | Random          |
| ENSG00000135046 | ENST00000257497 | ANXA1    | Diff. RPE1 GFP-Centrin | Random          |
| ENSG00000122359 | ENST00000422982 | ANXA11   | Diff. RPE1 GFP-Centrin | Random          |
| ENSG00000182718 | ENST00000451270 | ANXA2    | Diff. RPE1 GFP-Centrin | Random          |
| ENSG00000134982 | ENST00000257430 | APC      | Diff. RPE1 GFP-Centrin | Random          |
| ENSG00000134982 | ENST00000257430 | APC      | Diff. RPE1 GFP-Centrin | Random          |
| ENSG00000100823 | ENST00000216714 | APEX1    | Diff. RPE1 GFP-Centrin | Random          |
| ENSG00000062725 | ENST00000083182 | APPBP2   | Diff. RPE1 GFP-Centrin | Random          |
| ENSG00000104728 | ENST00000518288 | ARHGEF10 | Diff. RPE1 GFP-Centrin | Random          |
| ENSG00000169379 | ENST00000335438 | ARL13B   | Diff. RPE1 GFP-Centrin | Random          |
| ENSG00000213465 | ENST00000246747 | ARL2     | Diff. RPE1 GFP-Centrin | Random          |
| ENSG00000102931 | ENST00000219204 | ARL2BP   | Diff. RPE1 GFP-Centrin | Random          |
| ENSG00000138175 | ENST00000260746 | ARL3     | Diff. RPE1 GFP-Centrin | Random          |
| ENSG00000113966 | ENST00000463745 | ARL6     | Diff. RPE1 GFP-Centrin | Random          |
| ENSG00000143862 | ENST00000272217 | ARL8A    | Diff. RPE1 GFP-Centrin | Random          |
| ENSG00000128272 | ENST00000396680 | ATF4     | Diff. RPE1 GFP-Centrin | Random          |
| ENSG00000169136 | ENST00000423777 | ATF5     | Diff. RPE1 GFP-Centrin | Random          |
| ENSG00000169136 | ENST00000423777 | ATF5     | Diff. RPE1 GFP-Centrin | Random          |
| ENSG00000159720 | ENST00000290949 | ATP6V0D1 | Diff. RPE1 GFP-Centrin | Random          |
| ENSG00000100554 | ENST00000216442 | ATP6V1D  | Diff. RPE1 GFP-Centrin | Random          |
| ENSG00000127423 | ENST00000374298 | AUNIP    | Diff. RPE1 GFP-Centrin | Random          |
| ENSG00000178999 | ENST00000534871 | AURKB    | Diff. RPE1 GFP-Centrin | Random          |
| ENSG00000168646 | ENST00000307078 | AXIN2    | Diff. RPE1 GFP-Centrin | Random          |
| ENSG00000108641 | ENST00000261499 | B9D1     | Diff. RPE1 GFP-Centrin | Random          |
| ENSG00000123810 | ENST00000243578 | B9D2     | Diff. RPE1 GFP-Centrin | Random          |
| ENSG00000175866 | ENST00000428708 | BAIAP2   | Diff. RPE1 GFP-Centrin | Random          |
| ENSG00000009954 | ENST00000339594 | BAZ1B    | Diff. RPE1 GFP-Centrin | Random          |
| ENSG00000119636 | ENST00000394009 | BBOF1    | Diff. RPE1 GFP-Centrin | Random          |
| ENSG00000174483 | ENST00000318312 | BBS1     | Diff. RPE1 GFP-Centrin | Random          |
| ENSG00000179941 | ENST00000393262 | BBS10    | Diff. RPE1 GFP-Centrin | Random          |
| ENSG00000181004 | ENST00000314218 | BBS12    | Diff. RPE1 GFP-Centrin | Random          |
| ENSG00000125124 | ENST00000245157 | BBS2     | Diff. RPE1 GFP-Centrin | Random          |
| ENSG00000140463 | ENST00000268057 | BBS4     | Diff. RPE1 GFP-Centrin | Random          |
| ENSG00000140463 | ENST00000268057 | BBS4     | Diff. RPE1 GFP-Centrin | Random          |
| ENSG00000163093 | ENST00000295240 | BBS5     | Diff. RPE1 GFP-Centrin | Random          |
| ENSG00000138686 | ENST00000264499 | BBS7     | Diff. RPE1 GFP-Centrin | Random          |
| ENSG00000122507 | ENST00000242067 | BBS9     | Diff. RPE1 GFP-Centrin | Random          |

|                 |                 |          |                        |        |
|-----------------|-----------------|----------|------------------------|--------|
| ENSG00000116752 | ENST00000369541 | BCAS2    | Diff. RPE1 GFP-Centrin | Random |
| ENSG00000116752 | ENST00000369541 | BCAS2    | Diff. RPE1 GFP-Centrin | Random |
| ENSG00000107949 | ENST00000278100 | BCCIP    | Diff. RPE1 GFP-Centrin | Random |
| ENSG00000069399 | ENST00000164227 | BCL3     | Diff. RPE1 GFP-Centrin | Random |
| ENSG00000115760 | ENST00000421745 | BIRC6    | Diff. RPE1 GFP-Centrin | Random |
| ENSG00000145919 | ENST00000311086 | BOD1     | Diff. RPE1 GFP-Centrin | Random |
| ENSG00000169679 | ENST00000535254 | BUB1     | Diff. RPE1 GFP-Centrin | Random |
| ENSG00000156970 | ENST00000287598 | BUB1B    | Diff. RPE1 GFP-Centrin | Random |
| ENSG00000154473 | ENST00000368858 | BUB3     | Diff. RPE1 GFP-Centrin | Random |
| ENSG00000265590 | ENST00000673807 | C21ORF59 | Diff. RPE1 GFP-Centrin | Random |
| ENSG00000198663 | ENST00000480824 | C6ORF89  | Diff. RPE1 GFP-Centrin | Random |
| ENSG00000153790 | ENST00000283905 | C7ORF31  | Diff. RPE1 GFP-Centrin | Random |
| ENSG00000183346 | ENST00000330194 | CABCOCO1 | Diff. RPE1 GFP-Centrin | Random |
| ENSG00000154040 | ENST00000327201 | CABYR    | Diff. RPE1 GFP-Centrin | Random |
| ENSG00000163888 | ENST00000296238 | CAMK2N2  | Diff. RPE1 GFP-Centrin | Random |
| ENSG00000130559 | ENST00000389532 | CAMSAP1  | Diff. RPE1 GFP-Centrin | Random |
| ENSG00000118200 | ENST00000358823 | CAMSAP2  | Diff. RPE1 GFP-Centrin | Random |
| ENSG00000175294 | ENST00000312106 | CATSPER1 | Diff. RPE1 GFP-Centrin | Random |
| ENSG00000105974 | ENST00000405348 | CAV1     | Diff. RPE1 GFP-Centrin | Random |
| ENSG00000007080 | ENST00000445755 | CCDC124  | Diff. RPE1 GFP-Centrin | Random |
| ENSG00000175455 | ENST00000310351 | CCDC14   | Diff. RPE1 GFP-Centrin | Random |
| ENSG00000149548 | ENST00000344762 | CCDC15   | Diff. RPE1 GFP-Centrin | Random |
| ENSG00000119242 | ENST00000238156 | CCDC92   | Diff. RPE1 GFP-Centrin | Random |
| ENSG00000204536 | ENST00000376266 | CCHCR1   | Diff. RPE1 GFP-Centrin | Random |
| ENSG00000162063 | ENST00000397066 | CCNF     | Diff. RPE1 GFP-Centrin | Random |
| ENSG00000103540 | ENST00000396208 | CCP110   | Diff. RPE1 GFP-Centrin | Random |
| ENSG00000103540 | ENST00000396208 | CCP110   | Diff. RPE1 GFP-Centrin | Random |
| ENSG00000154429 | ENST00000284617 | CCSAP    | Diff. RPE1 GFP-Centrin | Random |
| ENSG00000163468 | ENST00000295688 | CCT3     | Diff. RPE1 GFP-Centrin | Random |
| ENSG00000115484 | ENST00000544079 | CCT4     | Diff. RPE1 GFP-Centrin | Random |
| ENSG00000150753 | ENST00000280326 | CCT5     | Diff. RPE1 GFP-Centrin | Random |
| ENSG00000150753 | ENST00000503026 | CCT5     | Diff. RPE1 GFP-Centrin | Random |
| ENSG00000146731 | ENST00000275603 | CCT6A    | Diff. RPE1 GFP-Centrin | Random |
| ENSG00000135624 | ENST00000258091 | CCT7     | Diff. RPE1 GFP-Centrin | Random |
| ENSG00000156261 | ENST00000286788 | CCT8     | Diff. RPE1 GFP-Centrin | Random |
| ENSG00000079335 | ENST00000336454 | CDC14A   | Diff. RPE1 GFP-Centrin | Random |
| ENSG00000079335 | ENST00000361544 | CDC14A   | Diff. RPE1 GFP-Centrin | Random |
| ENSG00000081377 | ENST00000412285 | CDC14B   | Diff. RPE1 GFP-Centrin | Random |
| ENSG00000130177 | ENST00000356221 | CDC16    | Diff. RPE1 GFP-Centrin | Random |
| ENSG00000130177 | ENST00000360383 | CDC16    | Diff. RPE1 GFP-Centrin | Random |
| ENSG00000130177 | ENST00000360383 | CDC16    | Diff. RPE1 GFP-Centrin | Random |
| ENSG00000117399 | ENST00000310955 | CDC20    | Diff. RPE1 GFP-Centrin | Random |
| ENSG00000117399 | ENST00000310955 | CDC20    | Diff. RPE1 GFP-Centrin | Random |
| ENSG00000004897 | ENST00000531206 | CDC27    | Diff. RPE1 GFP-Centrin | Random |
| ENSG00000070831 | ENST00000400259 | CDC42    | Diff. RPE1 GFP-Centrin | Random |
| ENSG00000097046 | ENST00000234626 | CDC7     | Diff. RPE1 GFP-Centrin | Random |
| ENSG00000134690 | ENST00000327331 | CDCA8    | Diff. RPE1 GFP-Centrin | Random |
| ENSG00000156345 | ENST00000375871 | CDK20    | Diff. RPE1 GFP-Centrin | Random |
| ENSG00000167797 | ENST00000301488 | CDK2AP2  | Diff. RPE1 GFP-Centrin | Random |
| ENSG00000164885 | ENST00000485972 | CDK5     | Diff. RPE1 GFP-Centrin | Random |
| ENSG00000108465 | ENST00000338399 | CDK5RAP3 | Diff. RPE1 GFP-Centrin | Random |
| ENSG00000105810 | ENST00000265734 | CDK6     | Diff. RPE1 GFP-Centrin | Random |
| ENSG00000115163 | ENST00000335756 | CENPA    | Diff. RPE1 GFP-Centrin | Random |

|                 |                 |         |                        |        |
|-----------------|-----------------|---------|------------------------|--------|
| ENSG00000138778 | ENST00000380026 | CENPE   | Diff. RPE1 GFP-Centrin | Random |
| ENSG00000151849 | ENST00000381884 | CENPJ   | Diff. RPE1 GFP-Centrin | Random |
| ENSG00000138092 | ENST00000473706 | CENPO   | Diff. RPE1 GFP-Centrin | Random |
| ENSG00000175279 | ENST00000477755 | CENPS   | Diff. RPE1 GFP-Centrin | Random |
| ENSG00000166582 | ENST00000299736 | CENPV   | Diff. RPE1 GFP-Centrin | Random |
| ENSG00000203760 | ENST00000368328 | CENPW   | Diff. RPE1 GFP-Centrin | Random |
| ENSG00000169689 | ENST00000392359 | CENPX   | Diff. RPE1 GFP-Centrin | Random |
| ENSG00000116198 | ENST00000378230 | CEP104  | Diff. RPE1 GFP-Centrin | Random |
| ENSG00000154240 | ENST00000535342 | CEP112  | Diff. RPE1 GFP-Centrin | Random |
| ENSG00000168944 | ENST00000306481 | CEP120  | Diff. RPE1 GFP-Centrin | Random |
| ENSG00000135315 | ENST00000403245 | CEP162  | Diff. RPE1 GFP-Centrin | Random |
| ENSG00000135315 | ENST00000403245 | CEP162  | Diff. RPE1 GFP-Centrin | Random |
| ENSG00000143702 | ENST00000366542 | CEP170  | Diff. RPE1 GFP-Centrin | Random |
| ENSG00000099814 | ENST00000556508 | CEP170B | Diff. RPE1 GFP-Centrin | Random |
| ENSG00000174007 | ENST00000409690 | CEP19   | Diff. RPE1 GFP-Centrin | Random |
| ENSG00000164118 | ENST00000296519 | CEP44   | Diff. RPE1 GFP-Centrin | Random |
| ENSG00000182923 | ENST00000332047 | CEP63   | Diff. RPE1 GFP-Centrin | Random |
| ENSG00000011523 | ENST00000377990 | CEP68   | Diff. RPE1 GFP-Centrin | Random |
| ENSG00000173588 | ENST00000339839 | CEP83   | Diff. RPE1 GFP-Centrin | Random |
| ENSG00000130695 | ENST00000252992 | CEP85   | Diff. RPE1 GFP-Centrin | Random |
| ENSG00000121289 | ENST00000305768 | CEP89   | Diff. RPE1 GFP-Centrin | Random |
| ENSG00000177143 | ENST00000327228 | CETN1   | Diff. RPE1 GFP-Centrin | Random |
| ENSG00000147400 | ENST00000370277 | CETN2   | Diff. RPE1 GFP-Centrin | Random |
| ENSG00000188596 | ENST00000524981 | CFAP54  | Diff. RPE1 GFP-Centrin | Random |
| ENSG00000120051 | ENST00000369704 | CFAP58  | Diff. RPE1 GFP-Centrin | Random |
| ENSG00000153774 | ENST00000283882 | CFDP1   | Diff. RPE1 GFP-Centrin | Random |
| ENSG00000254505 | ENST00000347519 | CHMP4A  | Diff. RPE1 GFP-Centrin | Random |
| ENSG00000101421 | ENST00000217402 | CHMP4B  | Diff. RPE1 GFP-Centrin | Random |
| ENSG00000110172 | ENST00000320585 | CHORDC1 | Diff. RPE1 GFP-Centrin | Random |
| ENSG00000110172 | ENST00000457199 | CHORDC1 | Diff. RPE1 GFP-Centrin | Random |
| ENSG00000138433 | ENST00000342016 | CIR1    | Diff. RPE1 GFP-Centrin | Random |
| ENSG00000136108 | ENST00000378037 | CKAP2   | Diff. RPE1 GFP-Centrin | Random |
| ENSG00000130779 | ENST00000620786 | CLIP1   | Diff. RPE1 GFP-Centrin | Random |
| ENSG00000106665 | ENST00000361545 | CLIP2   | Diff. RPE1 GFP-Centrin | Random |
| ENSG00000070371 | ENST00000442042 | CLTCL1  | Diff. RPE1 GFP-Centrin | Random |
| ENSG00000103351 | ENST00000417763 | CLUAP1  | Diff. RPE1 GFP-Centrin | Random |
| ENSG00000044459 | ENST00000380647 | CNTLN   | Diff. RPE1 GFP-Centrin | Random |
| ENSG00000170037 | ENST00000563694 | CNTROB  | Diff. RPE1 GFP-Centrin | Random |
| ENSG00000099942 | ENST00000354336 | CRKL    | Diff. RPE1 GFP-Centrin | Random |
| ENSG00000113712 | ENST00000261798 | CSNK1A1 | Diff. RPE1 GFP-Centrin | Random |
| ENSG00000113712 | ENST00000377843 | CSNK1A1 | Diff. RPE1 GFP-Centrin | Random |
| ENSG00000204435 | ENST00000375882 | CSNK2B  | Diff. RPE1 GFP-Centrin | Random |
| ENSG00000104218 | ENST00000262210 | CSPP1   | Diff. RPE1 GFP-Centrin | Random |
| ENSG00000060069 | ENST00000613122 | CTDP1   | Diff. RPE1 GFP-Centrin | Random |
| ENSG00000198561 | ENST00000526772 | CTNND1  | Diff. RPE1 GFP-Centrin | Random |
| ENSG00000044090 | ENST00000265348 | CUL7    | Diff. RPE1 GFP-Centrin | Random |
| ENSG00000044090 | ENST00000535468 | CUL7    | Diff. RPE1 GFP-Centrin | Random |
| ENSG00000205795 | ENST00000381813 | CYS1    | Diff. RPE1 GFP-Centrin | Random |
| ENSG00000123977 | ENST00000309931 | DAW1    | Diff. RPE1 GFP-Centrin | Random |
| ENSG00000198876 | ENST00000361264 | DCAF12  | Diff. RPE1 GFP-Centrin | Random |
| ENSG00000164934 | ENST00000297579 | DCAF13  | Diff. RPE1 GFP-Centrin | Random |
| ENSG00000164934 | ENST00000297579 | DCAF13  | Diff. RPE1 GFP-Centrin | Random |
| ENSG00000118655 | ENST00000369563 | DCLRE1B | Diff. RPE1 GFP-Centrin | Random |
| ENSG00000137100 | ENST00000259632 | DCTN3   | Diff. RPE1 GFP-Centrin | Random |

|                 |                 |           |                        |        |
|-----------------|-----------------|-----------|------------------------|--------|
| ENSG00000132912 | ENST00000447998 | DCTN4     | Diff. RPE1 GFP-Centrin | Random |
| ENSG00000104671 | ENST00000221114 | DCTN6     | Diff. RPE1 GFP-Centrin | Random |
| ENSG00000135829 | ENST00000367549 | DHX9      | Diff. RPE1 GFP-Centrin | Random |
| ENSG00000091140 | ENST00000440410 | DLD       | Diff. RPE1 GFP-Centrin | Random |
| ENSG00000075711 | ENST00000357674 | DLG1      | Diff. RPE1 GFP-Centrin | Random |
| ENSG00000256061 | ENST00000457155 | DNAAF4    | Diff. RPE1 GFP-Centrin | Random |
| ENSG00000100246 | ENST00000216068 | DNAL4     | Diff. RPE1 GFP-Centrin | Random |
| ENSG00000106976 | ENST00000372923 | DNM1      | Diff. RPE1 GFP-Centrin | Random |
| ENSG00000087470 | ENST00000452533 | DNM1L     | Diff. RPE1 GFP-Centrin | Random |
| ENSG00000133884 | ENST00000252268 | DPF2      | Diff. RPE1 GFP-Centrin | Random |
| ENSG00000092964 | ENST00000311151 | DPYSL2    | Diff. RPE1 GFP-Centrin | Random |
| ENSG00000185721 | ENST00000331457 | DRG1      | Diff. RPE1 GFP-Centrin | Random |
| ENSG00000143476 | ENST00000366991 | DTL       | Diff. RPE1 GFP-Centrin | Random |
| ENSG00000107404 | ENST00000378891 | DVL1      | Diff. RPE1 GFP-Centrin | Random |
| ENSG00000144635 | ENST00000273130 | DYNC1LI1  | Diff. RPE1 GFP-Centrin | Random |
| ENSG00000135720 | ENST00000258198 | DYNC1LI2  | Diff. RPE1 GFP-Centrin | Random |
| ENSG00000138036 | ENST00000260605 | DYNC2LI1  | Diff. RPE1 GFP-Centrin | Random |
| ENSG00000264364 | ENST00000579991 | DYNLL2    | Diff. RPE1 GFP-Centrin | Random |
| ENSG00000125971 | ENST00000357156 | DYNLRB1   | Diff. RPE1 GFP-Centrin | Random |
| ENSG00000165169 | ENST00000378578 | DYNLT3    | Diff. RPE1 GFP-Centrin | Random |
| ENSG00000134874 | ENST00000361396 | DZIP1     | Diff. RPE1 GFP-Centrin | Random |
| ENSG00000158163 | ENST00000327532 | DZIP1L    | Diff. RPE1 GFP-Centrin | Random |
| ENSG00000101412 | ENST00000343380 | E2F1      | Diff. RPE1 GFP-Centrin | Random |
| ENSG00000136813 | ENST00000259335 | ECPAS     | Diff. RPE1 GFP-Centrin | Random |
| ENSG00000203965 | ENST00000371088 | EFCAB7    | Diff. RPE1 GFP-Centrin | Random |
| ENSG00000096093 | ENST00000371068 | EFHC1     | Diff. RPE1 GFP-Centrin | Random |
| ENSG00000013016 | ENST00000322054 | EHD3      | Diff. RPE1 GFP-Centrin | Random |
| ENSG00000102119 | ENST00000369842 | EMD       | Diff. RPE1 GFP-Centrin | Random |
| ENSG00000125746 | ENST00000245925 | EML2      | Diff. RPE1 GFP-Centrin | Random |
| ENSG00000186871 | ENST00000334463 | ERCC6L    | Diff. RPE1 GFP-Centrin | Random |
| ENSG00000186871 | ENST00000334463 | ERCC6L    | Diff. RPE1 GFP-Centrin | Random |
| ENSG00000100632 | ENST00000557016 | ERH       | Diff. RPE1 GFP-Centrin | Random |
| ENSG00000135476 | ENST00000257934 | ESPL1     | Diff. RPE1 GFP-Centrin | Random |
| ENSG00000072840 | ENST00000382674 | EVC       | Diff. RPE1 GFP-Centrin | Random |
| ENSG00000180104 | ENST00000512944 | EXOC3     | Diff. RPE1 GFP-Centrin | Random |
| ENSG00000158161 | ENST00000436342 | EYA3      | Diff. RPE1 GFP-Centrin | Random |
| ENSG00000158161 | ENST00000436342 | EYA3      | Diff. RPE1 GFP-Centrin | Random |
| ENSG00000170264 | ENST00000405894 | FAM161A   | Diff. RPE1 GFP-Centrin | Random |
| ENSG00000153310 | ENST00000517654 | FAM49B    | Diff. RPE1 GFP-Centrin | Random |
| ENSG00000143756 | ENST00000366862 | FBXO28    | Diff. RPE1 GFP-Centrin | Random |
| ENSG00000103264 | ENST00000565593 | FBXO31    | Diff. RPE1 GFP-Centrin | Random |
| ENSG00000149557 | ENST00000278919 | FEZ1      | Diff. RPE1 GFP-Centrin | Random |
| ENSG00000004478 | ENST00000001008 | FKBP4     | Diff. RPE1 GFP-Centrin | Random |
| ENSG00000154803 | ENST00000285071 | FLCN      | Diff. RPE1 GFP-Centrin | Random |
| ENSG00000154803 | ENST00000285071 | FLCN      | Diff. RPE1 GFP-Centrin | Random |
| ENSG00000133393 | ENST00000255759 | FOPNL     | Diff. RPE1 GFP-Centrin | Random |
| ENSG00000163820 | ENST00000296137 | FYCO1     | Diff. RPE1 GFP-Centrin | Random |
| ENSG00000163820 | ENST00000433878 | FYCO1     | Diff. RPE1 GFP-Centrin | Random |
| ENSG00000139112 | ENST00000266458 | GABARAPL1 | Diff. RPE1 GFP-Centrin | Random |
| ENSG00000141013 | ENST00000268699 | GAS8      | Diff. RPE1 GFP-Centrin | Random |
| ENSG00000178295 | ENST00000381254 | GEN1      | Diff. RPE1 GFP-Centrin | Random |
| ENSG00000074047 | ENST00000361492 | GLI2      | Diff. RPE1 GFP-Centrin | Random |
| ENSG00000106571 | ENST00000395925 | GLI3      | Diff. RPE1 GFP-Centrin | Random |



|                 |                 |         |                        |        |
|-----------------|-----------------|---------|------------------------|--------|
| ENSG00000127955 | ENST00000351004 | GNAI1   | Diff. RPE1 GFP-Centrin | Random |
| ENSG00000127955 | ENST00000351004 | GNAI1   | Diff. RPE1 GFP-Centrin | Random |
| ENSG00000114353 | ENST00000266027 | GNAI2   | Diff. RPE1 GFP-Centrin | Random |
| ENSG00000167110 | ENST00000421699 | GOLGA2  | Diff. RPE1 GFP-Centrin | Random |
| ENSG00000143147 | ENST00000271357 | GPR161  | Diff. RPE1 GFP-Centrin | Random |
| ENSG00000143147 | ENST00000271357 | GPR161  | Diff. RPE1 GFP-Centrin | Random |
| ENSG00000173020 | ENST00000308595 | GRK2    | Diff. RPE1 GFP-Centrin | Random |
| ENSG00000082701 | ENST00000264235 | GSK3B   | Diff. RPE1 GFP-Centrin | Random |
| ENSG00000188486 | ENST00000530167 | H2AFX   | Diff. RPE1 GFP-Centrin | Random |
| ENSG00000113648 | ENST00000312469 | H2AFY   | Diff. RPE1 GFP-Centrin | Random |
| ENSG00000177602 | ENST00000325418 | HASPIN  | Diff. RPE1 GFP-Centrin | Random |
| ENSG00000152240 | ENST00000282058 | HAUS1   | Diff. RPE1 GFP-Centrin | Random |
| ENSG00000214367 | ENST00000443786 | HAUS3   | Diff. RPE1 GFP-Centrin | Random |
| ENSG00000214367 | ENST00000443786 | HAUS3   | Diff. RPE1 GFP-Centrin | Random |
| ENSG00000092036 | ENST00000541587 | HAUS4   | Diff. RPE1 GFP-Centrin | Random |
| ENSG00000249115 | ENST00000203166 | HAUS5   | Diff. RPE1 GFP-Centrin | Random |
| ENSG00000147874 | ENST00000380502 | HAUS6   | Diff. RPE1 GFP-Centrin | Random |
| ENSG00000147874 | ENST00000380502 | HAUS6   | Diff. RPE1 GFP-Centrin | Random |
| ENSG00000213397 | ENST00000370211 | HAUS7   | Diff. RPE1 GFP-Centrin | Random |
| ENSG00000213397 | ENST00000370211 | HAUS7   | Diff. RPE1 GFP-Centrin | Random |
| ENSG00000128731 | ENST00000261609 | HERC2   | Diff. RPE1 GFP-Centrin | Random |
| ENSG00000156515 | ENST00000359426 | HK1     | Diff. RPE1 GFP-Centrin | Random |
| ENSG00000095066 | ENST00000264827 | HOOK2   | Diff. RPE1 GFP-Centrin | Random |
| ENSG00000168172 | ENST00000307602 | HOOK3   | Diff. RPE1 GFP-Centrin | Random |
| ENSG00000185122 | ENST00000528838 | HSF1    | Diff. RPE1 GFP-Centrin | Random |
| ENSG00000204389 | ENST00000375651 | HSPA1A  | Diff. RPE1 GFP-Centrin | Random |
| ENSG00000204388 | ENST00000375650 | HSPA1B  | Diff. RPE1 GFP-Centrin | Random |
| ENSG00000173110 | ENST00000309758 | HSPA6   | Diff. RPE1 GFP-Centrin | Random |
| ENSG00000081870 | ENST00000194214 | HSPB11  | Diff. RPE1 GFP-Centrin | Random |
| ENSG00000197386 | ENST00000355072 | HTT     | Diff. RPE1 GFP-Centrin | Random |
| ENSG00000112144 | ENST00000350082 | ICK     | Diff. RPE1 GFP-Centrin | Random |
| ENSG00000187535 | ENST00000426508 | IFT140  | Diff. RPE1 GFP-Centrin | Random |
| ENSG00000138002 | ENST00000260570 | IFT172  | Diff. RPE1 GFP-Centrin | Random |
| ENSG00000109083 | ENST00000395418 | IFT20   | Diff. RPE1 GFP-Centrin | Random |
| ENSG00000128581 | ENST00000315322 | IFT22   | Diff. RPE1 GFP-Centrin | Random |
| ENSG00000100360 | ENST00000433985 | IFT27   | Diff. RPE1 GFP-Centrin | Random |
| ENSG00000100360 | ENST00000433985 | IFT27   | Diff. RPE1 GFP-Centrin | Random |
| ENSG00000118096 | ENST00000264021 | IFT46   | Diff. RPE1 GFP-Centrin | Random |
| ENSG00000101052 | ENST00000373039 | IFT52   | Diff. RPE1 GFP-Centrin | Random |
| ENSG00000114446 | ENST00000264538 | IFT57   | Diff. RPE1 GFP-Centrin | Random |
| ENSG00000096872 | ENST00000380062 | IFT74   | Diff. RPE1 GFP-Centrin | Random |
| ENSG00000122970 | ENST00000552912 | IFT81   | Diff. RPE1 GFP-Centrin | Random |
| ENSG00000032742 | ENST00000351808 | IFT88   | Diff. RPE1 GFP-Centrin | Random |
| ENSG00000128908 | ENST00000361937 | INO80   | Diff. RPE1 GFP-Centrin | Random |
| ENSG00000148384 | ENST00000371712 | INPP5E  | Diff. RPE1 GFP-Centrin | Random |
| ENSG00000173226 | ENST00000310864 | IQCB1   | Diff. RPE1 GFP-Centrin | Random |
| ENSG00000106012 | ENST00000402050 | IQCE    | Diff. RPE1 GFP-Centrin | Random |
| ENSG00000106012 | ENST00000402050 | IQCE    | Diff. RPE1 GFP-Centrin | Random |
| ENSG00000114473 | ENST00000265239 | IQCG    | Diff. RPE1 GFP-Centrin | Random |
| ENSG00000140575 | ENST00000268182 | IQGAP1  | Diff. RPE1 GFP-Centrin | Random |
| ENSG00000142856 | ENST00000271002 | ITGB3BP | Diff. RPE1 GFP-Centrin | Random |
| ENSG00000143543 | ENST00000271843 | JTB     | Diff. RPE1 GFP-Centrin | Random |
| ENSG00000108773 | ENST00000225916 | KAT2A   | Diff. RPE1 GFP-Centrin | Random |

|                 |                 |          |                        |        |
|-----------------|-----------------|----------|------------------------|--------|
| ENSG00000103510 | ENST00000219797 | KAT8     | Diff. RPE1 GFP-Centrin | Random |
| ENSG00000186625 | ENST00000367411 | KATNA1   | Diff. RPE1 GFP-Centrin | Random |
| ENSG00000186625 | ENST00000367411 | KATNA1   | Diff. RPE1 GFP-Centrin | Random |
| ENSG00000102781 | ENST00000380615 | KATNAL1  | Diff. RPE1 GFP-Centrin | Random |
| ENSG00000140854 | ENST00000379661 | KATNB1   | Diff. RPE1 GFP-Centrin | Random |
| ENSG00000198920 | ENST00000361413 | KIAA0753 | Diff. RPE1 GFP-Centrin | Random |
| ENSG00000197892 | ENST00000524189 | KIF13B   | Diff. RPE1 GFP-Centrin | Random |
| ENSG00000197892 | ENST00000524189 | KIF13B   | Diff. RPE1 GFP-Centrin | Random |
| ENSG00000163808 | ENST00000326047 | KIF15    | Diff. RPE1 GFP-Centrin | Random |
| ENSG00000137807 | ENST00000260363 | KIF23    | Diff. RPE1 GFP-Centrin | Random |
| ENSG00000068796 | ENST00000381103 | KIF2A    | Diff. RPE1 GFP-Centrin | Random |
| ENSG00000068796 | ENST00000401507 | KIF2A    | Diff. RPE1 GFP-Centrin | Random |
| ENSG00000101350 | ENST00000375712 | KIF3B    | Diff. RPE1 GFP-Centrin | Random |
| ENSG00000101350 | ENST00000375712 | KIF3B    | Diff. RPE1 GFP-Centrin | Random |
| ENSG00000090889 | ENST00000374403 | KIF4A    | Diff. RPE1 GFP-Centrin | Random |
| ENSG00000166813 | ENST00000394412 | KIF7     | Diff. RPE1 GFP-Centrin | Random |
| ENSG00000075945 | ENST00000361580 | KIFAP3   | Diff. RPE1 GFP-Centrin | Random |
| ENSG00000137171 | ENST00000347162 | KLC4     | Diff. RPE1 GFP-Centrin | Random |
| ENSG00000003096 | ENST00000371882 | KLHL13   | Diff. RPE1 GFP-Centrin | Random |
| ENSG00000162413 | ENST00000377658 | KLHL21   | Diff. RPE1 GFP-Centrin | Random |
| ENSG00000162413 | ENST00000377658 | KLHL21   | Diff. RPE1 GFP-Centrin | Random |
| ENSG00000099910 | ENST00000328879 | KLHL22   | Diff. RPE1 GFP-Centrin | Random |
| ENSG00000198642 | ENST00000359039 | KLHL9    | Diff. RPE1 GFP-Centrin | Random |
| ENSG00000128944 | ENST00000608100 | KNSTRN   | Diff. RPE1 GFP-Centrin | Random |
| ENSG00000184445 | ENST00000333479 | KNTC1    | Diff. RPE1 GFP-Centrin | Random |
| ENSG00000135338 | ENST00000369846 | LCA5     | Diff. RPE1 GFP-Centrin | Random |
| ENSG00000166477 | ENST00000299601 | LEO1     | Diff. RPE1 GFP-Centrin | Random |
| ENSG00000169683 | ENST00000306688 | LRRC45   | Diff. RPE1 GFP-Centrin | Random |
| ENSG00000133739 | ENST00000360375 | LRRCC1   | Diff. RPE1 GFP-Centrin | Random |
| ENSG00000133739 | ENST00000360375 | LRRCC1   | Diff. RPE1 GFP-Centrin | Random |
| ENSG00000107816 | ENST00000370223 | LZTS2    | Diff. RPE1 GFP-Centrin | Random |
| ENSG00000107816 | ENST00000370223 | LZTS2    | Diff. RPE1 GFP-Centrin | Random |
| ENSG00000002822 | ENST00000399654 | MAD1L1   | Diff. RPE1 GFP-Centrin | Random |
| ENSG00000002822 | ENST00000399654 | MAD1L1   | Diff. RPE1 GFP-Centrin | Random |
| ENSG00000179632 | ENST00000322428 | MAF1     | Diff. RPE1 GFP-Centrin | Random |
| ENSG00000130479 | ENST00000324096 | MAP1S    | Diff. RPE1 GFP-Centrin | Random |
| ENSG00000126934 | ENST00000262948 | MAP2K2   | Diff. RPE1 GFP-Centrin | Random |
| ENSG00000047849 | ENST00000429422 | MAP4     | Diff. RPE1 GFP-Centrin | Random |
| ENSG00000101367 | ENST00000375571 | MAPRE1   | Diff. RPE1 GFP-Centrin | Random |
| ENSG00000166974 | ENST00000300249 | MAPRE2   | Diff. RPE1 GFP-Centrin | Random |
| ENSG00000084764 | ENST00000233121 | MAPRE3   | Diff. RPE1 GFP-Centrin | Random |
| ENSG00000007047 | ENST00000262891 | MARK4    | Diff. RPE1 GFP-Centrin | Random |
| ENSG00000152601 | ENST00000463374 | MBNL1    | Diff. RPE1 GFP-Centrin | Random |
| ENSG00000163875 | ENST00000296214 | MEAF6    | Diff. RPE1 GFP-Centrin | Random |
| ENSG00000169057 | ENST00000303391 | MECP2    | Diff. RPE1 GFP-Centrin | Random |
| ENSG00000184634 | ENST00000374080 | MED12    | Diff. RPE1 GFP-Centrin | Random |
| ENSG00000101752 | ENST00000261537 | MIB1     | Diff. RPE1 GFP-Centrin | Random |
| ENSG00000101871 | ENST00000317552 | MID1     | Diff. RPE1 GFP-Centrin | Random |
| ENSG00000125863 | ENST00000399054 | MKKS     | Diff. RPE1 GFP-Centrin | Random |
| ENSG00000011143 | ENST00000393119 | MKS1     | Diff. RPE1 GFP-Centrin | Random |
| ENSG00000011143 | ENST00000393119 | MKS1     | Diff. RPE1 GFP-Centrin | Random |
| ENSG00000076242 | ENST00000231790 | MLH1     | Diff. RPE1 GFP-Centrin | Random |
| ENSG00000168303 | ENST00000306984 | MPLKIP   | Diff. RPE1 GFP-Centrin | Random |

|                 |                 |         |                        |        |
|-----------------|-----------------|---------|------------------------|--------|
| ENSG00000172167 | ENST00000305949 | MTBP    | Diff. RPE1 GFP-Centrin | Random |
| ENSG00000133026 | ENST00000269243 | MYH10   | Diff. RPE1 GFP-Centrin | Random |
| ENSG00000204899 | ENST00000377818 | MZT1    | Diff. RPE1 GFP-Centrin | Random |
| ENSG00000135372 | ENST00000257829 | NAT10   | Diff. RPE1 GFP-Centrin | Random |
| ENSG00000163382 | ENST00000368235 | NAXE    | Diff. RPE1 GFP-Centrin | Random |
| ENSG00000010292 | ENST00000315579 | NCAPD2  | Diff. RPE1 GFP-Centrin | Random |
| ENSG00000109805 | ENST00000251496 | NCAPG   | Diff. RPE1 GFP-Centrin | Random |
| ENSG00000167566 | ENST00000335999 | NCKAP5L | Diff. RPE1 GFP-Centrin | Random |
| ENSG00000166579 | ENST00000334527 | NDEL1   | Diff. RPE1 GFP-Centrin | Random |
| ENSG00000166579 | ENST00000402554 | NDEL1   | Diff. RPE1 GFP-Centrin | Random |
| ENSG00000104419 | ENST00000323851 | NDRG1   | Diff. RPE1 GFP-Centrin | Random |
| ENSG00000137601 | ENST00000507142 | NEK1    | Diff. RPE1 GFP-Centrin | Random |
| ENSG00000137601 | ENST00000511633 | NEK1    | Diff. RPE1 GFP-Centrin | Random |
| ENSG00000117650 | ENST00000366999 | NEK2    | Diff. RPE1 GFP-Centrin | Random |
| ENSG00000136098 | ENST00000610828 | NEK3    | Diff. RPE1 GFP-Centrin | Random |
| ENSG00000114904 | ENST00000233027 | NEK4    | Diff. RPE1 GFP-Centrin | Random |
| ENSG00000119408 | ENST00000320246 | NEK6    | Diff. RPE1 GFP-Centrin | Random |
| ENSG00000151414 | ENST00000367385 | NEK7    | Diff. RPE1 GFP-Centrin | Random |
| ENSG00000119638 | ENST00000238616 | NEK9    | Diff. RPE1 GFP-Centrin | Random |
| ENSG00000119638 | ENST00000238616 | NEK9    | Diff. RPE1 GFP-Centrin | Random |
| ENSG00000196712 | ENST00000358273 | NF1     | Diff. RPE1 GFP-Centrin | Random |
| ENSG00000116044 | ENST00000397063 | NFE2L2  | Diff. RPE1 GFP-Centrin | Random |
| ENSG00000100906 | ENST00000216797 | NFKBIA  | Diff. RPE1 GFP-Centrin | Random |
| ENSG00000145029 | ENST00000273598 | NICN1   | Diff. RPE1 GFP-Centrin | Random |
| ENSG00000239672 | ENST00000393196 | NME1    | Diff. RPE1 GFP-Centrin | Random |
| ENSG00000144061 | ENST00000445609 | NPHP1   | Diff. RPE1 GFP-Centrin | Random |
| ENSG00000113971 | ENST00000337331 | NPHP3   | Diff. RPE1 GFP-Centrin | Random |
| ENSG00000131697 | ENST00000378156 | NPHP4   | Diff. RPE1 GFP-Centrin | Random |
| ENSG00000181163 | ENST00000296930 | NPM1    | Diff. RPE1 GFP-Centrin | Random |
| ENSG00000181163 | ENST00000517671 | NPM1    | Diff. RPE1 GFP-Centrin | Random |
| ENSG00000117697 | ENST00000422588 | NSL1    | Diff. RPE1 GFP-Centrin | Random |
| ENSG00000103274 | ENST00000283027 | NUBP1   | Diff. RPE1 GFP-Centrin | Random |
| ENSG00000095906 | ENST00000262302 | NUBP2   | Diff. RPE1 GFP-Centrin | Random |
| ENSG00000090273 | ENST00000321265 | NUDC    | Diff. RPE1 GFP-Centrin | Random |
| ENSG00000167005 | ENST00000300291 | NUDT21  | Diff. RPE1 GFP-Centrin | Random |
| ENSG00000111581 | ENST00000229179 | NUP107  | Diff. RPE1 GFP-Centrin | Random |
| ENSG00000069248 | ENST00000261396 | NUP133  | Diff. RPE1 GFP-Centrin | Random |
| ENSG00000125450 | ENST00000245544 | NUP85   | Diff. RPE1 GFP-Centrin | Random |
| ENSG00000137804 | ENST00000414849 | NUSAP1  | Diff. RPE1 GFP-Centrin | Random |
| ENSG00000124006 | ENST00000404537 | OBSL1   | Diff. RPE1 GFP-Centrin | Random |
| ENSG00000122126 | ENST00000357121 | OCRL    | Diff. RPE1 GFP-Centrin | Random |
| ENSG00000138430 | ENST00000344357 | OLA1    | Diff. RPE1 GFP-Centrin | Random |
| ENSG00000115942 | ENST00000234296 | ORC2    | Diff. RPE1 GFP-Centrin | Random |
| ENSG00000102981 | ENST00000458121 | PARD6A  | Diff. RPE1 GFP-Centrin | Random |
| ENSG00000102981 | ENST00000458121 | PARD6A  | Diff. RPE1 GFP-Centrin | Random |
| ENSG00000041880 | ENST00000398755 | PARP3   | Diff. RPE1 GFP-Centrin | Random |
| ENSG00000132849 | ENST00000371158 | PATJ    | Diff. RPE1 GFP-Centrin | Random |
| ENSG00000166803 | ENST00000559519 | PCLAF   | Diff. RPE1 GFP-Centrin | Random |
| ENSG00000078674 | ENST00000325083 | PCM1    | Diff. RPE1 GFP-Centrin | Random |
| ENSG00000132646 | ENST00000379143 | PCNA    | Diff. RPE1 GFP-Centrin | Random |
| ENSG00000154678 | ENST00000396193 | PDE1C   | Diff. RPE1 GFP-Centrin | Random |
| ENSG00000113448 | ENST00000340635 | PDE4D   | Diff. RPE1 GFP-Centrin | Random |
| ENSG00000156973 | ENST00000287600 | PDE6D   | Diff. RPE1 GFP-Centrin | Random |

|                 |                 |          |                        |        |
|-----------------|-----------------|----------|------------------------|--------|
| ENSG00000241360 | ENST00000215904 | PDXP     | Diff. RPE1 GFP-Centrin | Random |
| ENSG00000100029 | ENST00000354694 | PES1     | Diff. RPE1 GFP-Centrin | Random |
| ENSG00000170950 | ENST00000304801 | PGK2     | Diff. RPE1 GFP-Centrin | Random |
| ENSG00000164902 | ENST00000297540 | PHAX     | Diff. RPE1 GFP-Centrin | Random |
| ENSG00000197724 | ENST00000359246 | PHF2     | Diff. RPE1 GFP-Centrin | Random |
| ENSG00000083535 | ENST00000326291 | PIBF1    | Diff. RPE1 GFP-Centrin | Random |
| ENSG00000051382 | ENST00000477593 | PIK3CB   | Diff. RPE1 GFP-Centrin | Random |
| ENSG00000127445 | ENST00000247970 | PIN1     | Diff. RPE1 GFP-Centrin | Random |
| ENSG00000254093 | ENST00000519088 | PINX1    | Diff. RPE1 GFP-Centrin | Random |
| ENSG00000110697 | ENST00000534749 | PITPNM1  | Diff. RPE1 GFP-Centrin | Random |
| ENSG00000118762 | ENST00000237596 | PKD2     | Diff. RPE1 GFP-Centrin | Random |
| ENSG00000067225 | ENST00000335181 | PKM      | Diff. RPE1 GFP-Centrin | Random |
| ENSG00000145632 | ENST00000274289 | PLK2     | Diff. RPE1 GFP-Centrin | Random |
| ENSG00000173846 | ENST00000372201 | PLK3     | Diff. RPE1 GFP-Centrin | Random |
| ENSG00000164087 | ENST00000296484 | POC1A    | Diff. RPE1 GFP-Centrin | Random |
| ENSG00000139323 | ENST00000313546 | POC1B    | Diff. RPE1 GFP-Centrin | Random |
| ENSG00000152359 | ENST00000428202 | POC5     | Diff. RPE1 GFP-Centrin | Random |
| ENSG00000070501 | ENST00000265421 | POLB     | Diff. RPE1 GFP-Centrin | Random |
| ENSG00000100413 | ENST00000355209 | POLR3H   | Diff. RPE1 GFP-Centrin | Random |
| ENSG00000066027 | ENST00000261461 | PPP2R5A  | Diff. RPE1 GFP-Centrin | Random |
| ENSG00000163605 | ENST00000356692 | PPP4R2   | Diff. RPE1 GFP-Centrin | Random |
| ENSG00000198901 | ENST00000556972 | PRC1     | Diff. RPE1 GFP-Centrin | Random |
| ENSG00000142875 | ENST00000370689 | PRKACB   | Diff. RPE1 GFP-Centrin | Random |
| ENSG00000114302 | ENST00000265563 | PRKAR2A  | Diff. RPE1 GFP-Centrin | Random |
| ENSG00000005249 | ENST00000265717 | PRKAR2B  | Diff. RPE1 GFP-Centrin | Random |
| ENSG00000101000 | ENST00000216968 | PROCR    | Diff. RPE1 GFP-Centrin | Random |
| ENSG00000080815 | ENST00000357710 | PSEN1    | Diff. RPE1 GFP-Centrin | Random |
| ENSG00000143801 | ENST00000366783 | PSEN2    | Diff. RPE1 GFP-Centrin | Random |
| ENSG00000129084 | ENST00000396393 | PSMA1    | Diff. RPE1 GFP-Centrin | Random |
| ENSG00000100804 | ENST00000361611 | PSMB5    | Diff. RPE1 GFP-Centrin | Random |
| ENSG00000134222 | ENST00000369909 | PSRC1    | Diff. RPE1 GFP-Centrin | Random |
| ENSG00000185920 | ENST00000546744 | PTCH1    | Diff. RPE1 GFP-Centrin | Random |
| ENSG00000076201 | ENST00000265562 | PTPN23   | Diff. RPE1 GFP-Centrin | Random |
| ENSG00000084733 | ENST00000264710 | RAB10    | Diff. RPE1 GFP-Centrin | Random |
| ENSG00000103769 | ENST00000564910 | RAB11A   | Diff. RPE1 GFP-Centrin | Random |
| ENSG00000112210 | ENST00000317483 | RAB23    | Diff. RPE1 GFP-Centrin | Random |
| ENSG00000222014 | ENST00000410061 | RAB6C    | Diff. RPE1 GFP-Centrin | Random |
| ENSG00000167461 | ENST00000300935 | RAB8A    | Diff. RPE1 GFP-Centrin | Random |
| ENSG00000011454 | ENST00000373647 | RABGAP1  | Diff. RPE1 GFP-Centrin | Random |
| ENSG00000011454 | ENST00000373647 | RABGAP1  | Diff. RPE1 GFP-Centrin | Random |
| ENSG00000152061 | ENST00000251507 | RABGAP1L | Diff. RPE1 GFP-Centrin | Random |
| ENSG00000161800 | ENST00000312377 | RACGAP1  | Diff. RPE1 GFP-Centrin | Random |
| ENSG00000204628 | ENST00000512805 | RACK1    | Diff. RPE1 GFP-Centrin | Random |
| ENSG00000051180 | ENST00000267868 | RAD51    | Diff. RPE1 GFP-Centrin | Random |
| ENSG00000185379 | ENST00000335858 | RAD51D   | Diff. RPE1 GFP-Centrin | Random |
| ENSG00000132341 | ENST00000254675 | RAN      | Diff. RPE1 GFP-Centrin | Random |
| ENSG00000099901 | ENST00000331821 | RANBP1   | Diff. RPE1 GFP-Centrin | Random |
| ENSG00000153201 | ENST00000283195 | RANBP2   | Diff. RPE1 GFP-Centrin | Random |
| ENSG00000031823 | ENST00000439268 | RANBP3   | Diff. RPE1 GFP-Centrin | Random |
| ENSG00000100401 | ENST00000356244 | RANGAP1  | Diff. RPE1 GFP-Centrin | Random |
| ENSG00000125249 | ENST00000245304 | RAP2A    | Diff. RPE1 GFP-Centrin | Random |
| ENSG00000158987 | ENST00000509018 | RAPGEF6  | Diff. RPE1 GFP-Centrin | Random |
| ENSG00000179051 | ENST00000375436 | RCC2     | Diff. RPE1 GFP-Centrin | Random |

|                 |                 |         |                        |        |
|-----------------|-----------------|---------|------------------------|--------|
| ENSG00000137710 | ENST00000343115 | RDX     | Diff. RPE1 GFP-Centrin | Random |
| ENSG00000165476 | ENST00000373758 | REEP3   | Diff. RPE1 GFP-Centrin | Random |
| ENSG00000168476 | ENST00000306306 | REEP4   | Diff. RPE1 GFP-Centrin | Random |
| ENSG00000104856 | ENST00000221452 | RELB    | Diff. RPE1 GFP-Centrin | Random |
| ENSG00000196862 | ENST00000408999 | RGPD4   | Diff. RPE1 GFP-Centrin | Random |
| ENSG00000111785 | ENST00000392837 | RIC8B   | Diff. RPE1 GFP-Centrin | Random |
| ENSG00000080345 | ENST00000243326 | RIF1    | Diff. RPE1 GFP-Centrin | Random |
| ENSG00000188026 | ENST00000376874 | RILPL1  | Diff. RPE1 GFP-Centrin | Random |
| ENSG00000139405 | ENST00000548278 | RITA1   | Diff. RPE1 GFP-Centrin | Random |
| ENSG00000176623 | ENST00000406452 | RMDN1   | Diff. RPE1 GFP-Centrin | Random |
| ENSG00000137824 | ENST00000338376 | RMDN3   | Diff. RPE1 GFP-Centrin | Random |
| ENSG00000112130 | ENST00000229866 | RNF8    | Diff. RPE1 GFP-Centrin | Random |
| ENSG00000134318 | ENST00000315872 | ROCK2   | Diff. RPE1 GFP-Centrin | Random |
| ENSG00000101413 | ENST00000373433 | RPRD1B  | Diff. RPE1 GFP-Centrin | Random |
| ENSG00000149273 | ENST00000524851 | RPS3    | Diff. RPE1 GFP-Centrin | Random |
| ENSG00000171863 | ENST00000304921 | RPS7    | Diff. RPE1 GFP-Centrin | Random |
| ENSG00000172426 | ENST00000372163 | RSPH9   | Diff. RPE1 GFP-Centrin | Random |
| ENSG00000087302 | ENST00000261700 | RTRAF   | Diff. RPE1 GFP-Centrin | Random |
| ENSG00000183207 | ENST00000596247 | RUVBL2  | Diff. RPE1 GFP-Centrin | Random |
| ENSG00000156876 | ENST00000287482 | SASS6   | Diff. RPE1 GFP-Centrin | Random |
| ENSG00000143653 | ENST00000366510 | SCCPDH  | Diff. RPE1 GFP-Centrin | Random |
| ENSG00000151466 | ENST00000281142 | SCLT1   | Diff. RPE1 GFP-Centrin | Random |
| ENSG00000111319 | ENST00000228916 | SCNN1A  | Diff. RPE1 GFP-Centrin | Random |
| ENSG00000157020 | ENST00000350697 | SEC13   | Diff. RPE1 GFP-Centrin | Random |
| ENSG00000085415 | ENST00000262124 | SEH1L   | Diff. RPE1 GFP-Centrin | Random |
| ENSG00000129810 | ENST00000442720 | SGO1    | Diff. RPE1 GFP-Centrin | Random |
| ENSG00000138771 | ENST00000296043 | SHROOM3 | Diff. RPE1 GFP-Centrin | Random |
| ENSG00000068903 | ENST00000249396 | SIRT2   | Diff. RPE1 GFP-Centrin | Random |
| ENSG00000182628 | ENST00000330137 | SKA2    | Diff. RPE1 GFP-Centrin | Random |
| ENSG00000157933 | ENST00000378536 | SKI     | Diff. RPE1 GFP-Centrin | Random |
| ENSG00000155380 | ENST00000369626 | SLC16A1 | Diff. RPE1 GFP-Centrin | Random |
| ENSG00000133302 | ENST00000265140 | SLF1    | Diff. RPE1 GFP-Centrin | Random |
| ENSG00000141646 | ENST00000342988 | SMAD4   | Diff. RPE1 GFP-Centrin | Random |
| ENSG00000101665 | ENST00000262158 | SMAD7   | Diff. RPE1 GFP-Centrin | Random |
| ENSG00000153147 | ENST00000283131 | SMARCA5 | Diff. RPE1 GFP-Centrin | Random |
| ENSG00000128602 | ENST00000249373 | SMO     | Diff. RPE1 GFP-Centrin | Random |
| ENSG00000099940 | ENST00000215730 | SNAP29  | Diff. RPE1 GFP-Centrin | Random |
| ENSG00000064199 | ENST00000227135 | SPA17   | Diff. RPE1 GFP-Centrin | Random |
| ENSG00000144451 | ENST00000432529 | SPAG16  | Diff. RPE1 GFP-Centrin | Random |
| ENSG00000061656 | ENST00000374273 | SPAG4   | Diff. RPE1 GFP-Centrin | Random |
| ENSG00000076382 | ENST00000321765 | SPAG5   | Diff. RPE1 GFP-Centrin | Random |
| ENSG00000133104 | ENST00000494062 | SPART   | Diff. RPE1 GFP-Centrin | Random |
| ENSG00000021574 | ENST00000615843 | SPAST   | Diff. RPE1 GFP-Centrin | Random |
| ENSG00000163611 | ENST00000295872 | SPICE1  | Diff. RPE1 GFP-Centrin | Random |
| ENSG00000198917 | ENST00000361256 | SPOUT1  | Diff. RPE1 GFP-Centrin | Random |
| ENSG00000084112 | ENST00000360239 | SSH1    | Diff. RPE1 GFP-Centrin | Random |
| ENSG00000176101 | ENST00000322310 | SSNA1   | Diff. RPE1 GFP-Centrin | Random |
| ENSG00000159433 | ENST00000290607 | STARD9  | Diff. RPE1 GFP-Centrin | Random |
| ENSG00000040341 | ENST00000355780 | STAU2   | Diff. RPE1 GFP-Centrin | Random |
| ENSG00000117632 | ENST00000374291 | STMN1   | Diff. RPE1 GFP-Centrin | Random |
| ENSG00000159082 | ENST00000438952 | SYNJ1   | Diff. RPE1 GFP-Centrin | Random |
| ENSG00000147526 | ENST00000348567 | TACC1   | Diff. RPE1 GFP-Centrin | Random |
| ENSG00000171148 | ENST00000301964 | TADA3   | Diff. RPE1 GFP-Centrin | Random |

|                 |                 |          |                        |        |
|-----------------|-----------------|----------|------------------------|--------|
| ENSG00000169762 | ENST00000405303 | TAPT1    | Diff. RPE1 GFP-Centrin | Random |
| ENSG00000127364 | ENST00000247881 | TAS2R4   | Diff. RPE1 GFP-Centrin | Random |
| ENSG00000156787 | ENST00000518805 | TBC1D31  | Diff. RPE1 GFP-Centrin | Random |
| ENSG00000146350 | ENST00000398197 | TBC1D32  | Diff. RPE1 GFP-Centrin | Random |
| ENSG00000141556 | ENST00000355528 | TBCD     | Diff. RPE1 GFP-Centrin | Random |
| ENSG00000284770 | ENST00000366601 | TBCE     | Diff. RPE1 GFP-Centrin | Random |
| ENSG00000139437 | ENST00000405876 | TCHP     | Diff. RPE1 GFP-Centrin | Random |
| ENSG00000120438 | ENST00000321394 | TCP1     | Diff. RPE1 GFP-Centrin | Random |
| ENSG00000179029 | ENST00000437139 | TMEM107  | Diff. RPE1 GFP-Centrin | Random |
| ENSG00000186889 | ENST00000335390 | TMEM17   | Diff. RPE1 GFP-Centrin | Random |
| ENSG00000150433 | ENST00000531262 | TMEM218  | Diff. RPE1 GFP-Centrin | Random |
| ENSG00000155755 | ENST00000286196 | TMEM237  | Diff. RPE1 GFP-Centrin | Random |
| ENSG00000164953 | ENST00000453321 | TMEM67   | Diff. RPE1 GFP-Centrin | Random |
| ENSG00000173273 | ENST00000310430 | TNKS     | Diff. RPE1 GFP-Centrin | Random |
| ENSG00000107854 | ENST00000371627 | TNKS2    | Diff. RPE1 GFP-Centrin | Random |
| ENSG00000083312 | ENST00000454282 | TNPO1    | Diff. RPE1 GFP-Centrin | Random |
| ENSG00000198718 | ENST00000361462 | TOGARAM1 | Diff. RPE1 GFP-Centrin | Random |
| ENSG00000197579 | ENST00000360538 | TOPORS   | Diff. RPE1 GFP-Centrin | Random |
| ENSG00000134779 | ENST00000383056 | TPGS2    | Diff. RPE1 GFP-Centrin | Random |
| ENSG00000204104 | ENST00000391993 | TRAF3IP1 | Diff. RPE1 GFP-Centrin | Random |
| ENSG00000213186 | ENST00000309784 | TRIM59   | Diff. RPE1 GFP-Centrin | Random |
| ENSG00000100106 | ENST00000403663 | TRIOBP   | Diff. RPE1 GFP-Centrin | Random |
| ENSG00000100815 | ENST00000267622 | TRIP11   | Diff. RPE1 GFP-Centrin | Random |
| ENSG00000103671 | ENST00000261884 | TRIP4    | Diff. RPE1 GFP-Centrin | Random |
| ENSG00000128881 | ENST00000267890 | TTBK2    | Diff. RPE1 GFP-Centrin | Random |
| ENSG00000149292 | ENST00000529221 | TTC12    | Diff. RPE1 GFP-Centrin | Random |
| ENSG00000011295 | ENST00000475723 | TTC19    | Diff. RPE1 GFP-Centrin | Random |
| ENSG00000123607 | ENST00000243344 | TTC21B   | Diff. RPE1 GFP-Centrin | Random |
| ENSG00000105948 | ENST00000464848 | TTC26    | Diff. RPE1 GFP-Centrin | Random |
| ENSG00000100154 | ENST00000397906 | TTC28    | Diff. RPE1 GFP-Centrin | Random |
| ENSG00000197557 | ENST00000355689 | TTC30A   | Diff. RPE1 GFP-Centrin | Random |
| ENSG00000165533 | ENST00000345383 | TTC8     | Diff. RPE1 GFP-Centrin | Random |
| ENSG00000135912 | ENST00000392102 | TTLL4    | Diff. RPE1 GFP-Centrin | Random |
| ENSG00000119685 | ENST00000298832 | TTLL5    | Diff. RPE1 GFP-Centrin | Random |
| ENSG00000123416 | ENST00000336023 | TUBA1B   | Diff. RPE1 GFP-Centrin | Random |
| ENSG00000127824 | ENST00000248437 | TUBA4A   | Diff. RPE1 GFP-Centrin | Random |
| ENSG00000137267 | ENST00000333628 | TUBB2A   | Diff. RPE1 GFP-Centrin | Random |
| ENSG00000258947 | ENST00000315491 | TUBB3    | Diff. RPE1 GFP-Centrin | Random |
| ENSG00000188229 | ENST00000340384 | TUBB4B   | Diff. RPE1 GFP-Centrin | Random |
| ENSG00000176014 | ENST00000317702 | TUBB6    | Diff. RPE1 GFP-Centrin | Random |
| ENSG00000074935 | ENST00000368662 | TUBE1    | Diff. RPE1 GFP-Centrin | Random |
| ENSG00000137822 | ENST00000564079 | TUBGCP4  | Diff. RPE1 GFP-Centrin | Random |
| ENSG00000112041 | ENST00000322263 | TULP1    | Diff. RPE1 GFP-Centrin | Random |
| ENSG00000078246 | ENST00000448120 | TULP3    | Diff. RPE1 GFP-Centrin | Random |
| ENSG00000130338 | ENST00000367097 | TULP4    | Diff. RPE1 GFP-Centrin | Random |
| ENSG00000115514 | ENST00000264255 | TXNDC9   | Diff. RPE1 GFP-Centrin | Random |
| ENSG00000127481 | ENST00000375254 | UBR4     | Diff. RPE1 GFP-Centrin | Random |
| ENSG00000109103 | ENST00000335765 | UNC119   | Diff. RPE1 GFP-Centrin | Random |
| ENSG00000175970 | ENST00000344651 | UNC119B  | Diff. RPE1 GFP-Centrin | Random |
| ENSG00000135763 | ENST00000258243 | URB2     | Diff. RPE1 GFP-Centrin | Random |
| ENSG00000124486 | ENST00000324545 | USP9X    | Diff. RPE1 GFP-Centrin | Random |
| ENSG00000198382 | ENST00000356136 | UVRAG    | Diff. RPE1 GFP-Centrin | Random |
| ENSG00000126756 | ENST00000333119 | UXT      | Diff. RPE1 GFP-Centrin | Random |

|                 |                 |         |                        |        |
|-----------------|-----------------|---------|------------------------|--------|
| ENSG00000139722 | ENST00000267202 | VPS37B  | Diff. RPE1 GFP-Centrin | Random |
| ENSG00000132612 | ENST00000254950 | VPS4A   | Diff. RPE1 GFP-Centrin | Random |
| ENSG00000119541 | ENST00000238497 | VPS4B   | Diff. RPE1 GFP-Centrin | Random |
| ENSG00000143951 | ENST00000409354 | WDPCP   | Diff. RPE1 GFP-Centrin | Random |
| ENSG00000119333 | ENST00000372715 | WDR34   | Diff. RPE1 GFP-Centrin | Random |
| ENSG00000118965 | ENST00000281405 | WDR35   | Diff. RPE1 GFP-Centrin | Random |
| ENSG00000085433 | ENST00000369962 | WDR47   | Diff. RPE1 GFP-Centrin | Random |
| ENSG00000126870 | ENST00000407559 | WDR60   | Diff. RPE1 GFP-Centrin | Random |
| ENSG00000075702 | ENST00000401500 | WDR62   | Diff. RPE1 GFP-Centrin | Random |
| ENSG00000095397 | ENST00000265134 | WHRN    | Diff. RPE1 GFP-Centrin | Random |
| ENSG00000011451 | ENST00000599686 | WIZ     | Diff. RPE1 GFP-Centrin | Random |
| ENSG00000116213 | ENST00000270708 | WRAP73  | Diff. RPE1 GFP-Centrin | Random |
| ENSG00000165392 | ENST00000298139 | WRN     | Diff. RPE1 GFP-Centrin | Random |
| ENSG00000196584 | ENST00000359321 | XRCC2   | Diff. RPE1 GFP-Centrin | Random |
| ENSG00000164924 | ENST00000395958 | YWHAZ   | Diff. RPE1 GFP-Centrin | Random |
| ENSG00000214717 | ENST00000381223 | ZBED1   | Diff. RPE1 GFP-Centrin | Random |
| ENSG00000166140 | ENST00000561768 | ZFYVE19 | Diff. RPE1 GFP-Centrin | Random |
| ENSG00000072121 | ENST00000347230 | ZFYVE26 | Diff. RPE1 GFP-Centrin | Random |
| ENSG00000164631 | ENST00000405858 | ZNF12   | Diff. RPE1 GFP-Centrin | Random |
| ENSG00000010244 | ENST00000394673 | ZNF207  | Diff. RPE1 GFP-Centrin | Random |
| ENSG00000181315 | ENST00000415922 | ZNF322  | Diff. RPE1 GFP-Centrin | Random |
| ENSG00000109445 | ENST00000262990 | ZNF330  | Diff. RPE1 GFP-Centrin | Random |
| ENSG00000138311 | ENST00000395254 | ZNF365  | Diff. RPE1 GFP-Centrin | Random |
